# Supplementary material for: Synthetic application of gold nanoparticles and auric chloride for the synthesis of 5-substituted 1H-tetrazoles
Source: Royal Society of Chemistry journal article supplement (doi:10.1039/c4ra13461c), 2015-01-01
Supplement: c4ra13461c1.pdf [file c4ra13461c1.pdf]

## Synthetic application of gold nano particles and auric chloride for the synthesis of 5-substituted 1-*H* tetrazoles.

Satyanand Kumar<sup>a</sup>, Arvind Kumar<sup>a</sup>, Alka Agarwal<sup>\*b</sup> and Satish Kumar Awasthi<sup>\*a</sup>

<sup>a</sup>Chemical Biology Laboratory, Department of Chemistry, University of Delhi, Delhi-110007 India. Tel: +911127666646, ext. 121, 134. E- mail: satishpna@hmail.com,

<sup>b</sup>Department of Medicinal Chemistry, IMS, BHU, Varanasi-221005, India. Tel: +919453048577, E-mail: alka\_ag\_2000@yahoo.com, dralka@bhu.ac.in

### Table of contents

|                                                                                                                                  |    |
|----------------------------------------------------------------------------------------------------------------------------------|----|
| Characterization by using single crystal XRD .....                                                                               | 1  |
| Crystal Structure of Compound 2b                                                                                                 |    |
| <sup>1</sup> H NMR, <sup>13</sup> C NMR and IR Spectroscopic data (all compounds are previously reported in the literature)..... | 2  |
| ICP analysis data .....                                                                                                          | 50 |

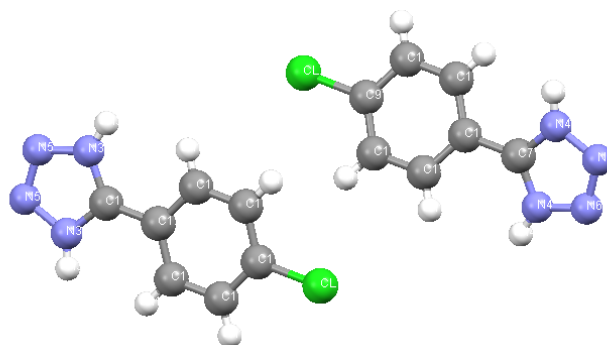

ORTEP diagram for compound 2b

<sup>1</sup>H NMR of 1b

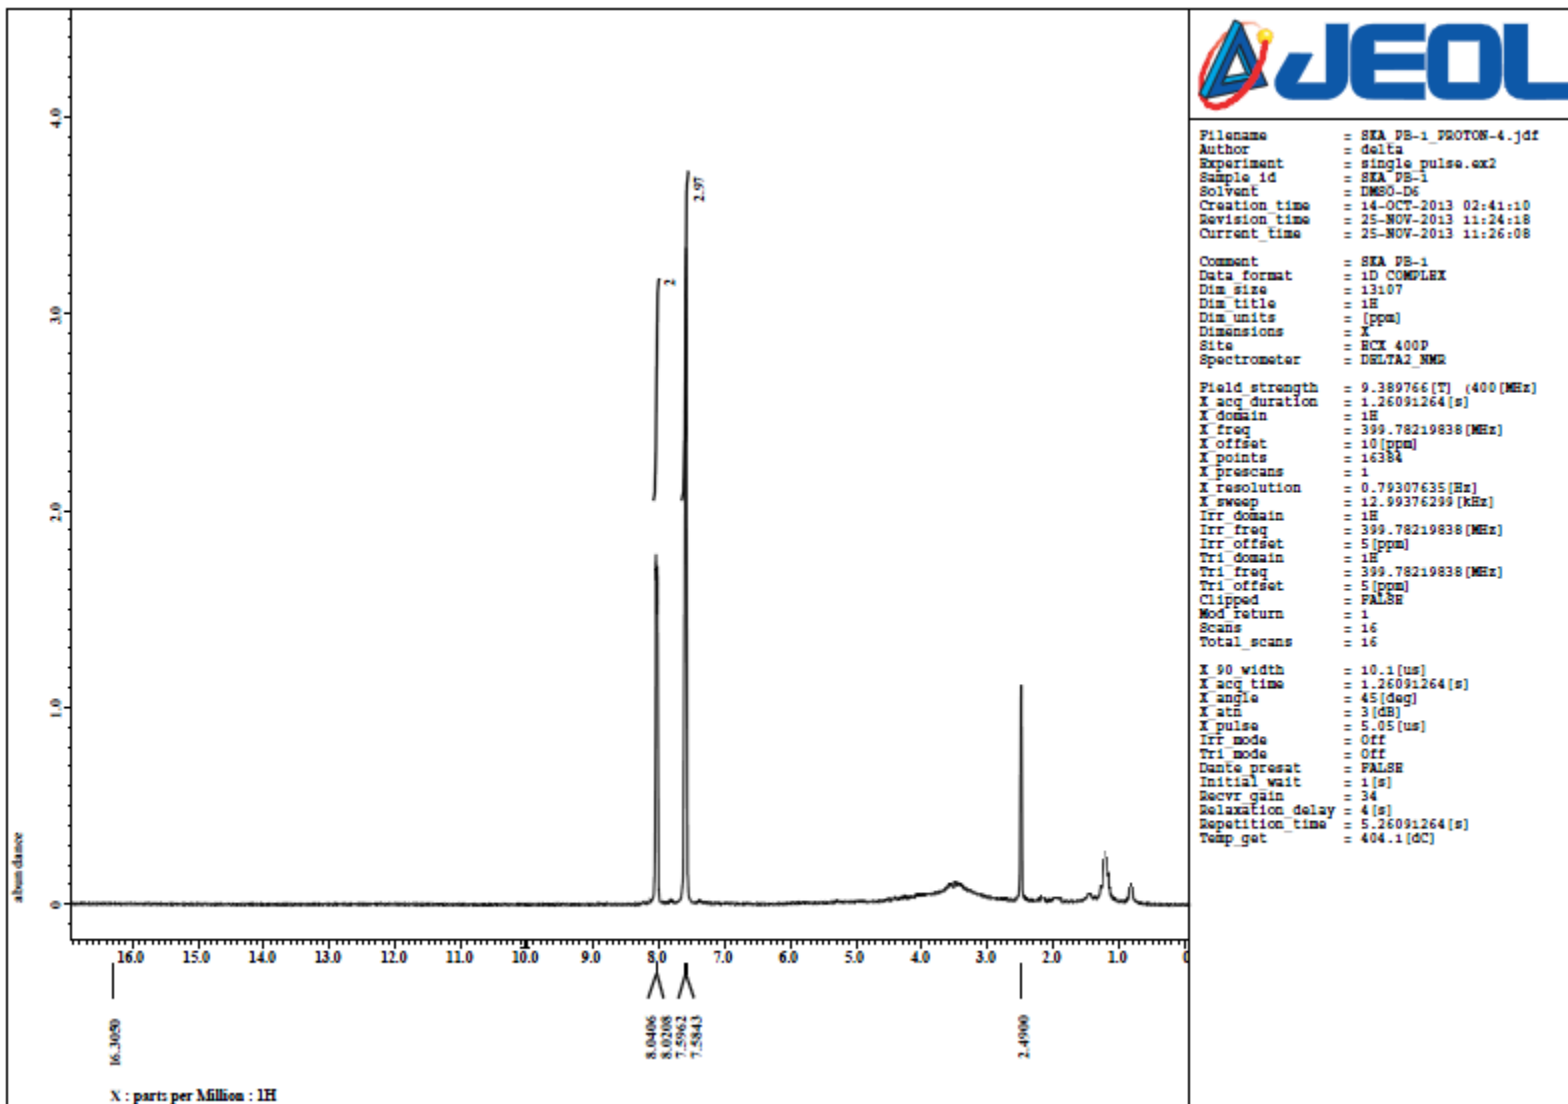

<sup>13</sup>C NMR of 1b

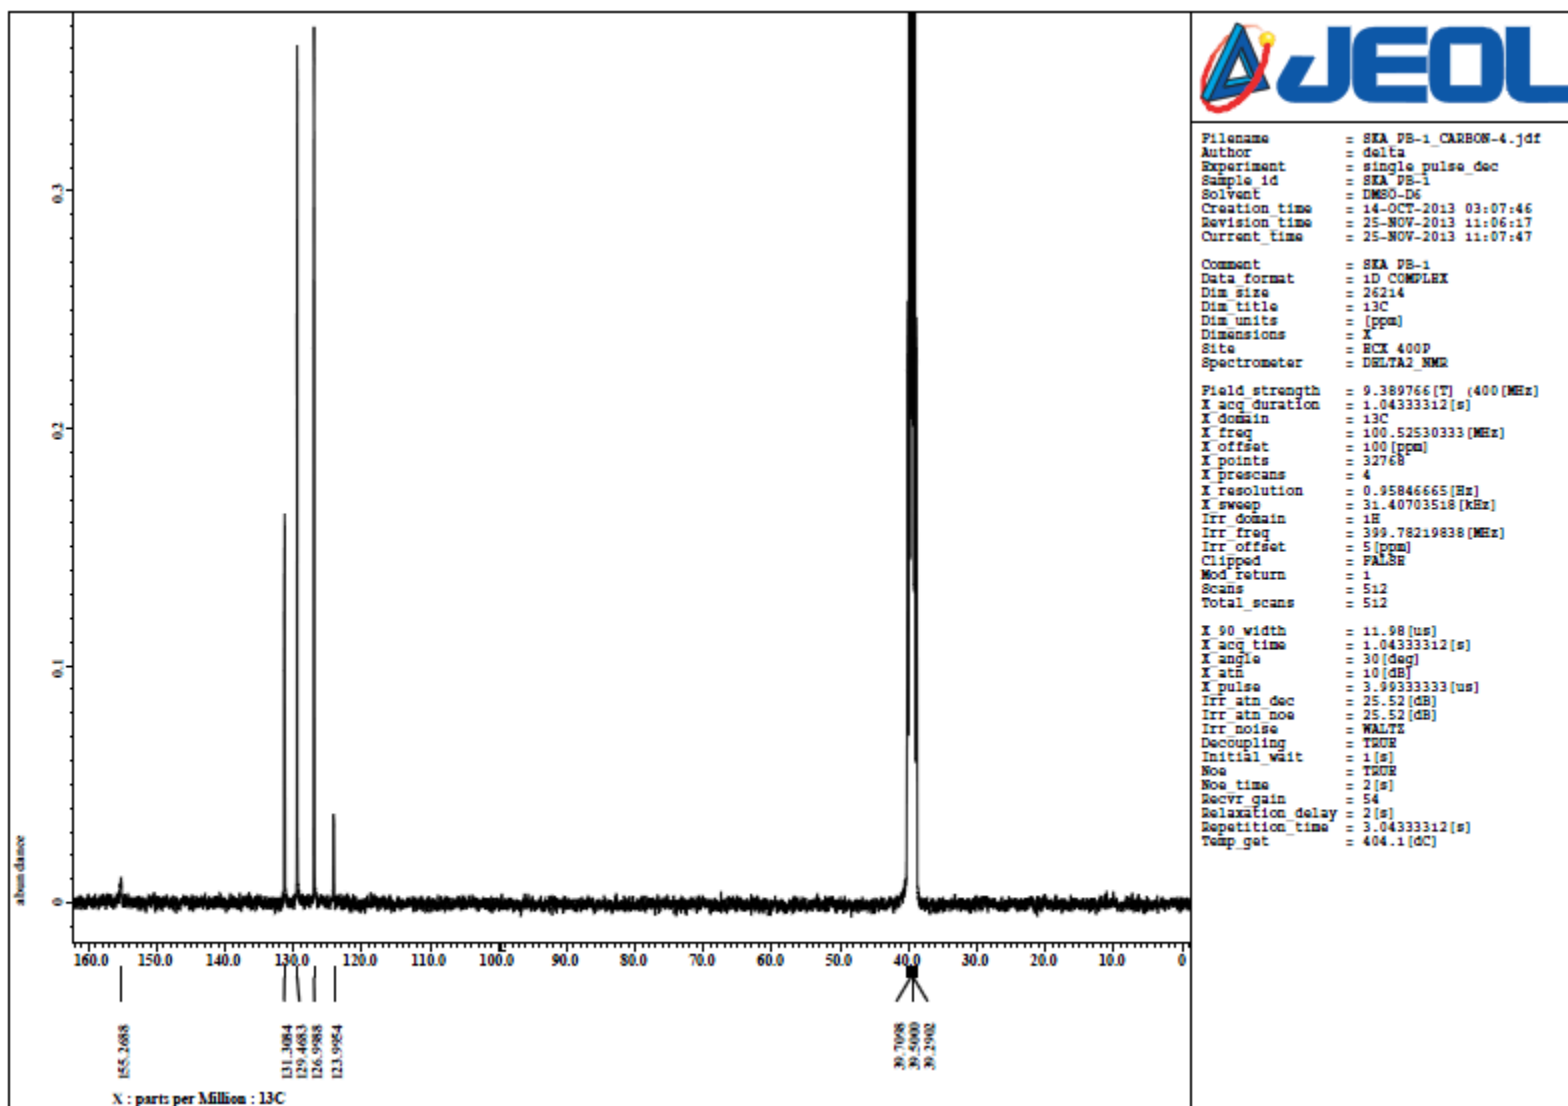

IR Spectra of 1b

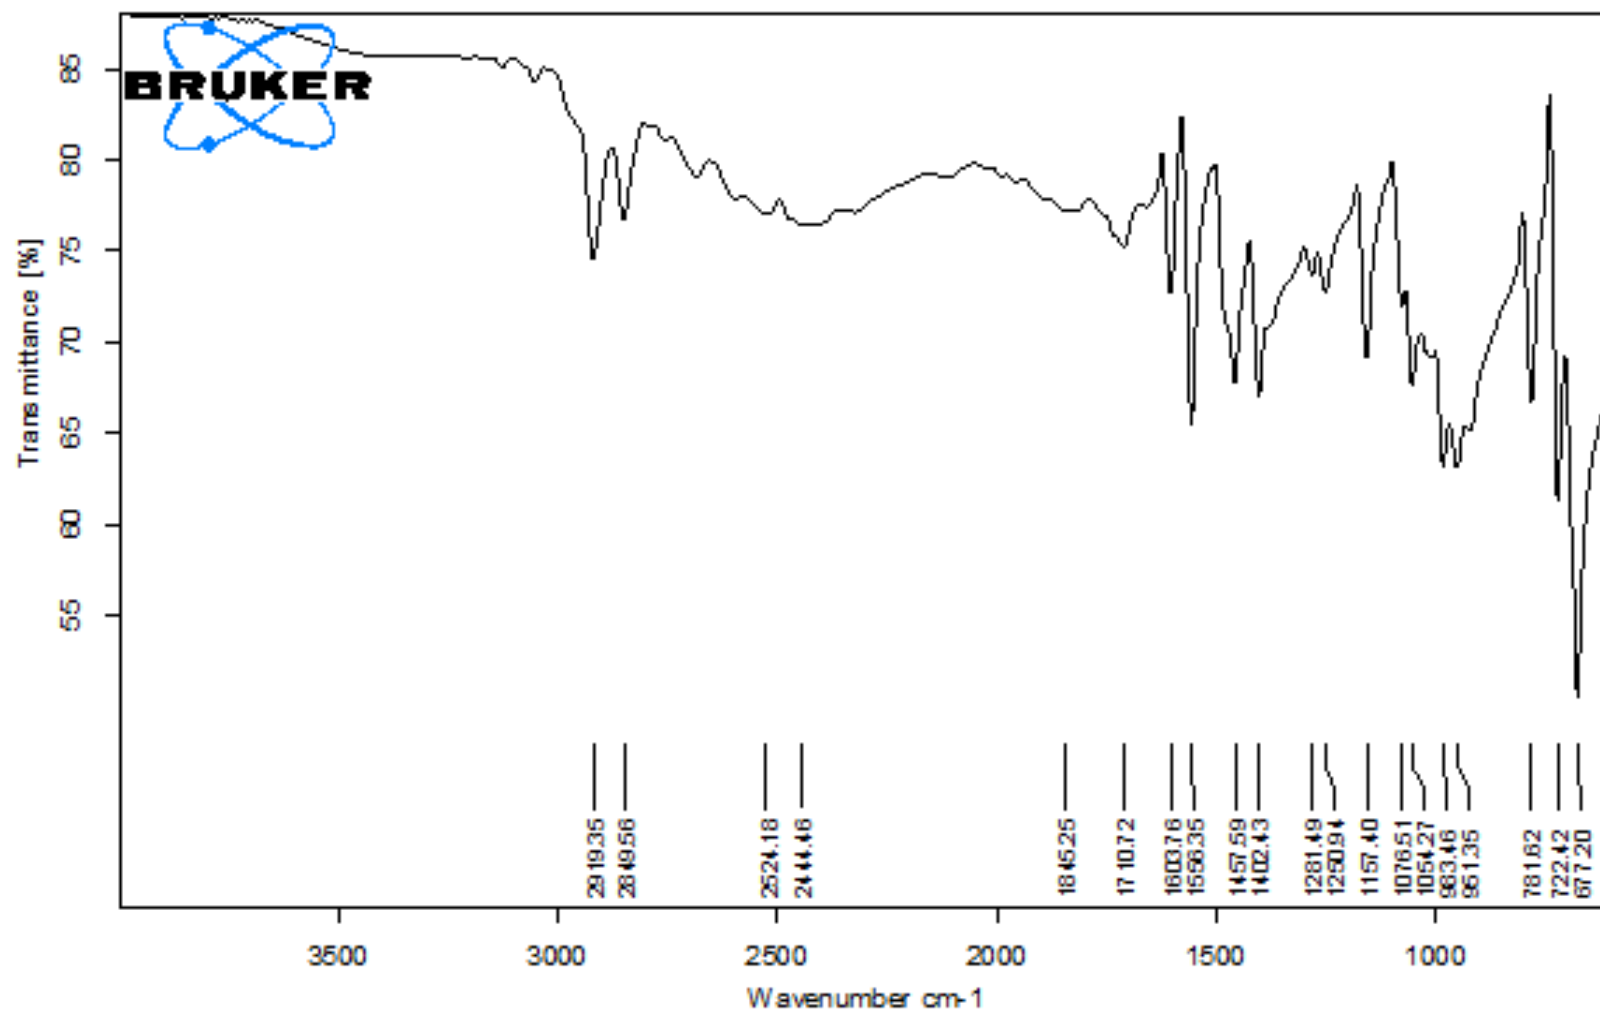

<sup>1</sup>H NMR of 2b

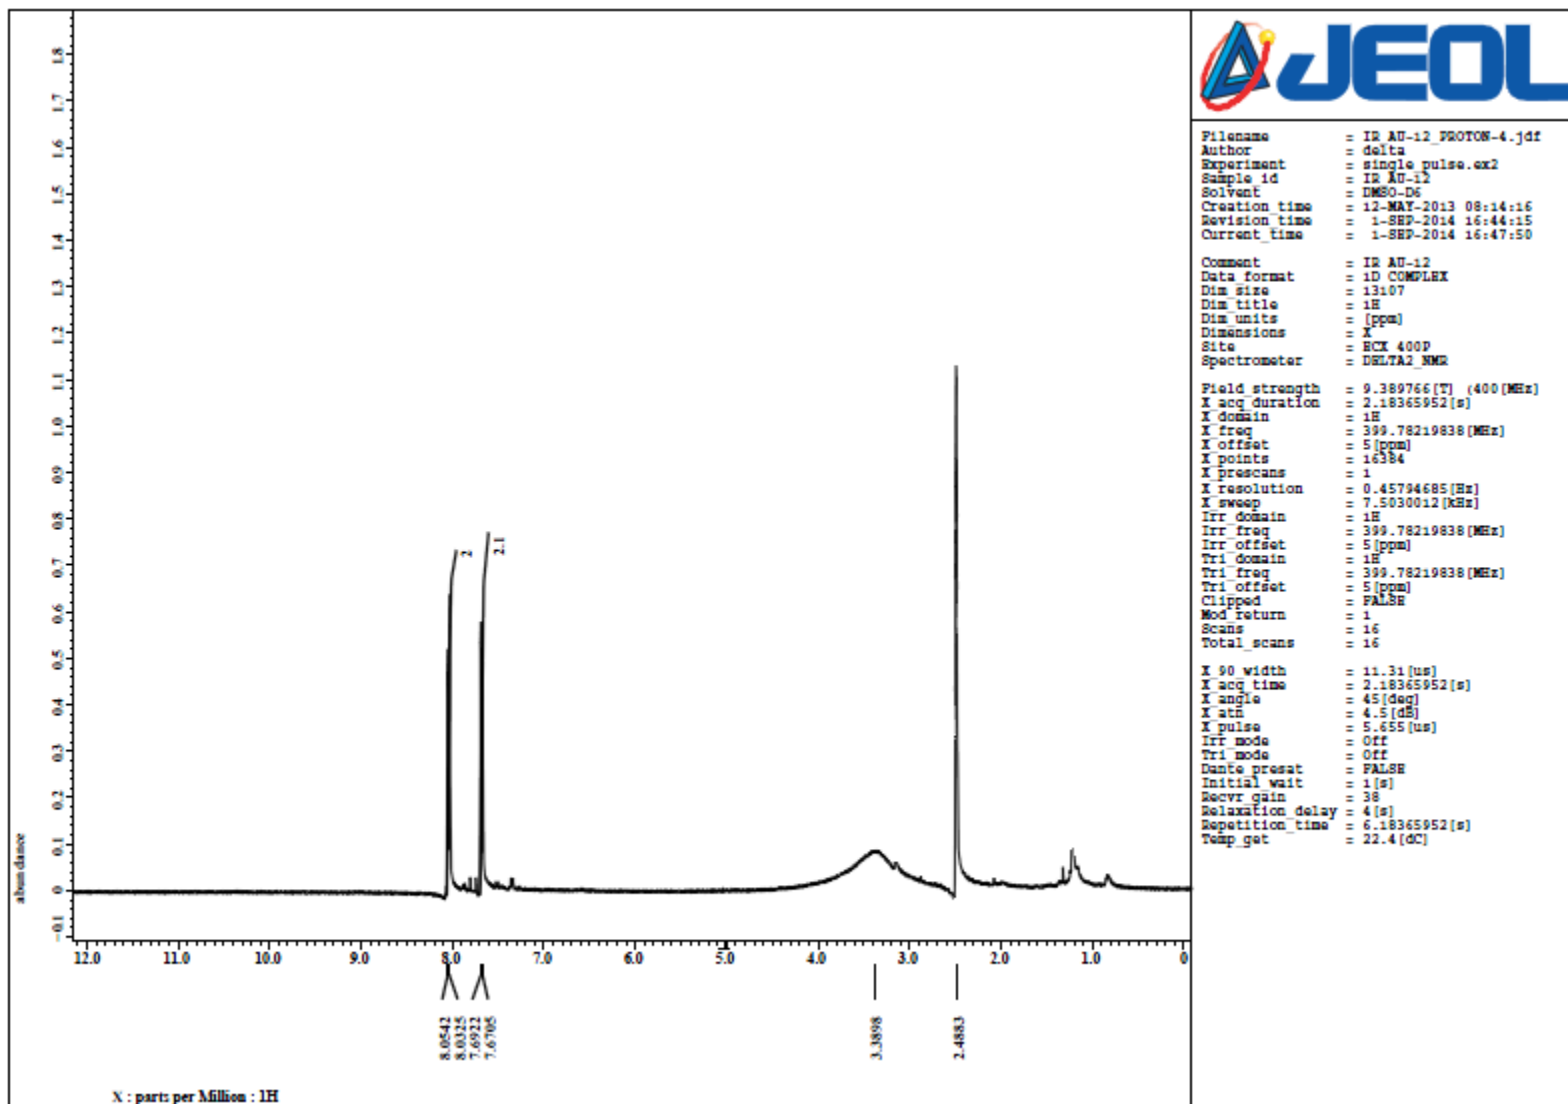

<sup>13</sup>C NMR of 2b

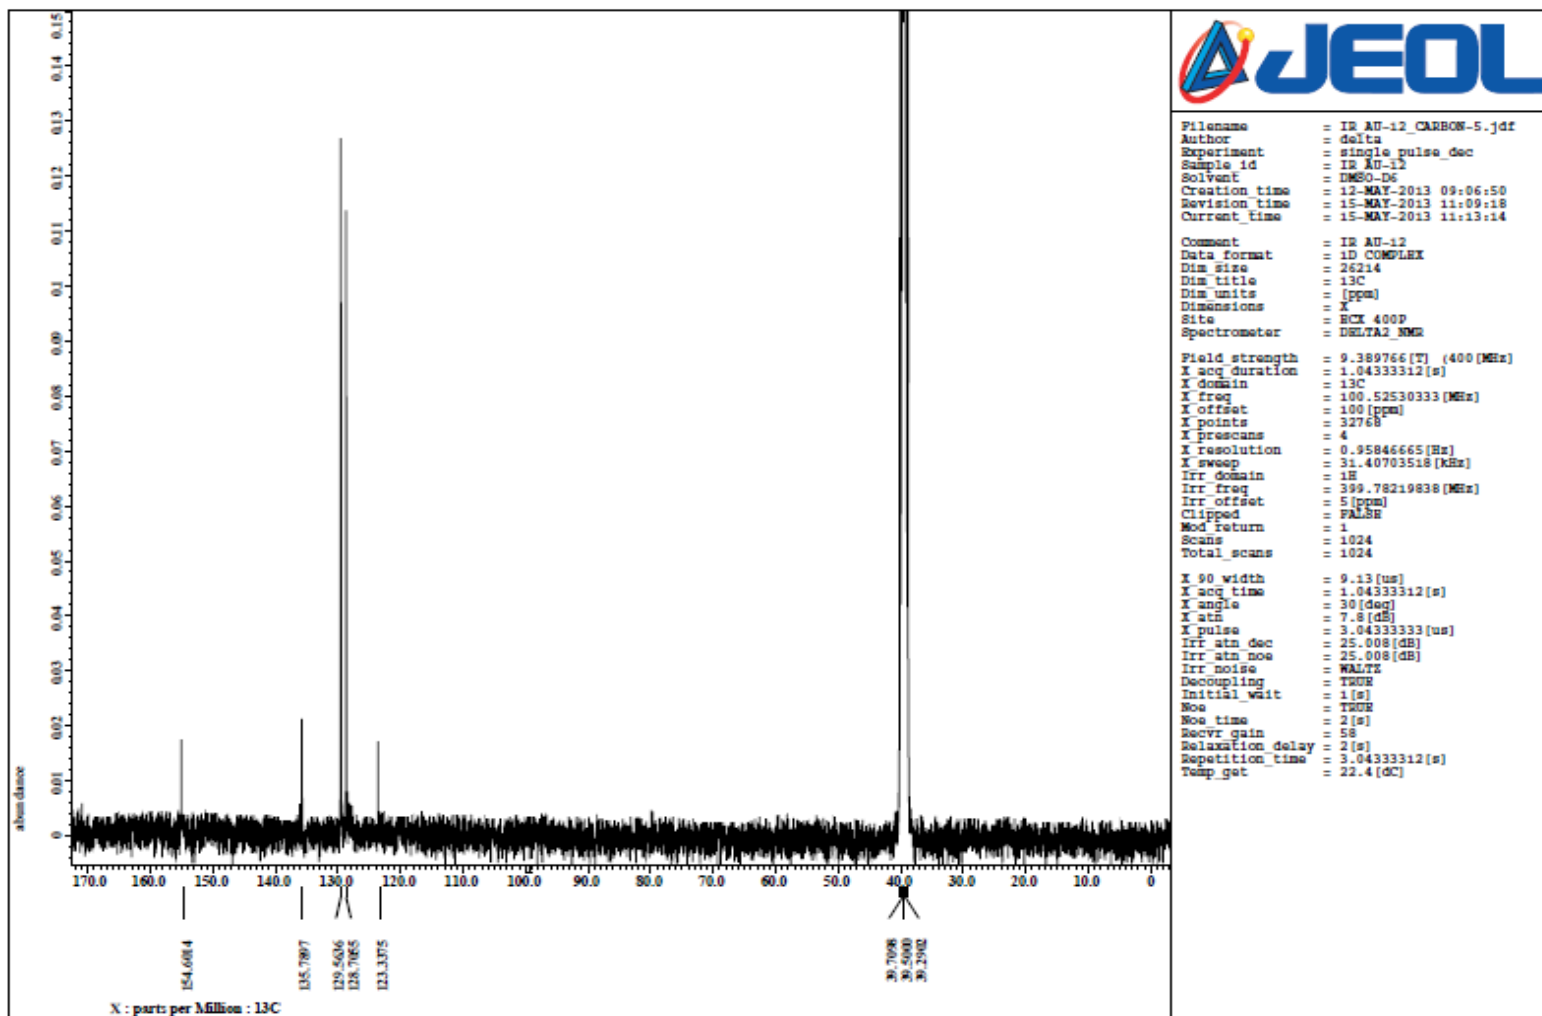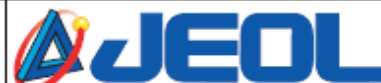

```
Filename      = IR AU-12 CARBON-5.jdr
Author       = delta
Experiment    = single pulse_dec
Sample id    = IR AU-12
Solvent      = DMSO-D6
Creation time = 12-MAY-2013 09:06:50
Revision time = 15-MAY-2013 11:09:18
Current time  = 15-MAY-2013 11:13:14

Comment      = IR AU-12
Data format  = 1D COMPLEX
Dim size     = 26214
Dim title    = 13C
Dim units    = [ppm]
Dimensions   = X
Site         = ECK 400P
Spectrometer = DELTA2 NMR

Field strength = 9.389766 [T] (400 [MHz])
X acq duration = 1.04333312 [s]
X domain      = 13C
X freq        = 100.52530333 [MHz]
X offset      = 100 [ppm]
X points      = 32768
X prescans    = 4
X resolution  = 0.95846665 [Hz]
X sweep       = 31.40703518 [kHz]
Irr domain    = 1H
Irr freq      = 399.78219838 [MHz]
Irr offset    = 5 [ppm]
Clipped      = FALSE
Mod return    = 1
Scans         = 1024
Total scans   = 1024

X 90 width    = 9.13 [us]
X acq time    = 1.04333312 [s]
X angle       = 30 [deg]
X atm        = 7.8 [dB]
X pulse       = 3.04333333 [us]
Irr atm dec  = 25.008 [dB]
Irr atm noe  = 25.008 [dB]
Irr noise    = WALTE
Decoupling    = TWDR
Initial wait  = 1 [s]
Noe           = TWDR
Noe time     = 2 [s]
Recvr gain    = 58
Relaxation delay = 2 [s]
Repetition time = 3.04333312 [s]
Temp_get     = 22.4 [dC]
```

IR spectra of 2b

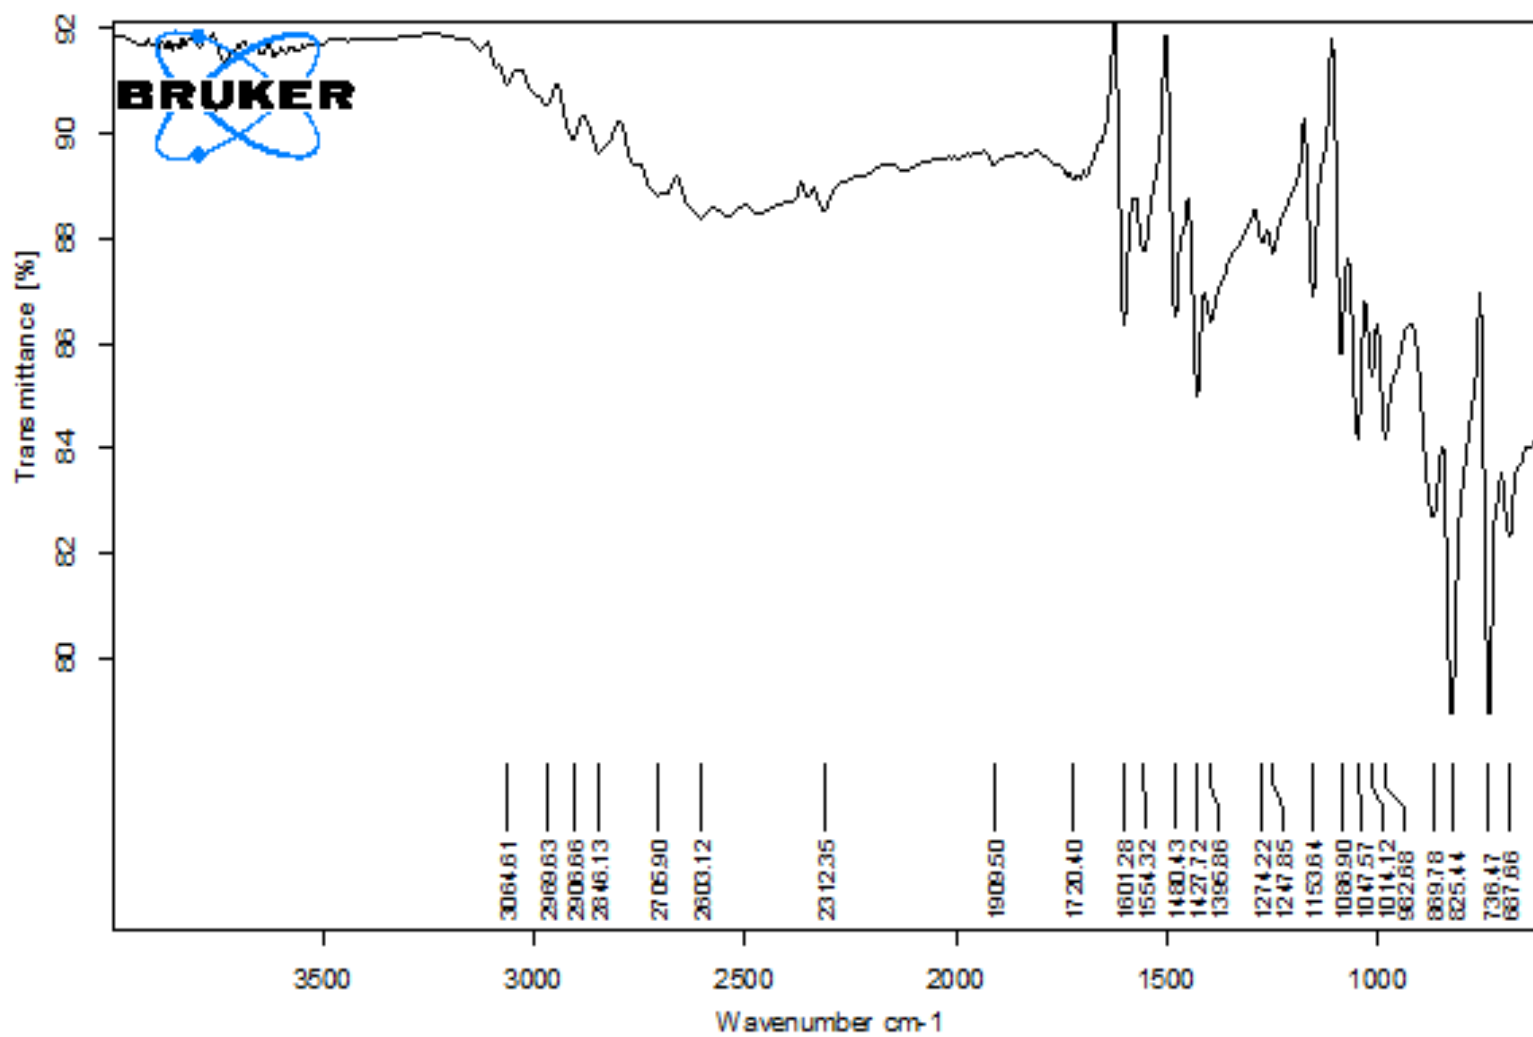

<sup>1</sup>H NMR of 3b

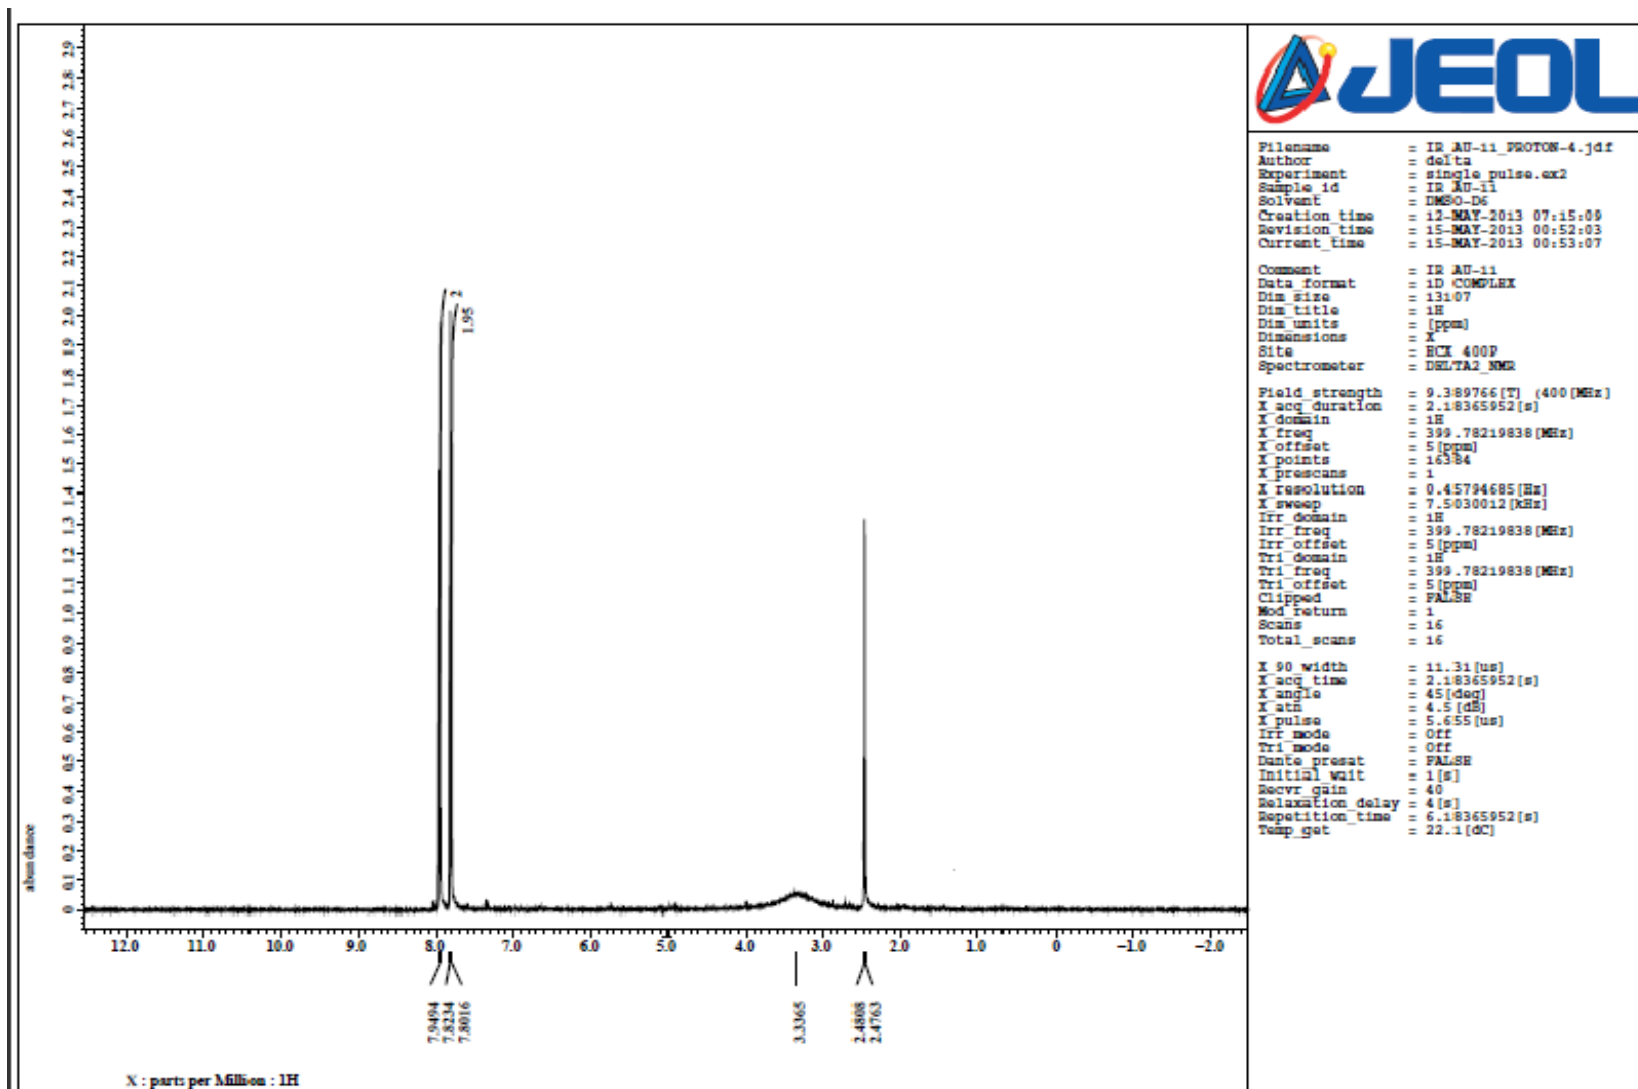



<sup>13</sup>C NMR of 3b

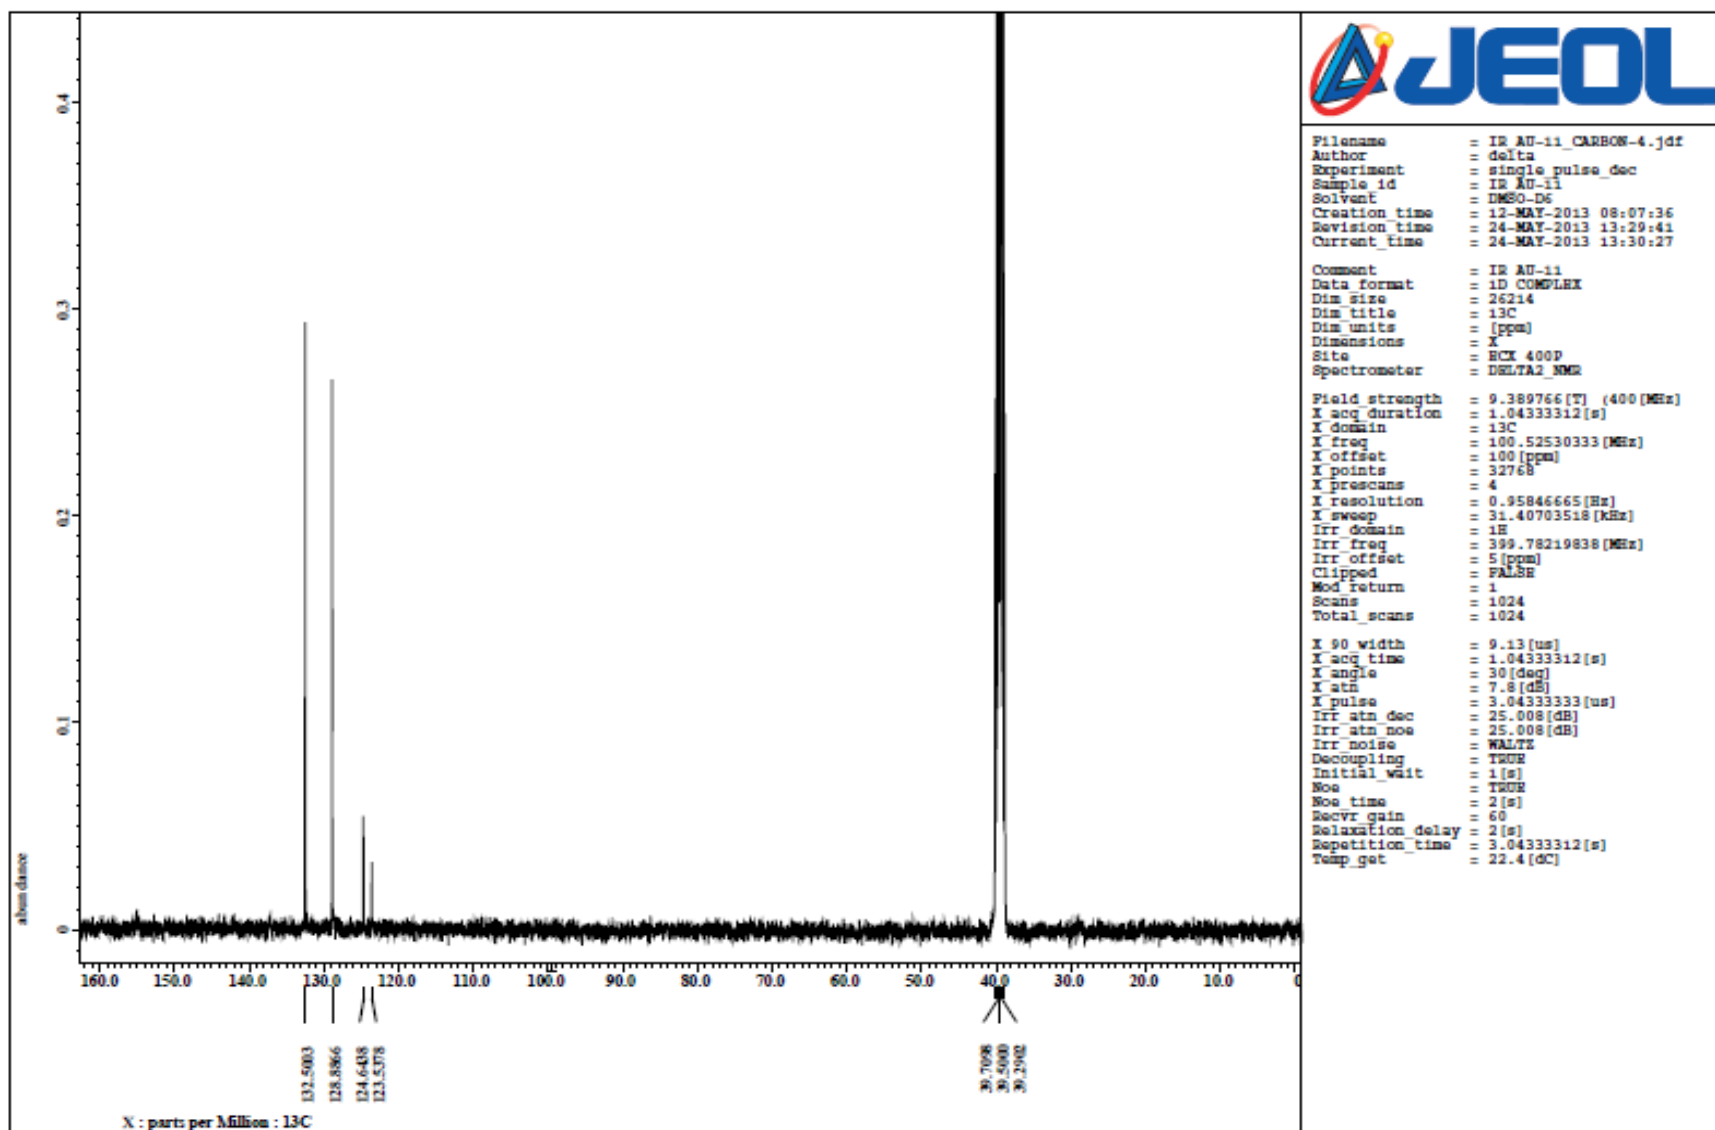

IR spectra of 3b

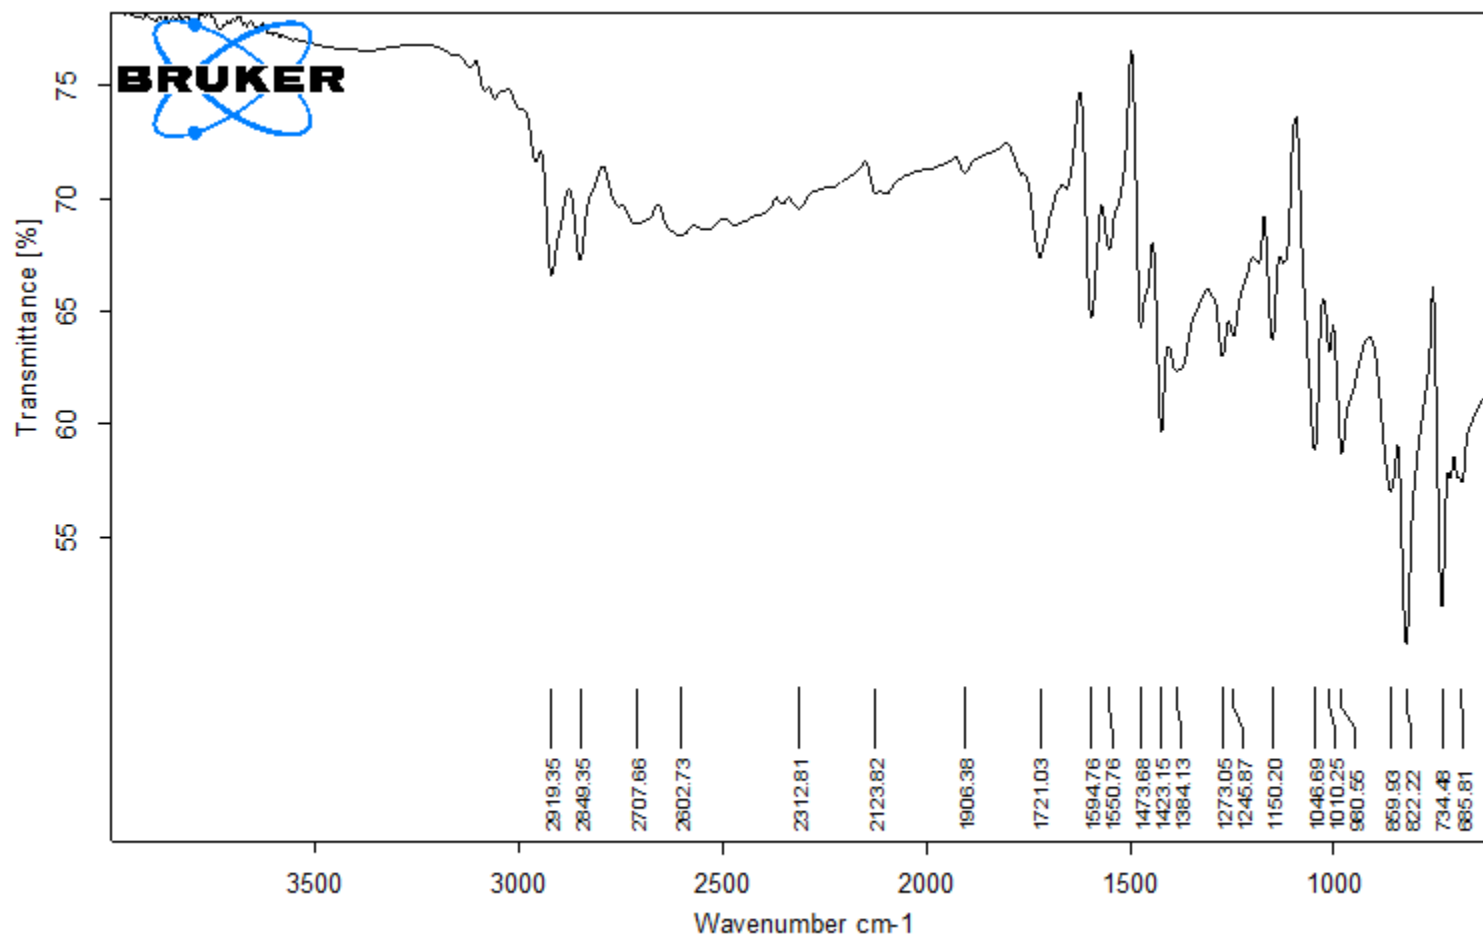

<sup>1</sup>H NMR of 4b

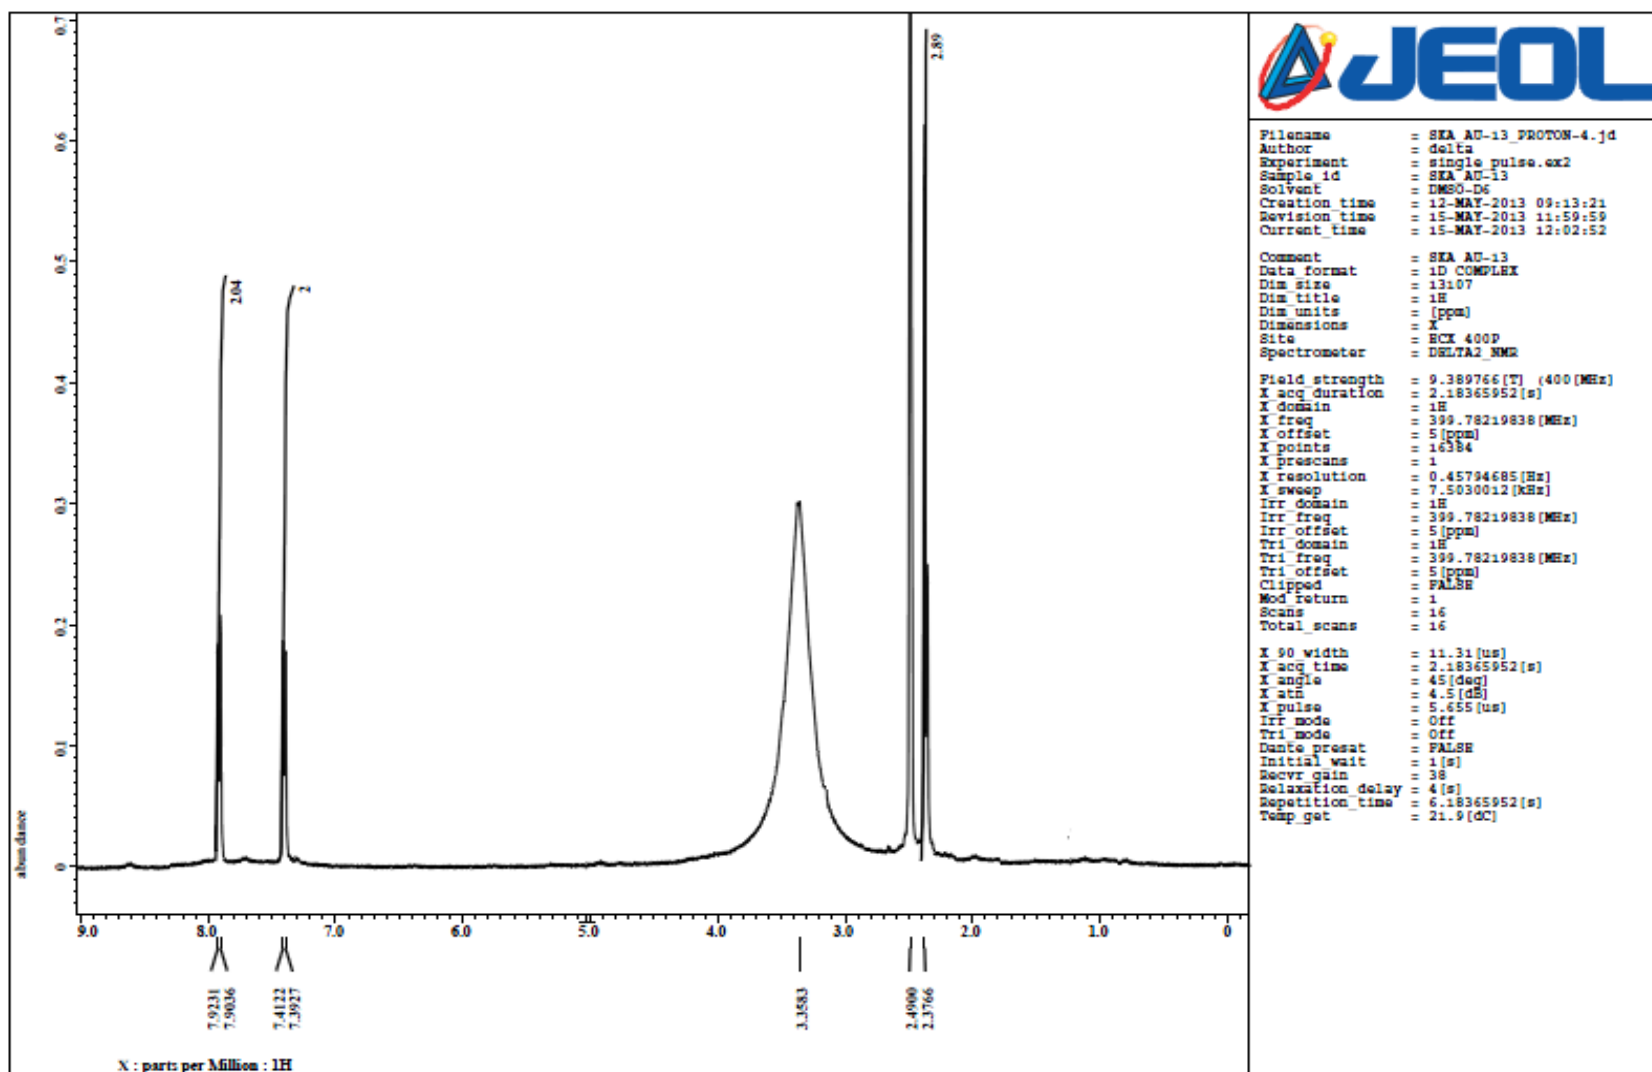

<sup>13</sup>C NMR of 4B

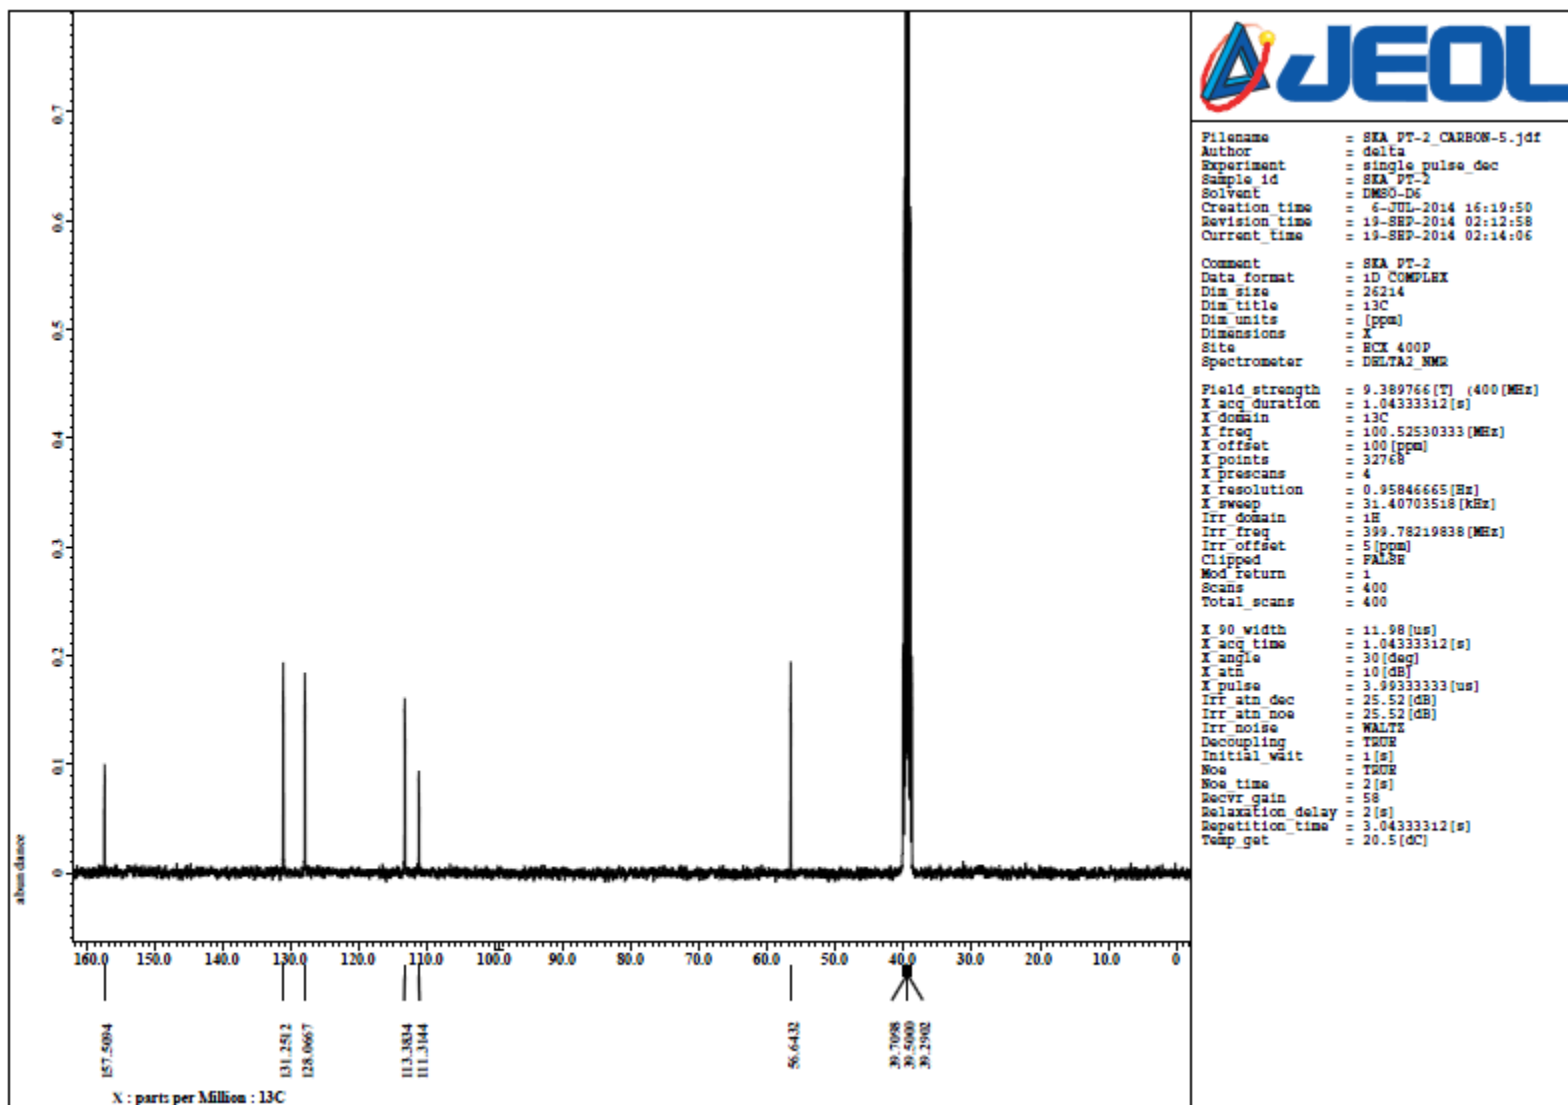

IR spectra of 4b

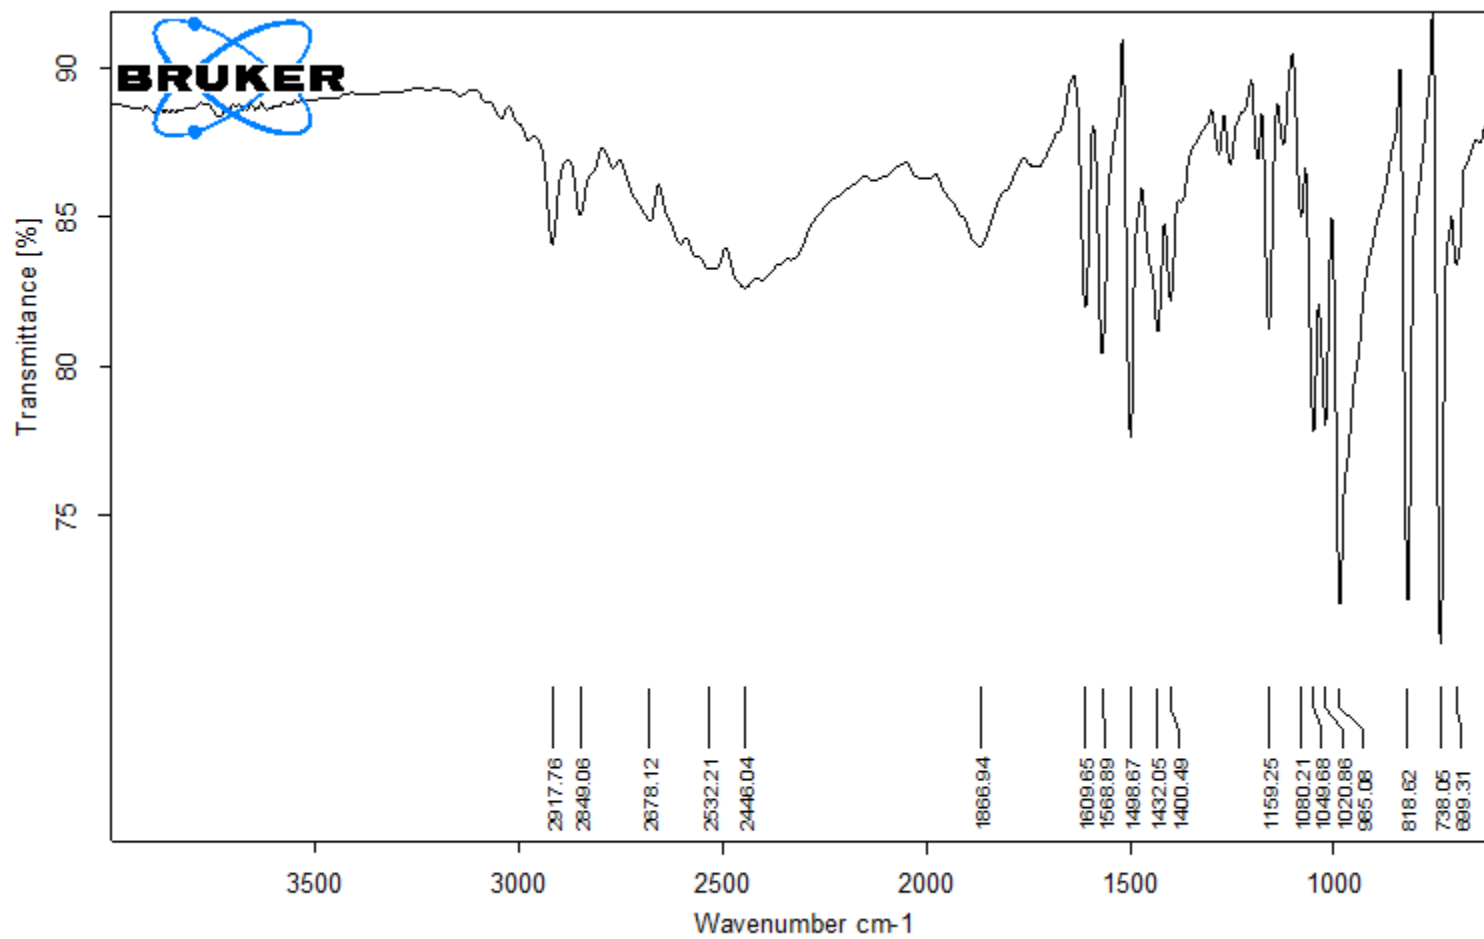

<sup>1</sup>H NMR of 5b

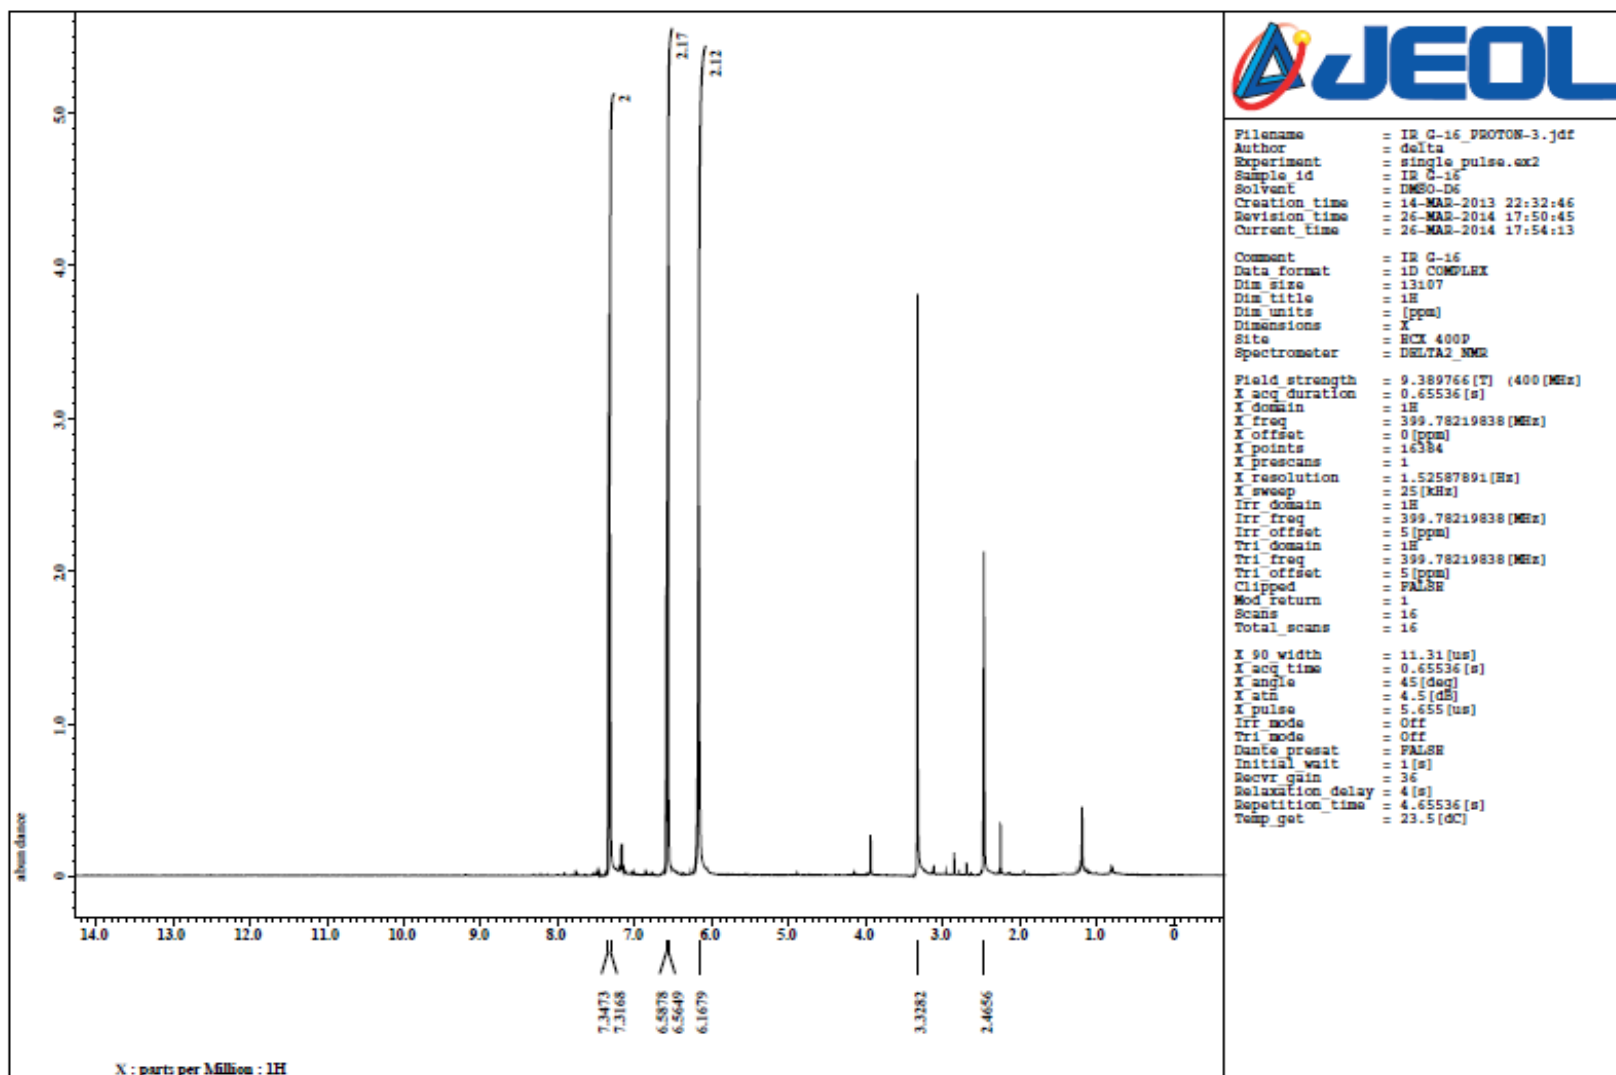

<sup>13</sup>C NMR of 5b

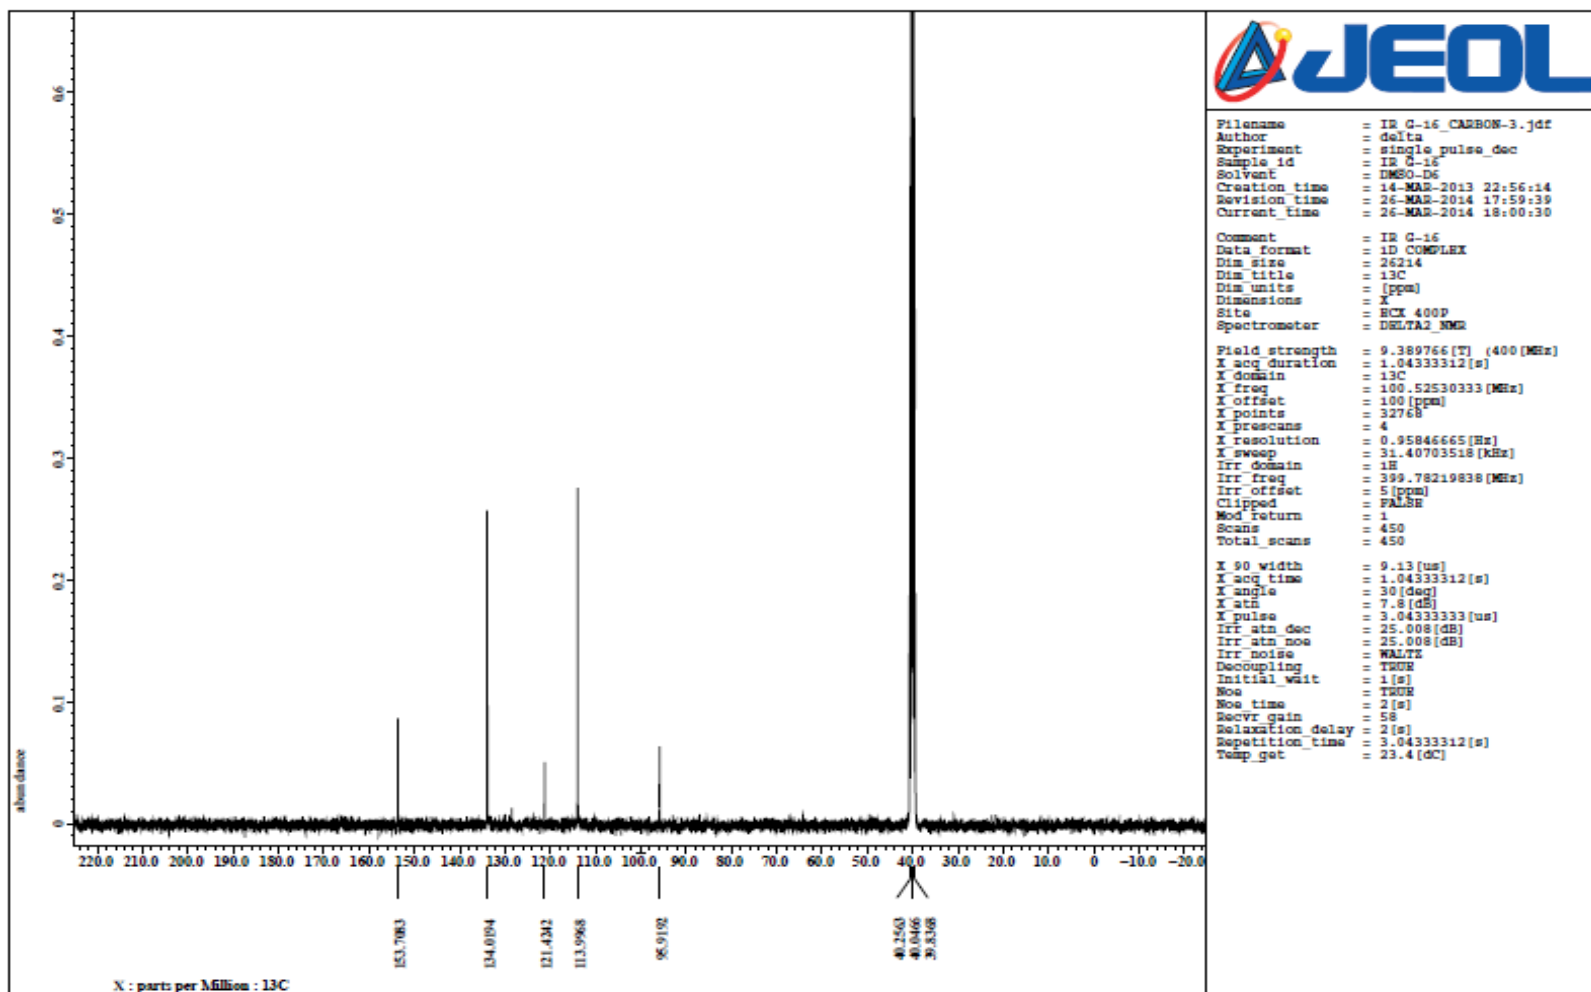

IR spectra of 5b

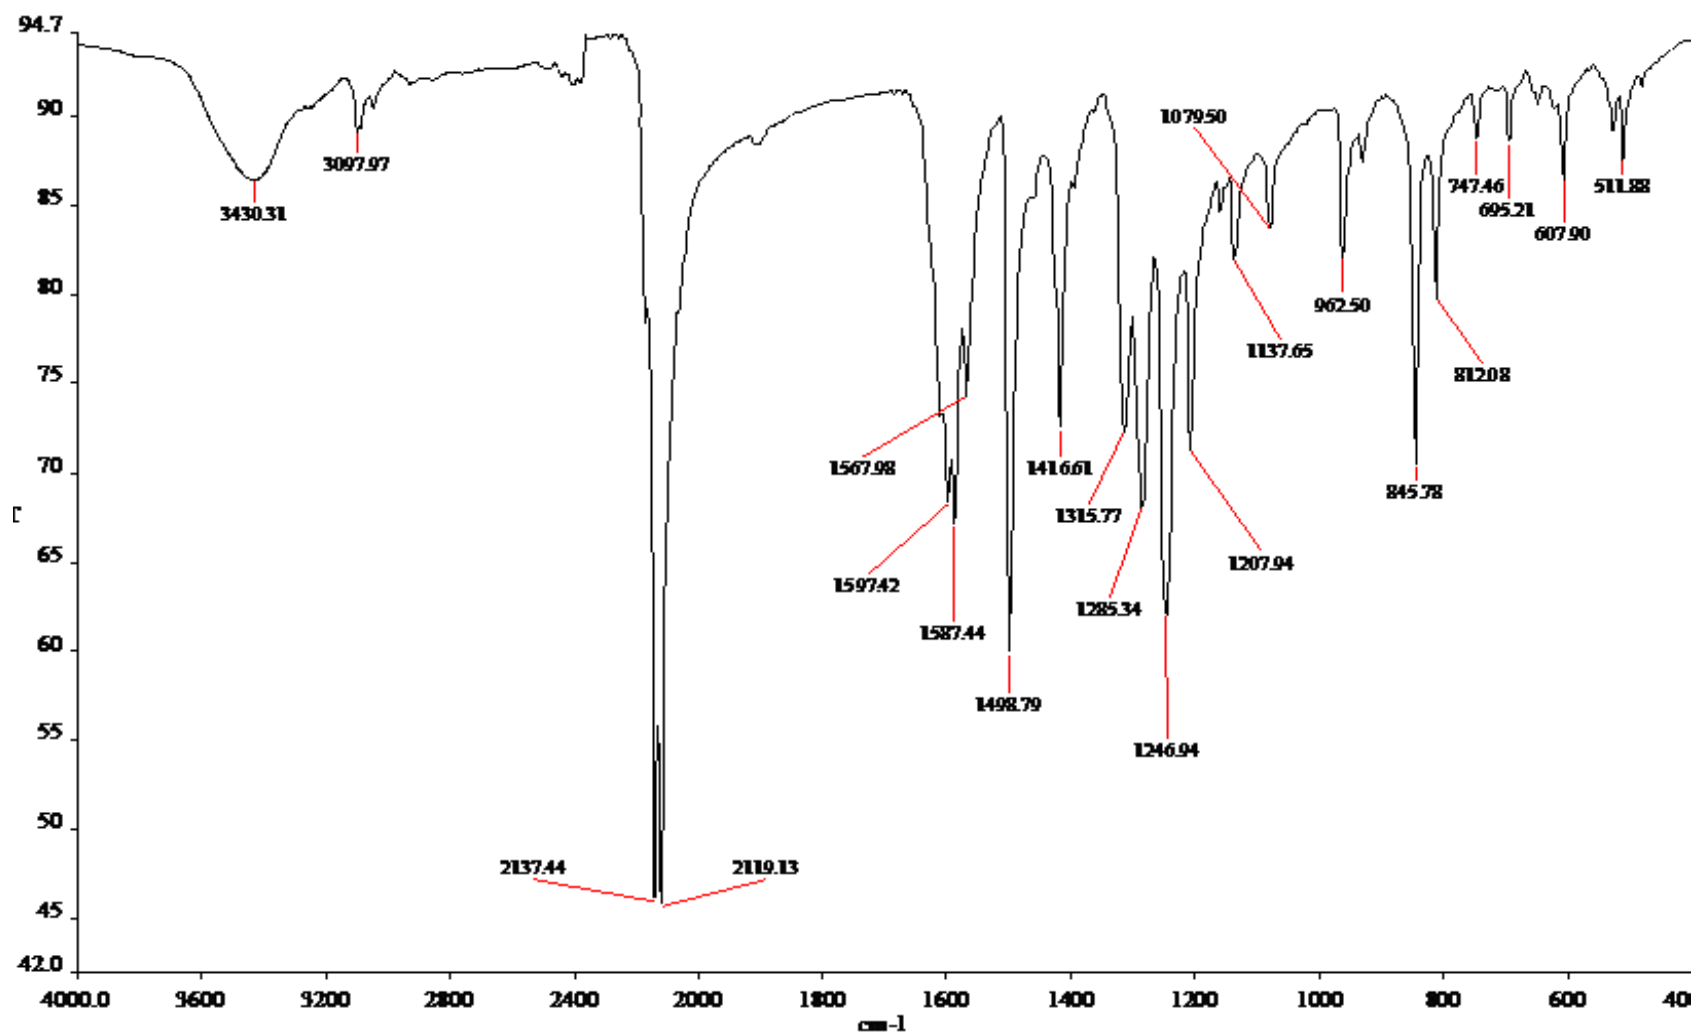



$^1\text{H}$  NMR of 6b

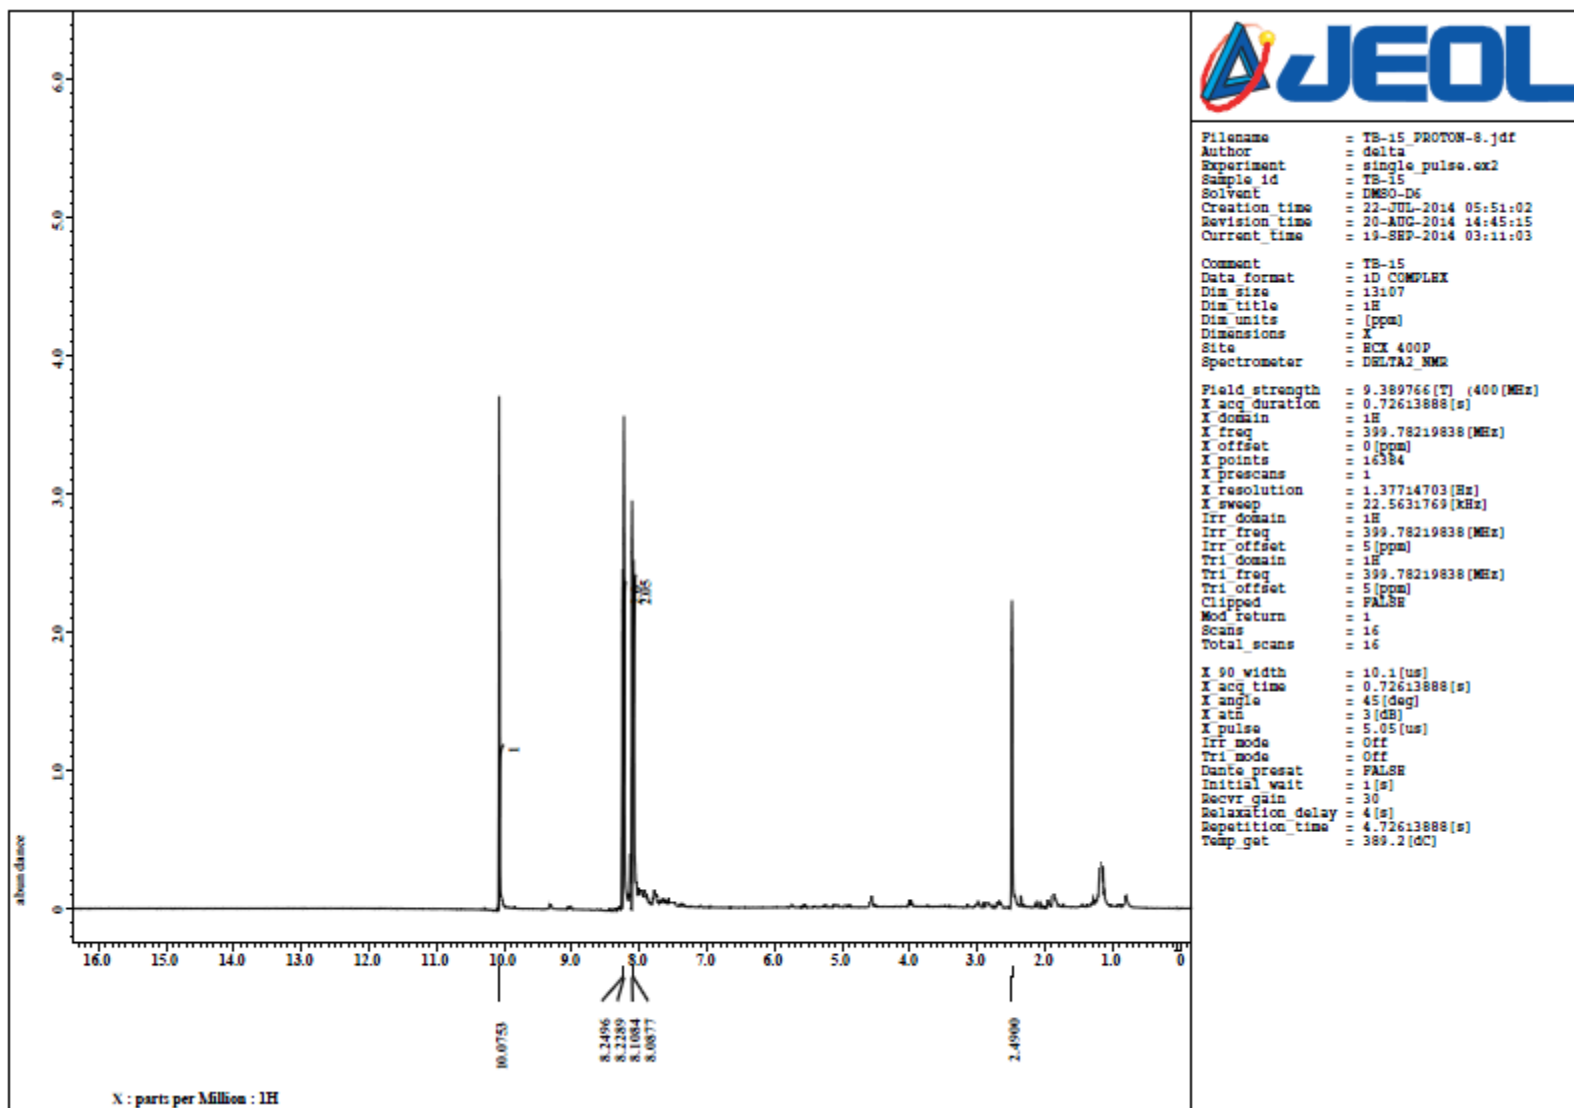

<sup>13</sup>C NMR of 6b

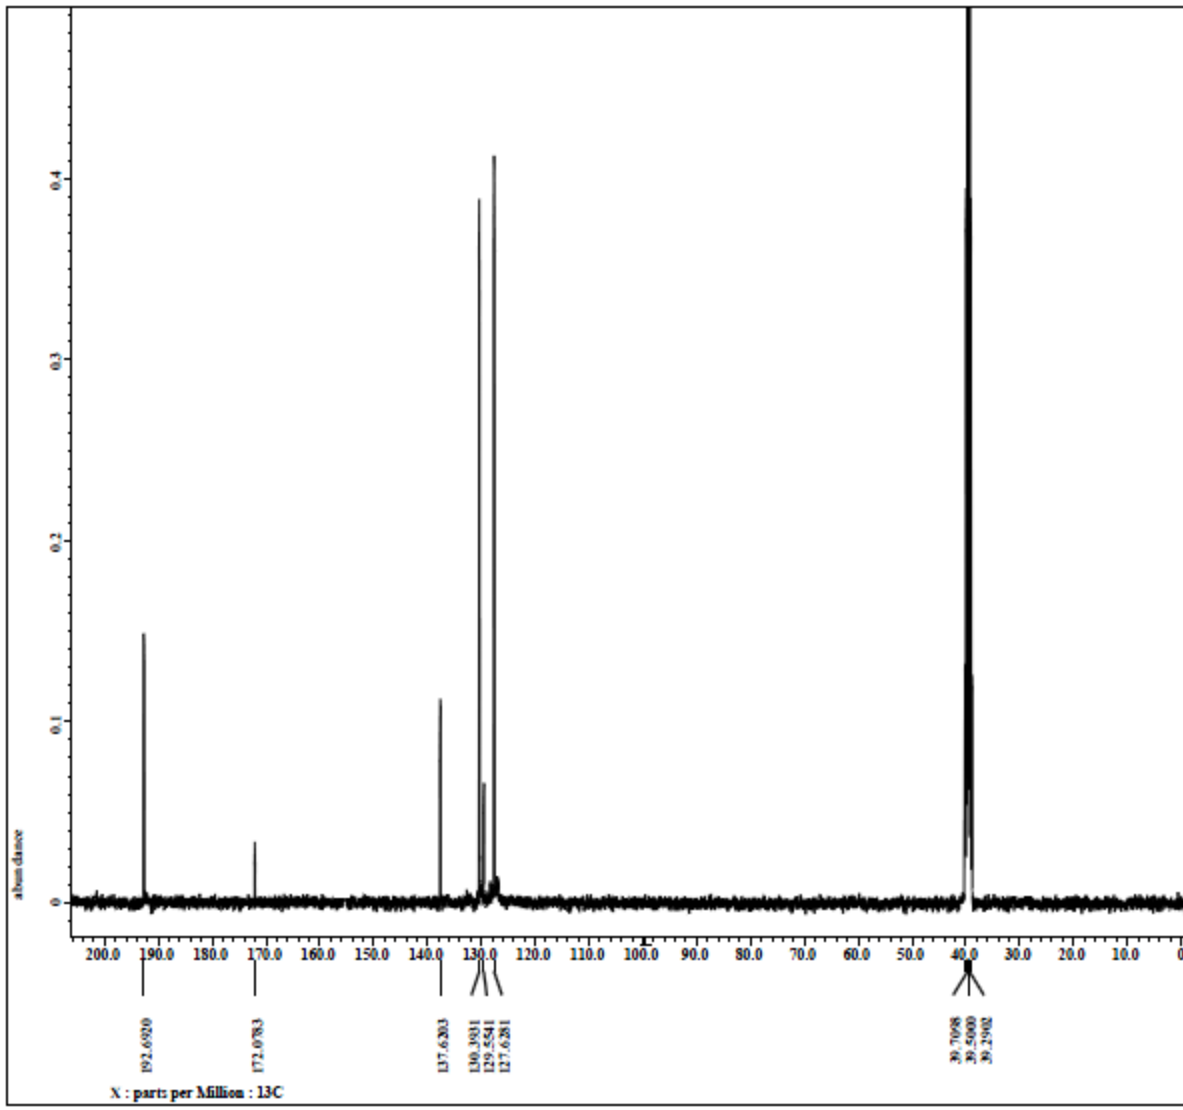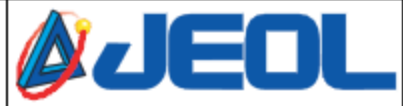

```

Filename      = TB-15 CARBON-4.jdf
Author       = delta
Experiment   = single pulse_dec
Sample id    = TB-15
Solvent      = DMSO-D6
Creation time = 22-JUL-2014 06:11:58
Revision time = 20-AUG-2014 14:39:52
Current time  = 19-SEP-2014 03:23:57

Comment      = TB-15
Data format  = 1D COMPLEX
Dim size     = 26214
Dim title    = 13C
Dim units    = [ppm]
Dimensions   = X
Site         = BCK 400P
Spectrometer = DELTA2 NMR

Field strength = 9.389766(T) (400(MHz))
X acq duration = 1.04333312(s)
X domain      = 13C
X freq        = 100.52530333(MHz)
X offset      = 100(ppm)
X points      = 32768
X prescans    = 4
X resolution  = 0.95846665(Hz)
X sweep       = 31.40703518(KHz)
Irr domain    = 1H
Irr freq      = 399.78219838(MHz)
Irr offset    = 5(ppm)
Clipped       = FALSE
Mod return    = 1
Scans         = 400
Total_scans   = 400

X 90 width    = 11.98(us)
X acq time    = 1.04333312(s)
X angle       = 30(deg)
X atm         = 10(dB)
X pulse       = 3.99333333(us)
Irr atm_dec   = 25.52(dB)
Irr atm_noe   = 25.52(dB)
Irr noise     = WALTZ
Decoupling    = TROR
Initial_wait  = 1(s)
Noe           = TROR
Noe time      = 2(s)
Recvr gain    = 54
Relaxation_delay = 2(s)
Repetition_time = 3.04333312(s)
Temp_get      = 388.5(dC)
  
```

IR spectra of 6b

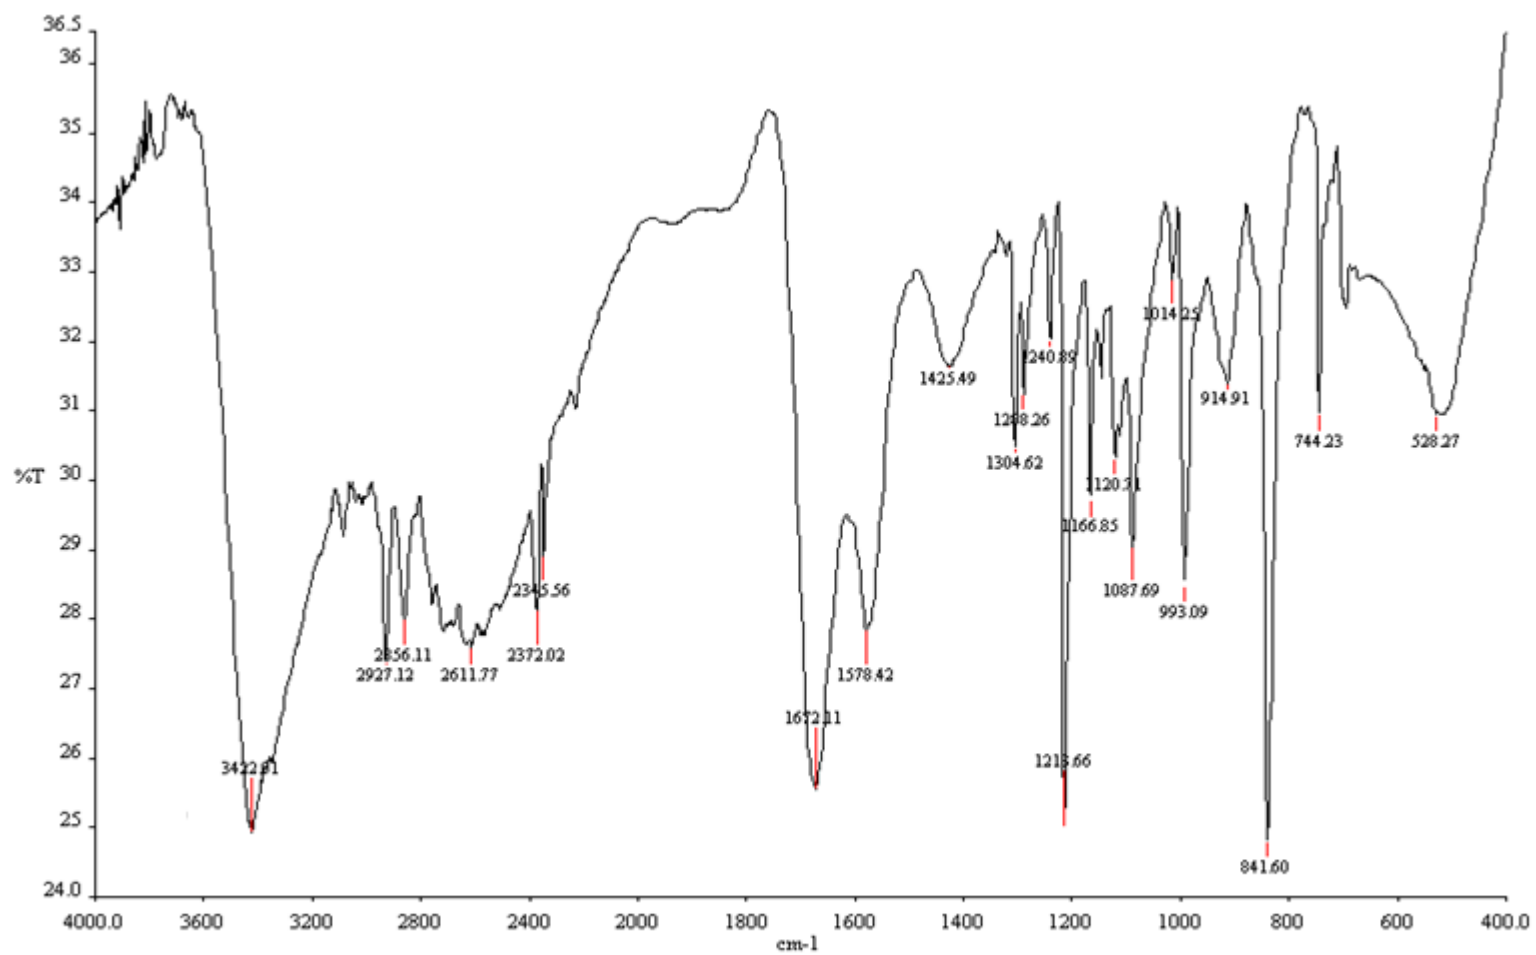

<sup>1</sup>H NMR of 7b

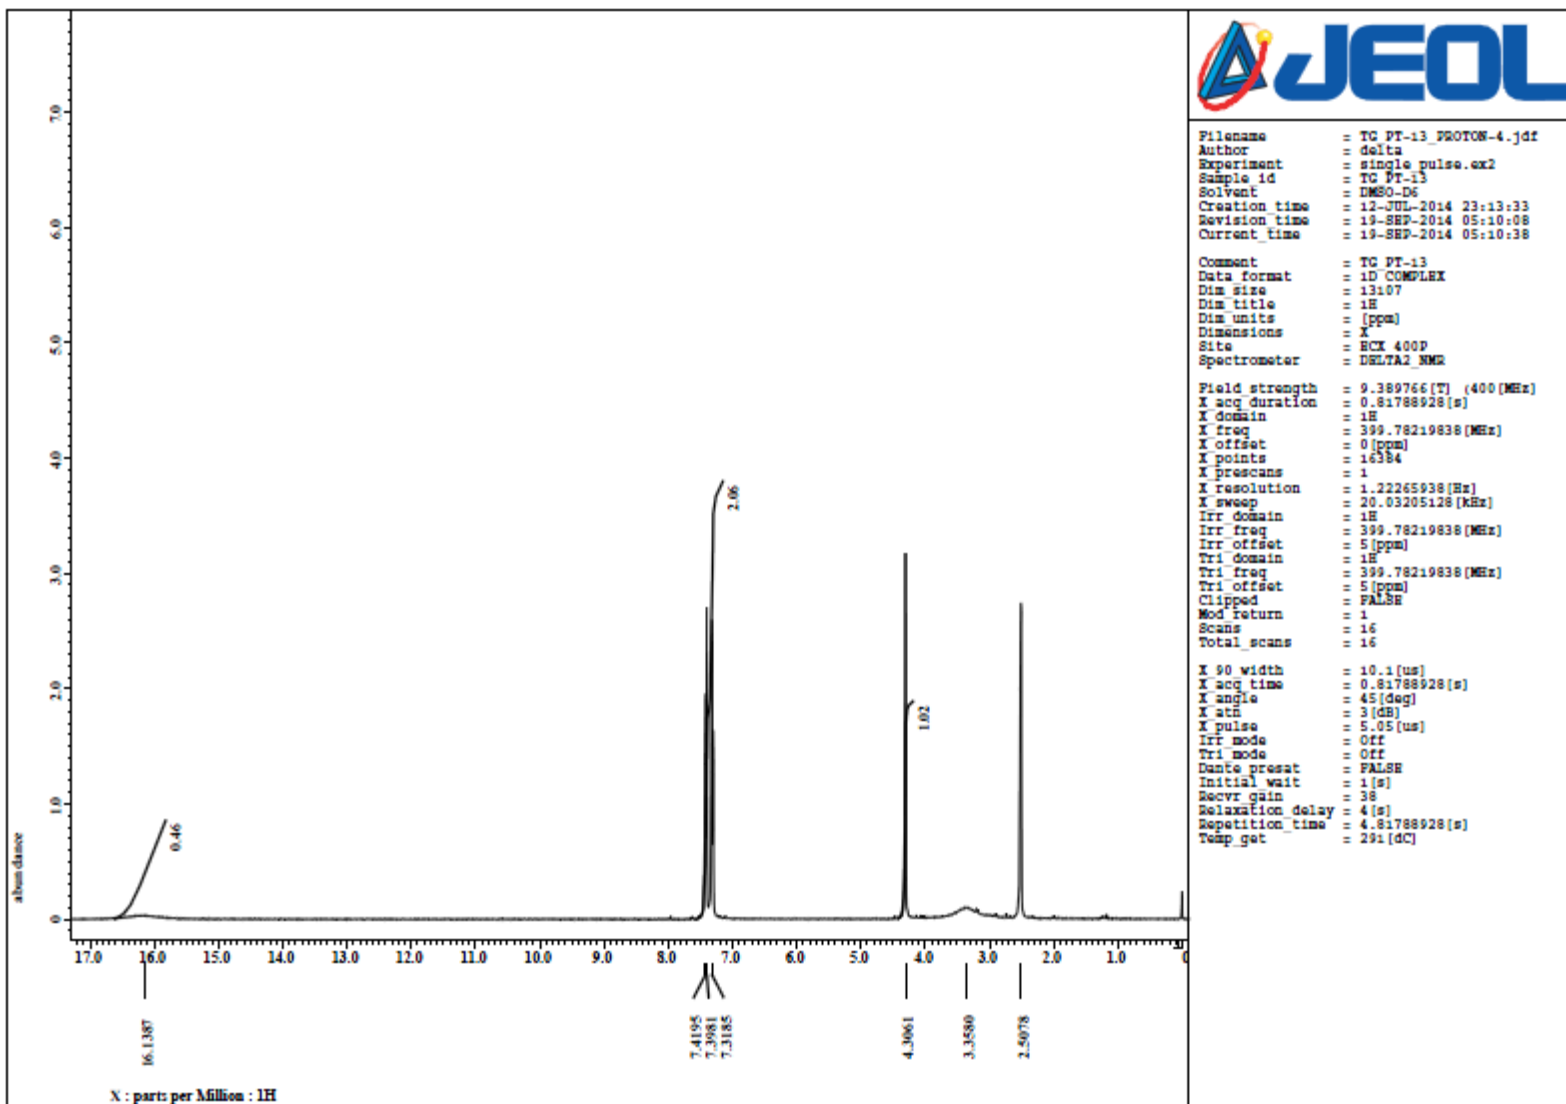

<sup>13</sup>C NMR of 7b

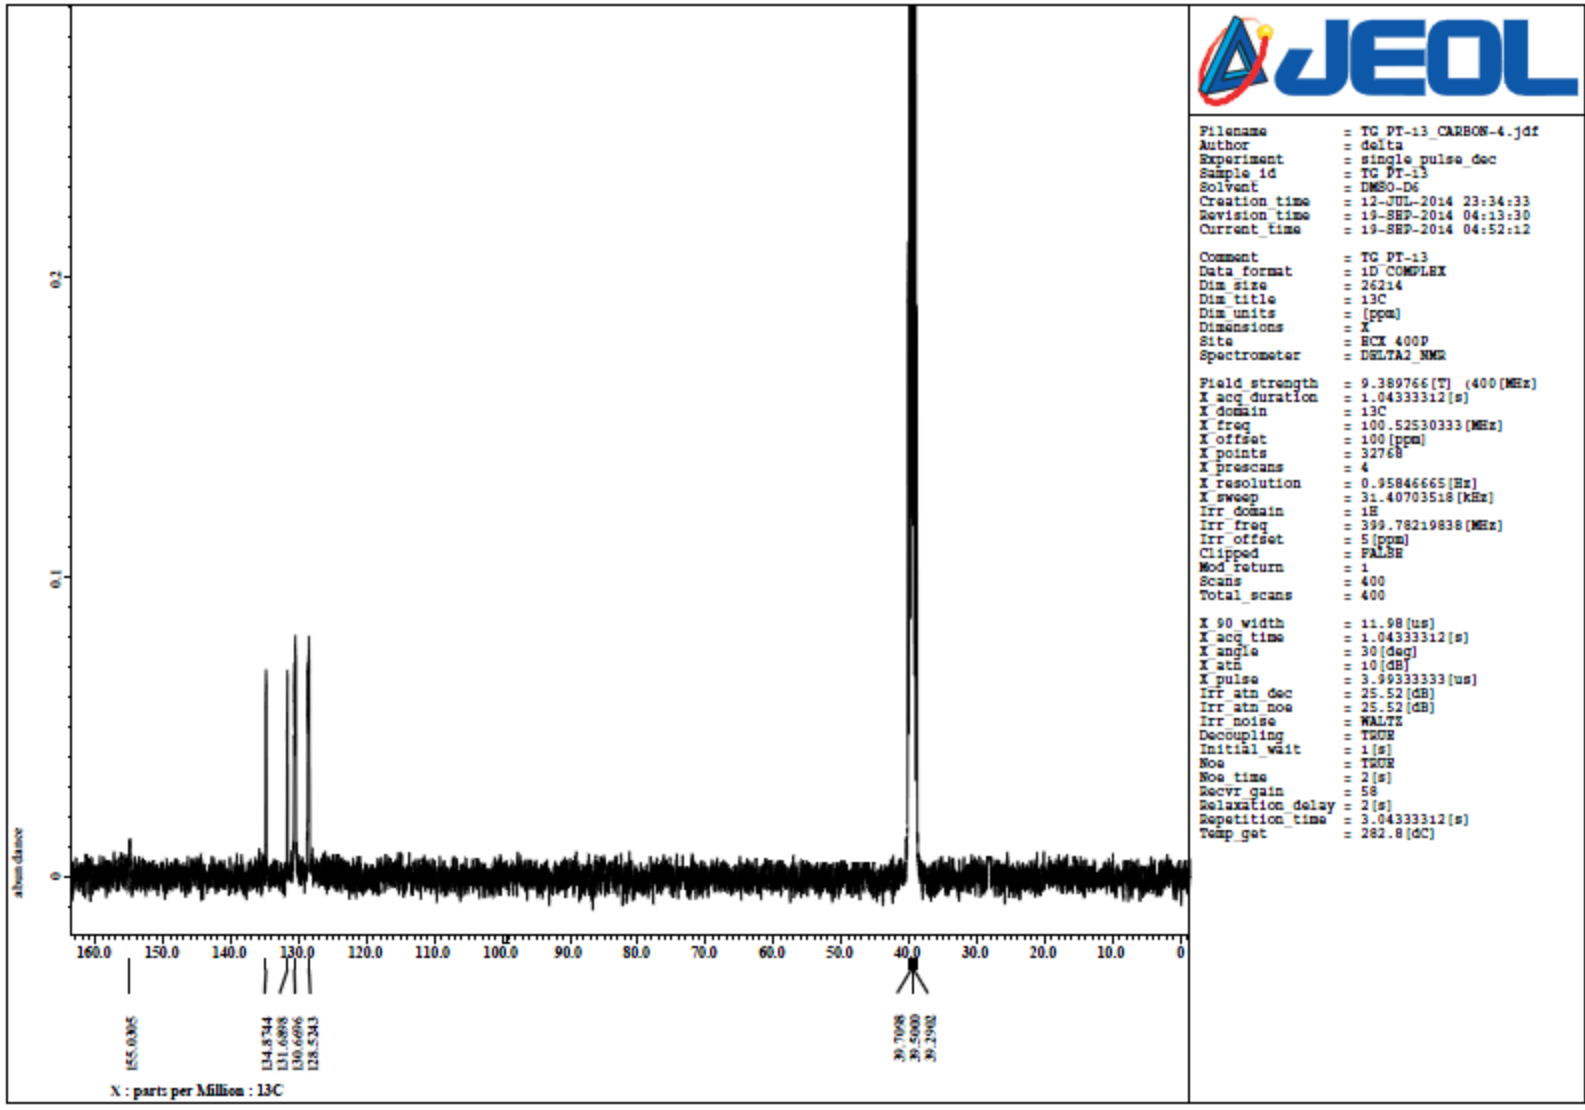

IR spectra of 7b

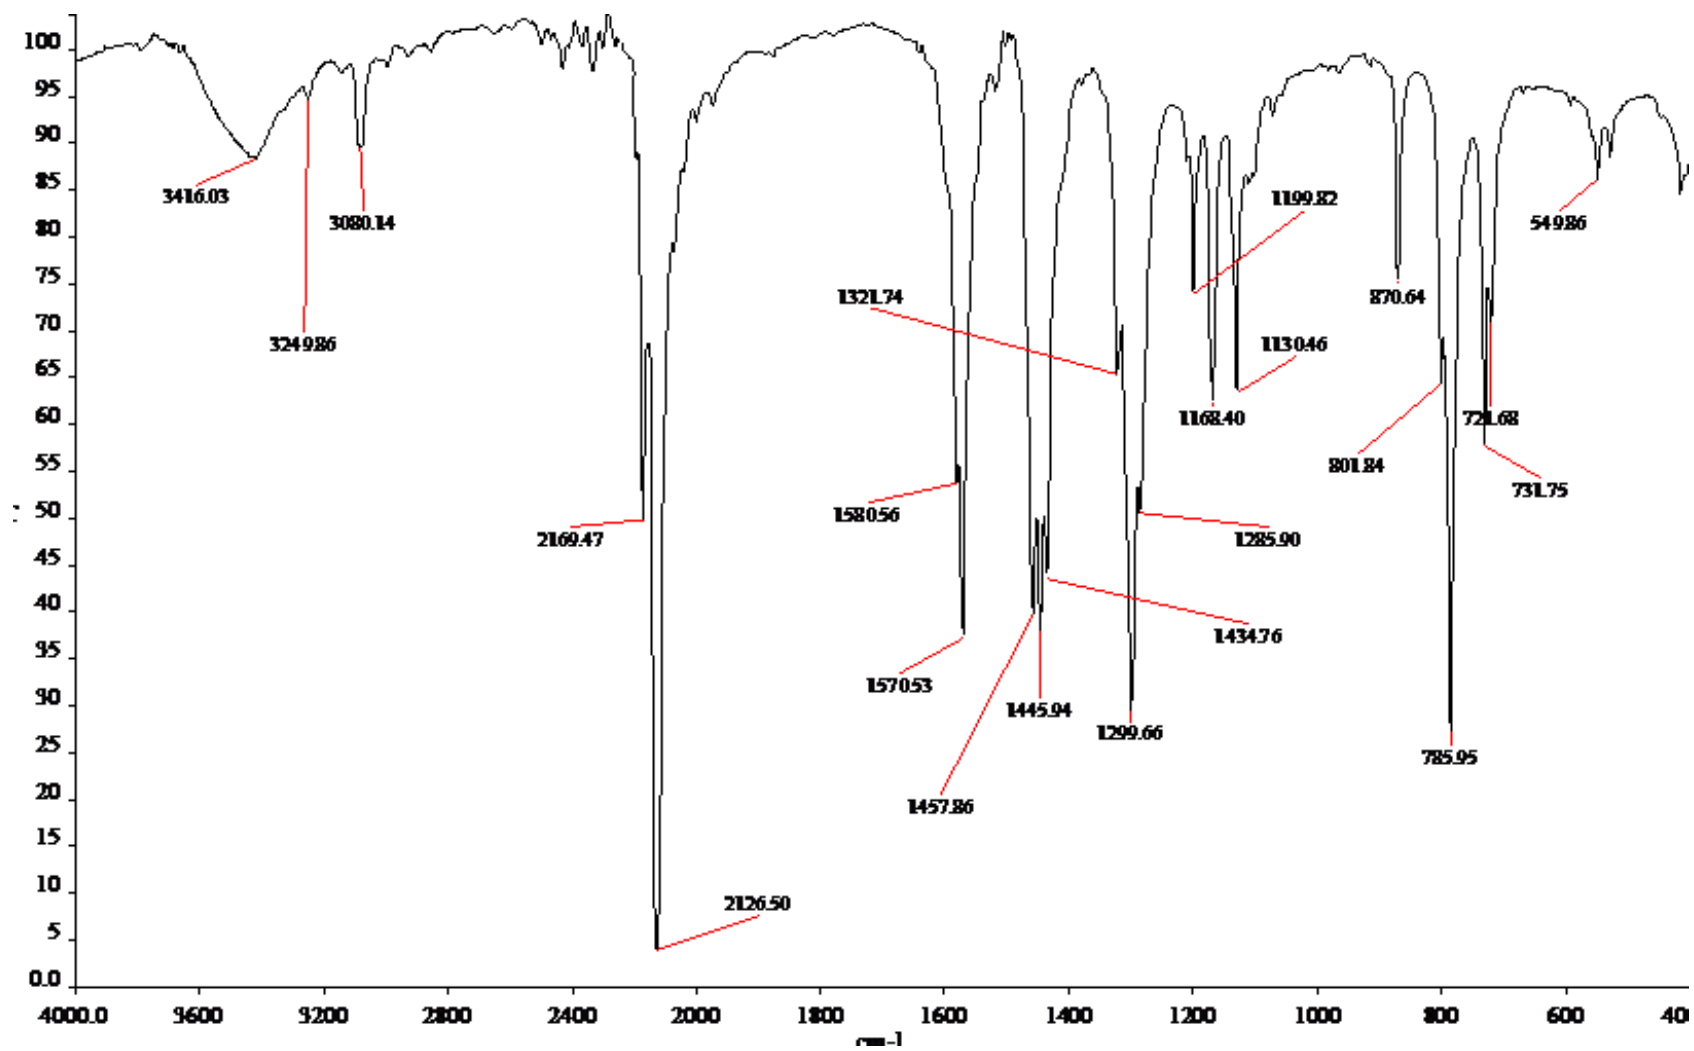

<sup>1</sup>H NMR of 8b

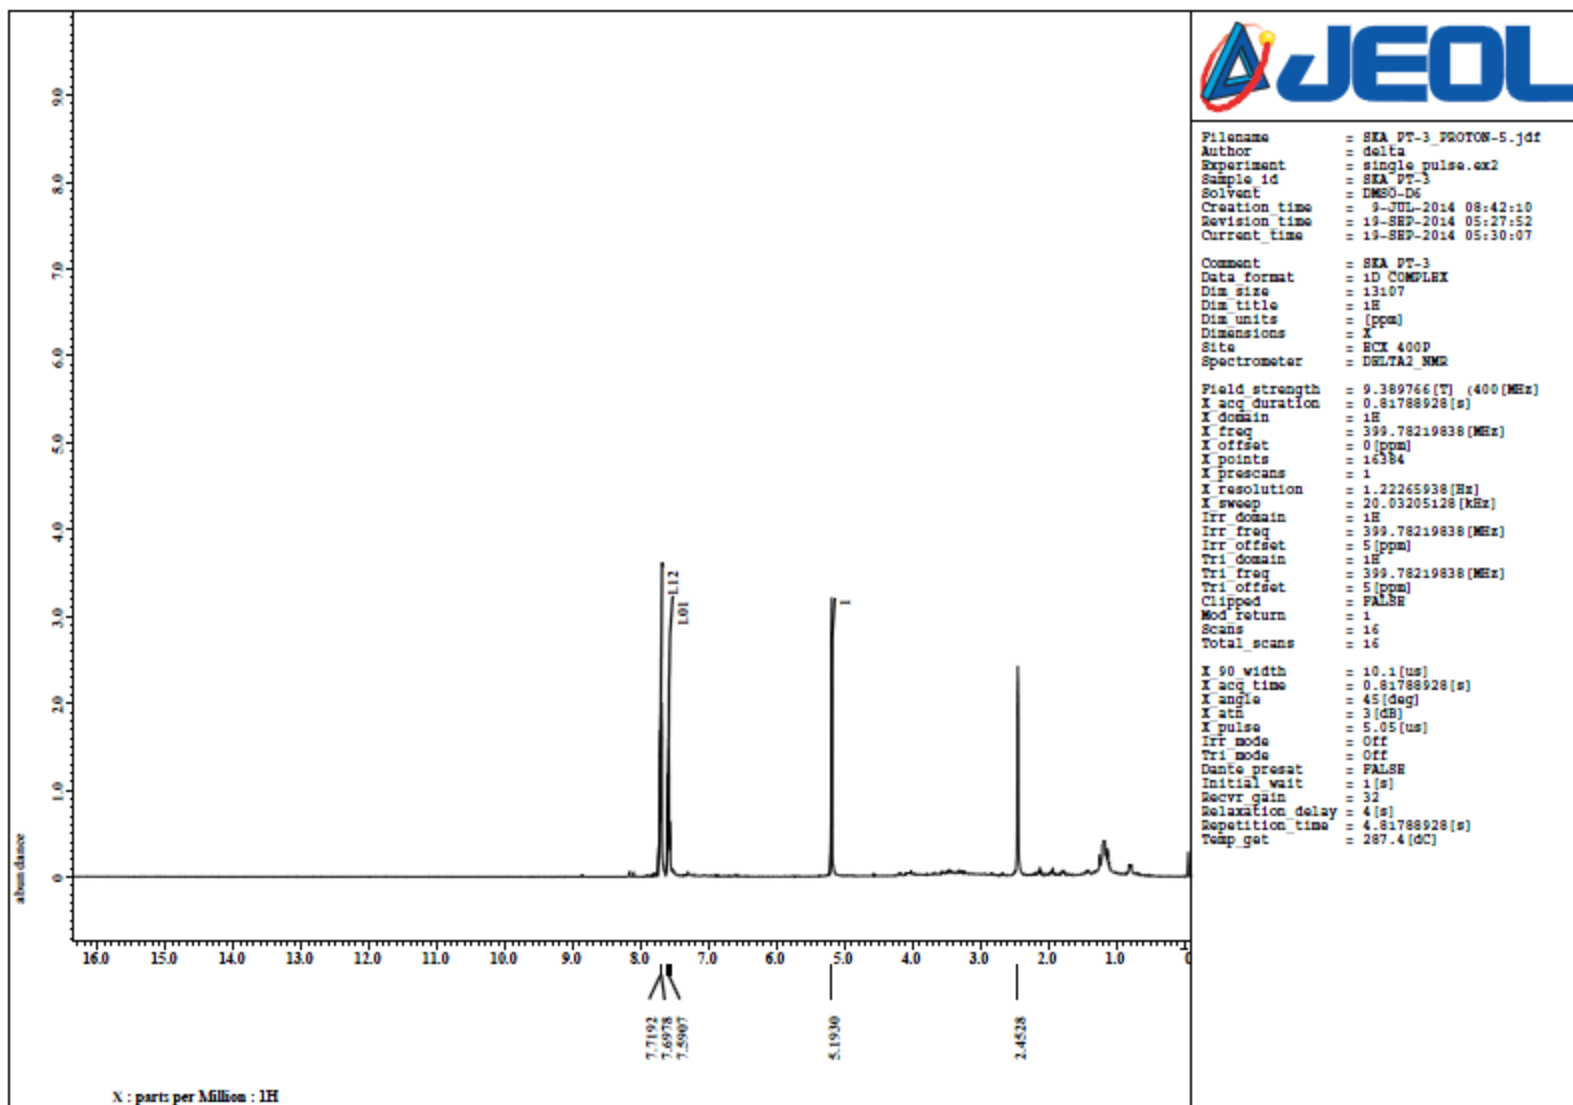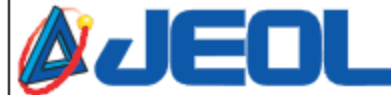

```

Filename      = SKA PT-3 PROTON-5.jdr
Author       = delta
Experiment   = single pulse.ex2
Sample id    = SKA PT-3
Solvent      = DMSO-D6
Creation time = 9-JUL-2014 08:42:10
Revision time = 19-SEP-2014 05:27:52
Current time  = 19-SEP-2014 05:30:07

Comment      = SKA PT-3
Data format  = 1D COMPLEX
Dim size     = 13107
Dim title    = 1H
Dim units    = [ppm]
Dimensions   = X
Site         = ECX 400P
Spectrometer = DELTA2 NMR

Field strength = 9.389766 [T] (400 [MHz])
X acq duration = 0.81788928 [s]
X domain      = 1H
X freq        = 399.78219838 [MHz]
X offset      = 0 [ppm]
X points      = 16384
X prescans    = 1
X resolution  = 1.22265938 [Hz]
X sweep       = 20.03205128 [kHz]
Irr domain    = 1H
Irr freq      = 399.78219838 [MHz]
Irr offset    = 5 [ppm]
Tri domain    = 1H
Tri freq      = 399.78219838 [MHz]
Tri offset    = 5 [ppm]
Clipped       = FALSE
Mod return    = 1
Scans         = 16
Total scans   = 16

X 90 width    = 10.1 [us]
X acq time    = 0.81788928 [s]
X angle       = 45 [deg]
X attn        = 3 [dB]
X pulse       = 5.05 [us]
Irr mode      = Off
Tri mode      = Off
Dante preset  = FALSE
Initial wait  = 1 [s]
Recvr gain    = 32
Relaxation delay = 4 [s]
Repetition time = 4.81788928 [s]
Temp_get      = 287.4 [C]
  
```

<sup>13</sup>C NMR of 8b



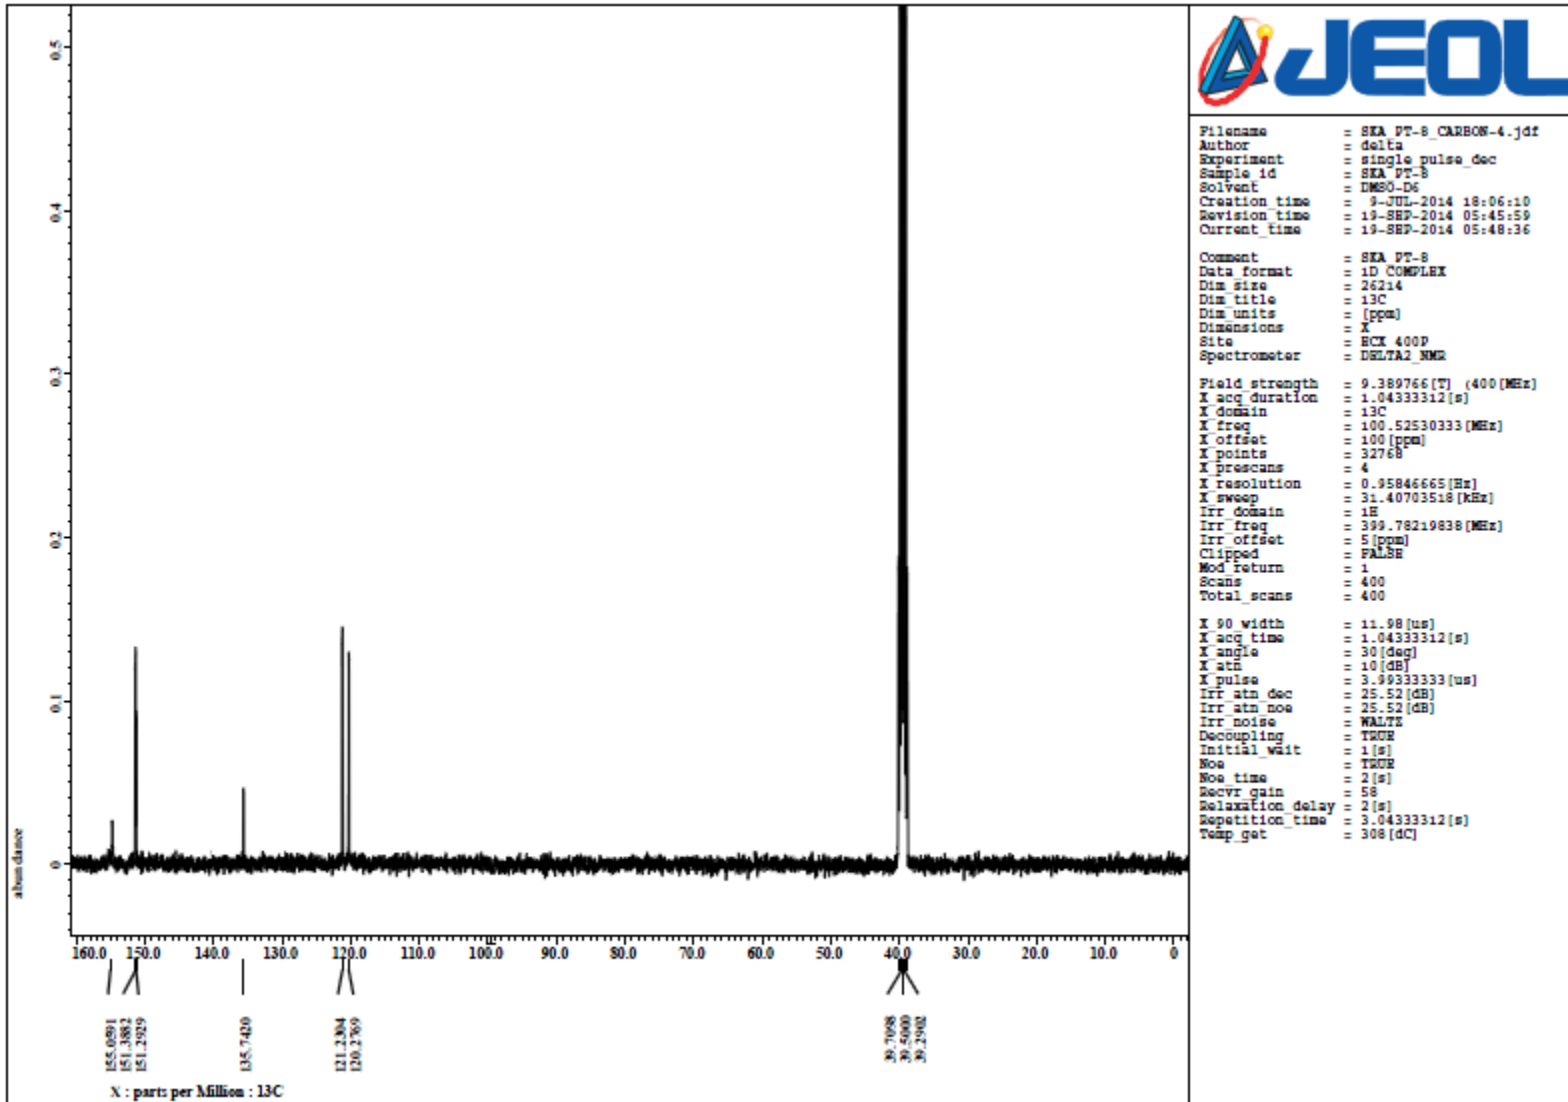

IR spectra of 8b

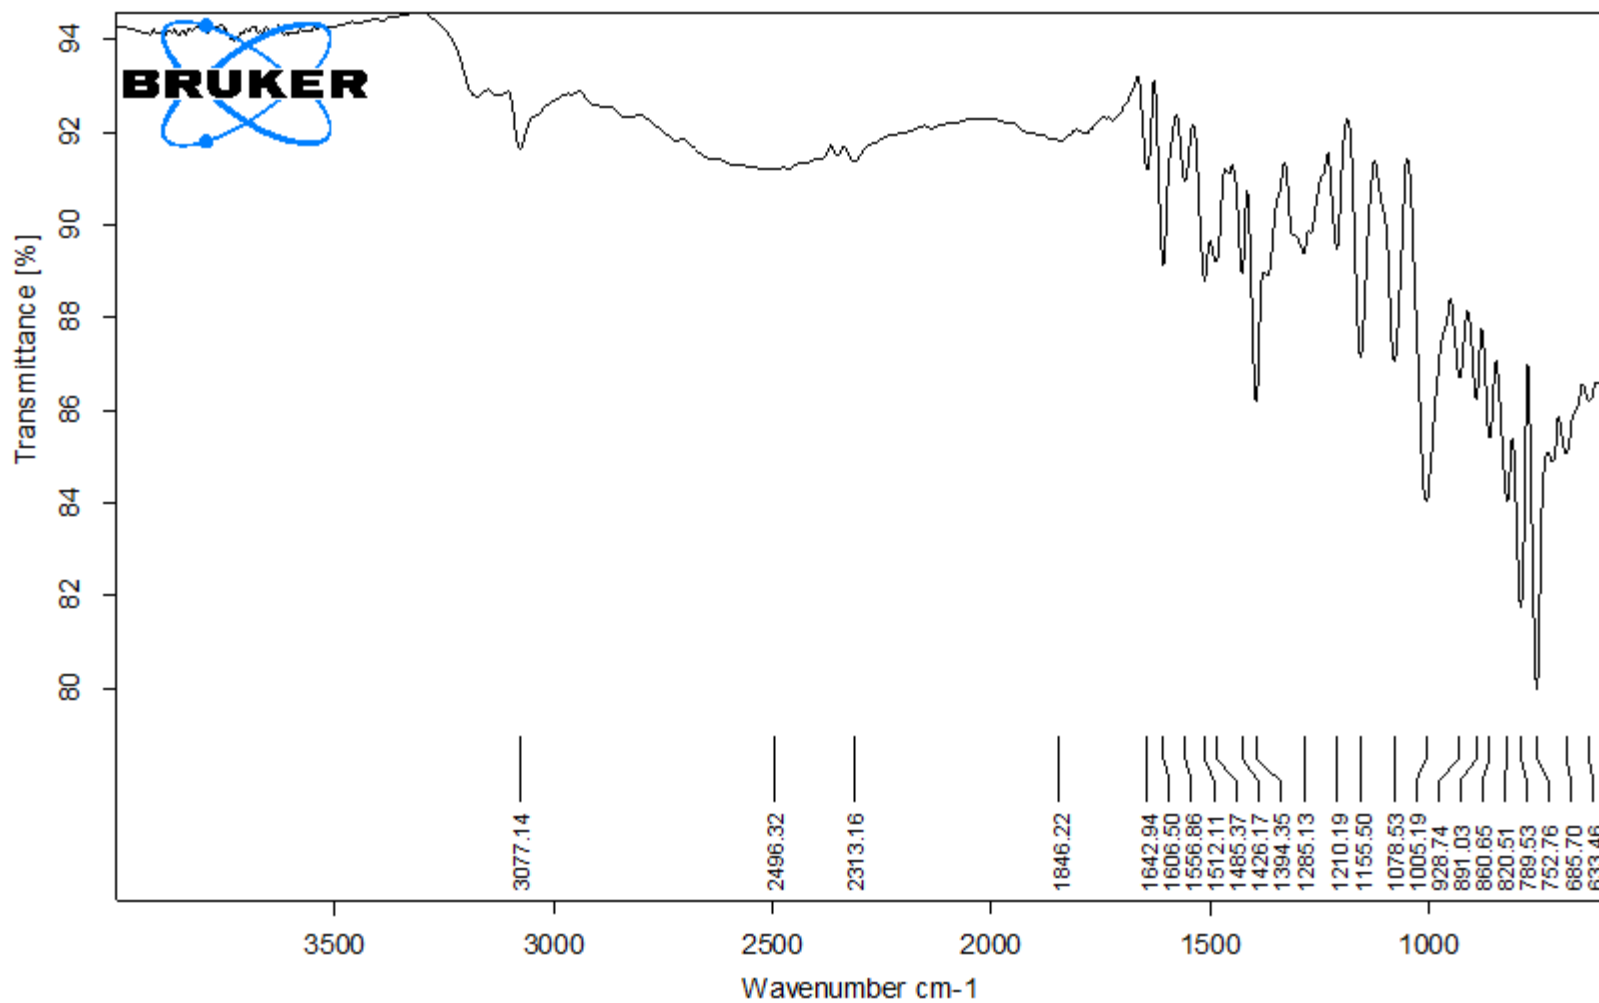

$^1\text{H}$  NMR of 9b

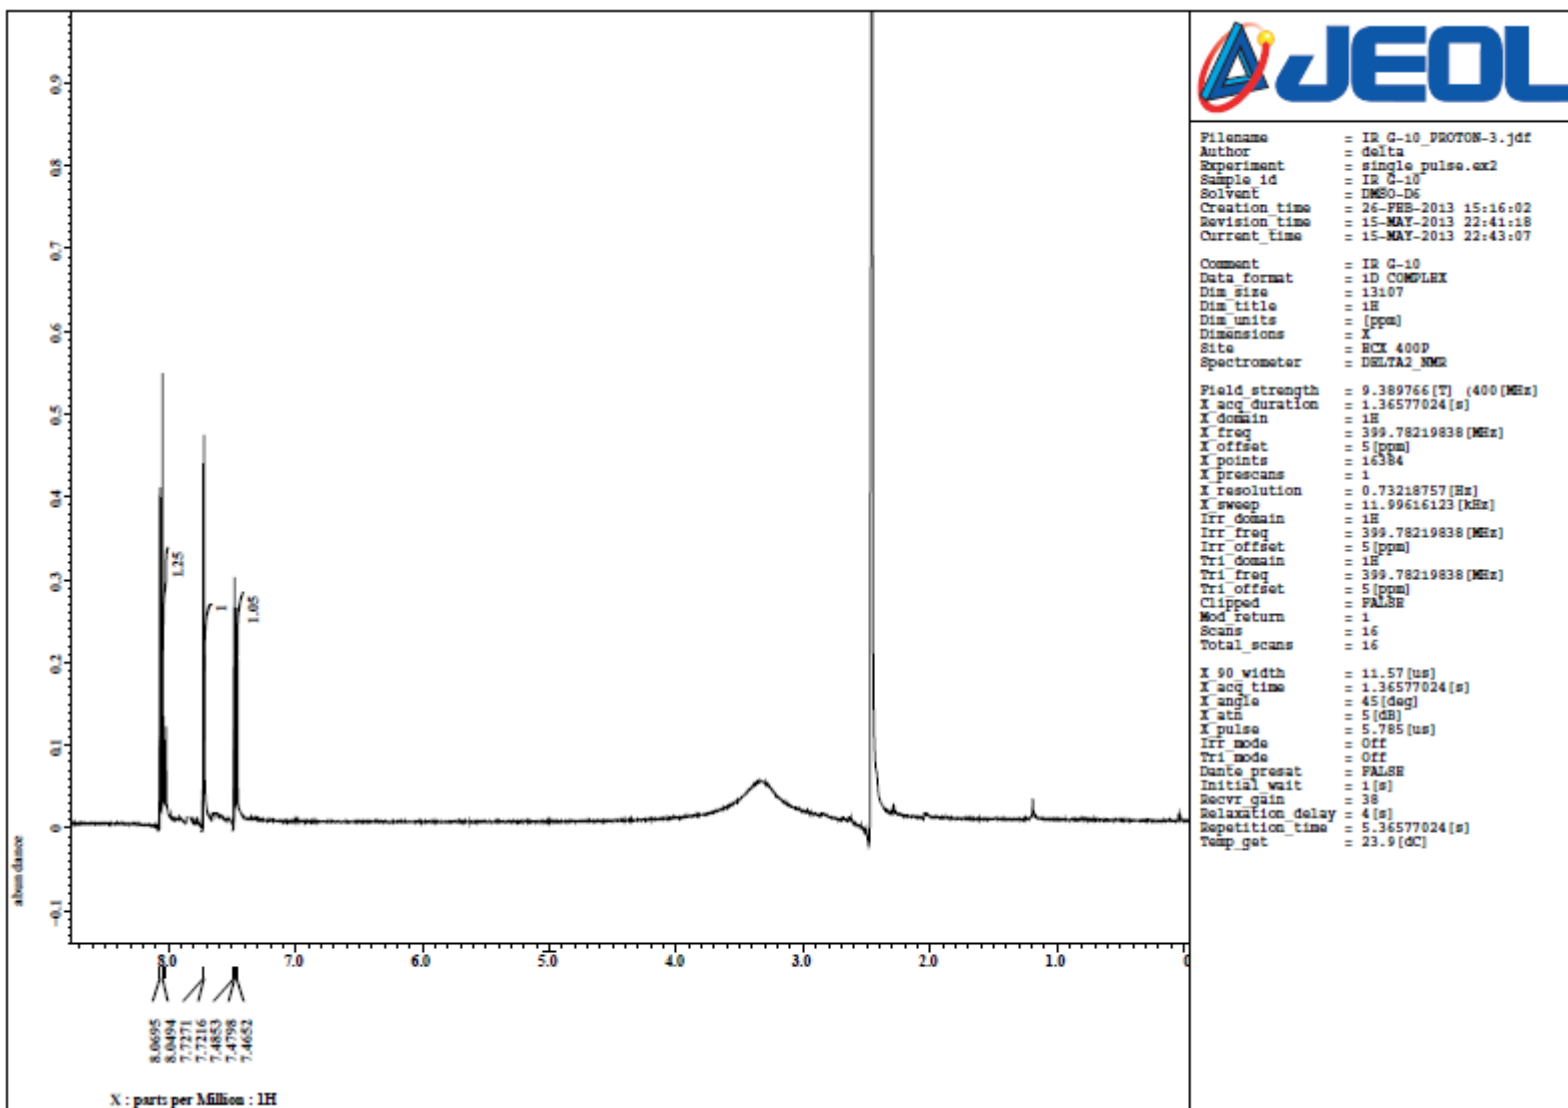

<sup>1</sup>H NMR of 9b

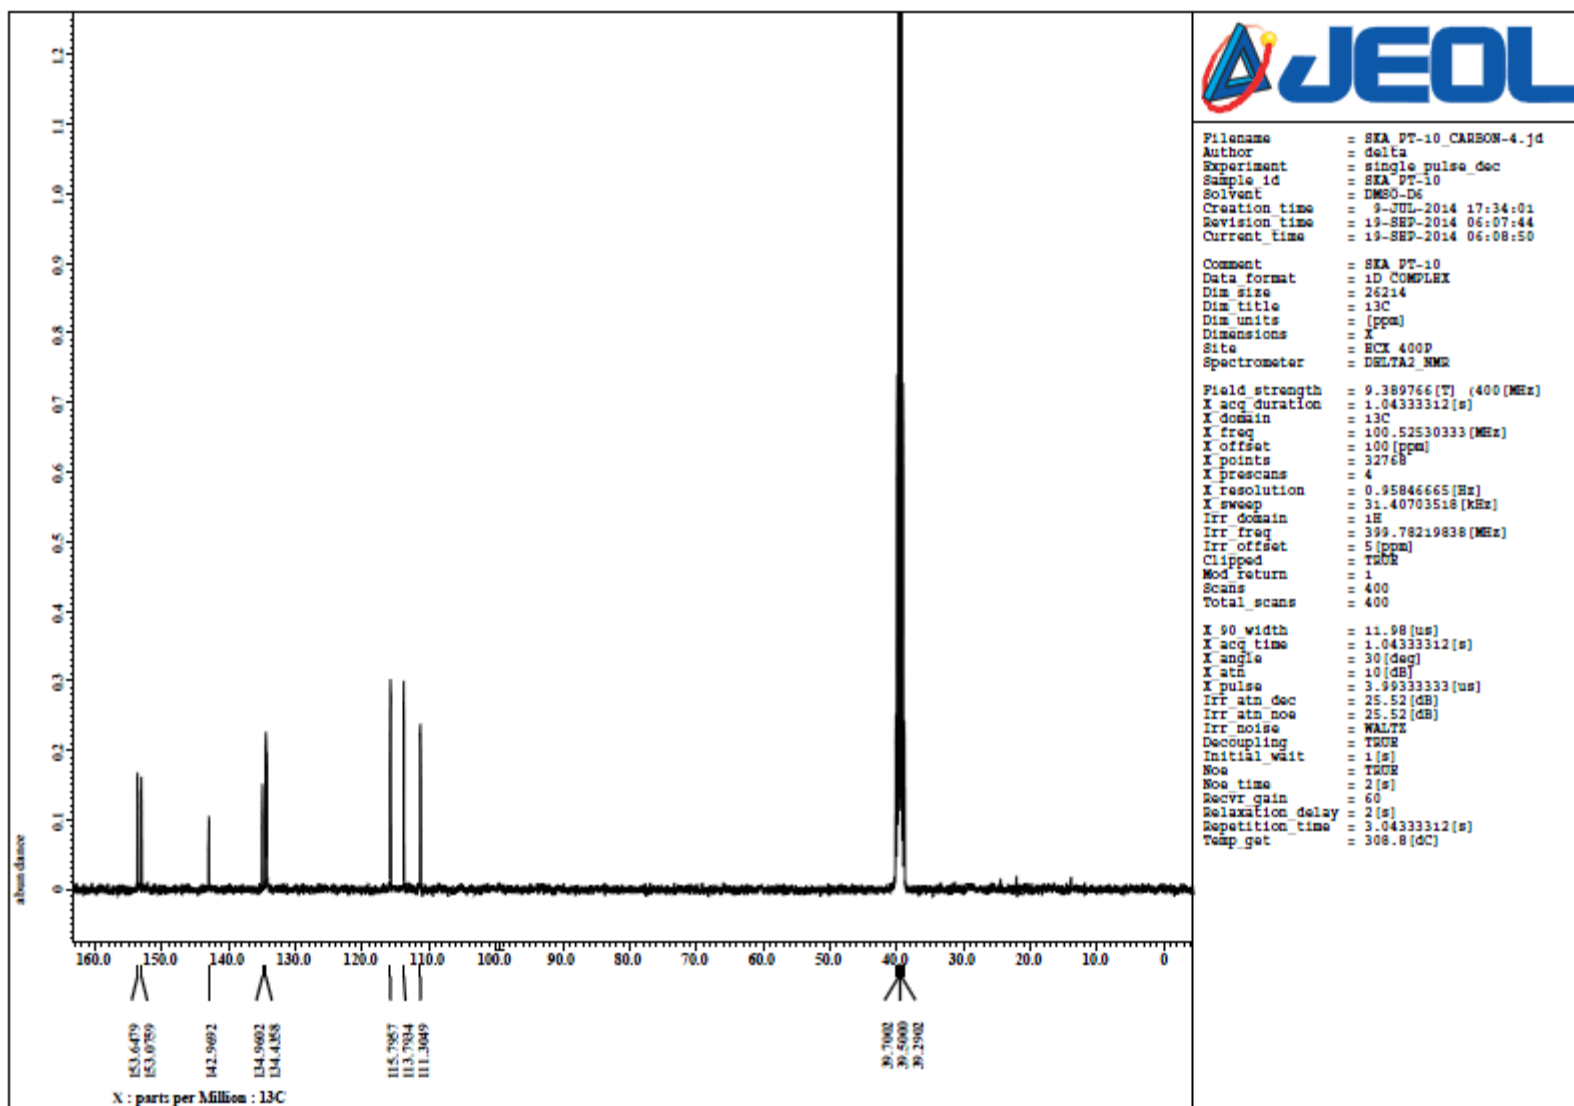

IR spectra of 9b

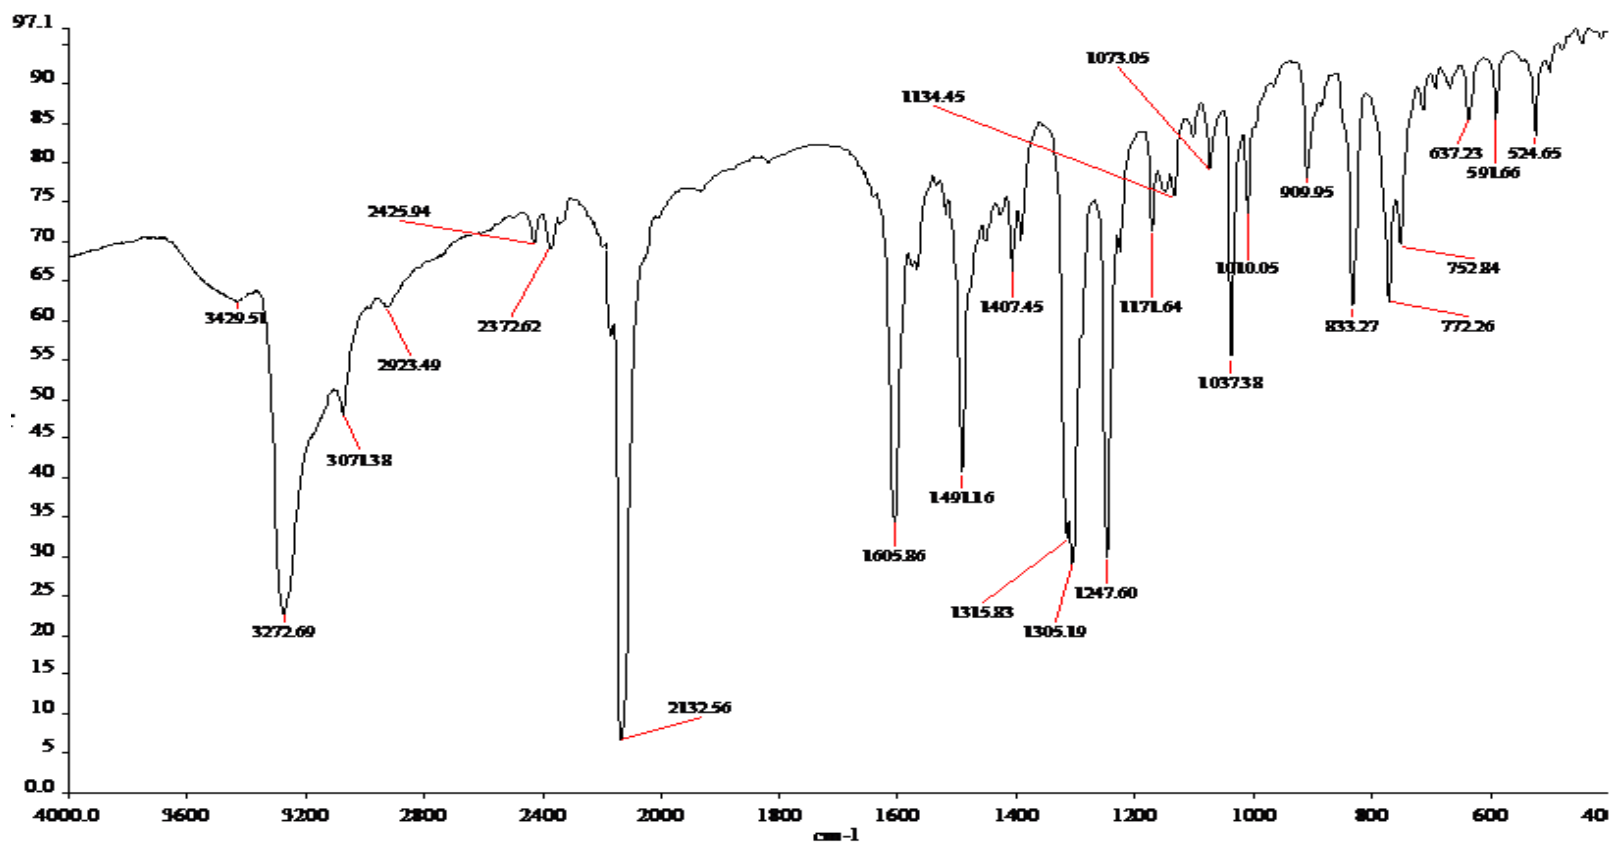

<sup>1</sup>H NMR of 10b

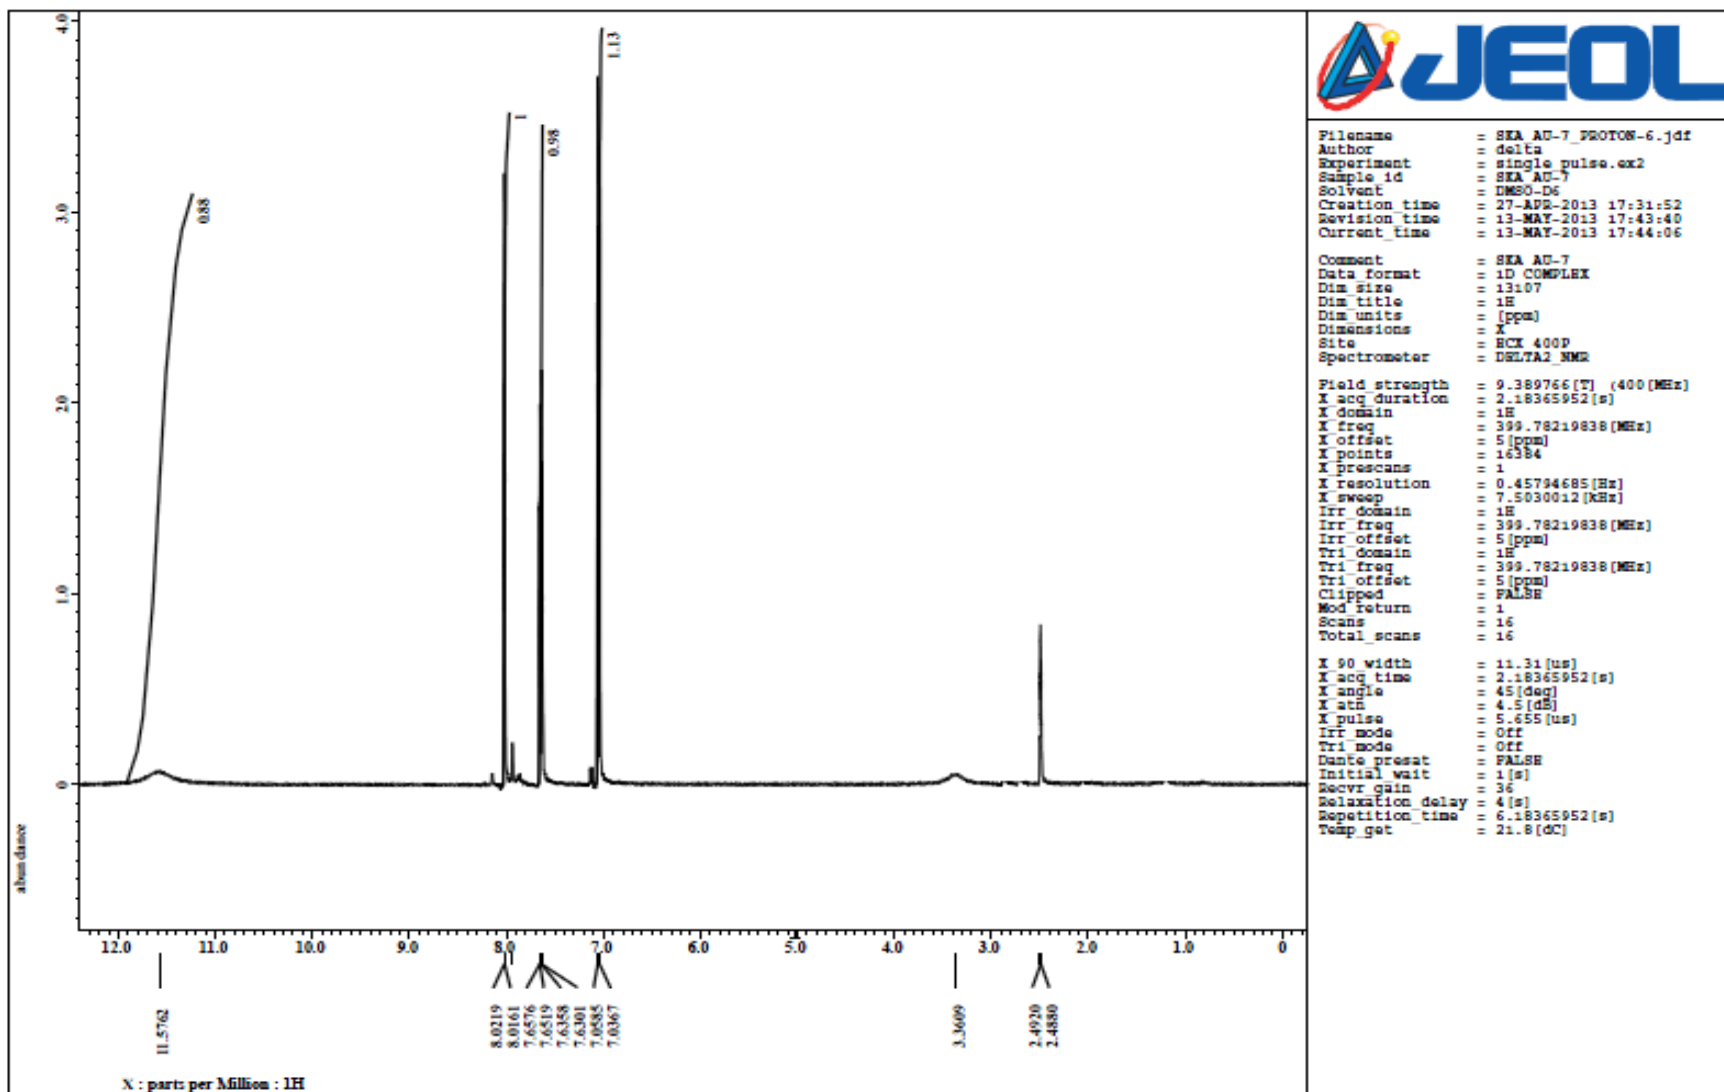

<sup>13</sup>C NMR of 10b

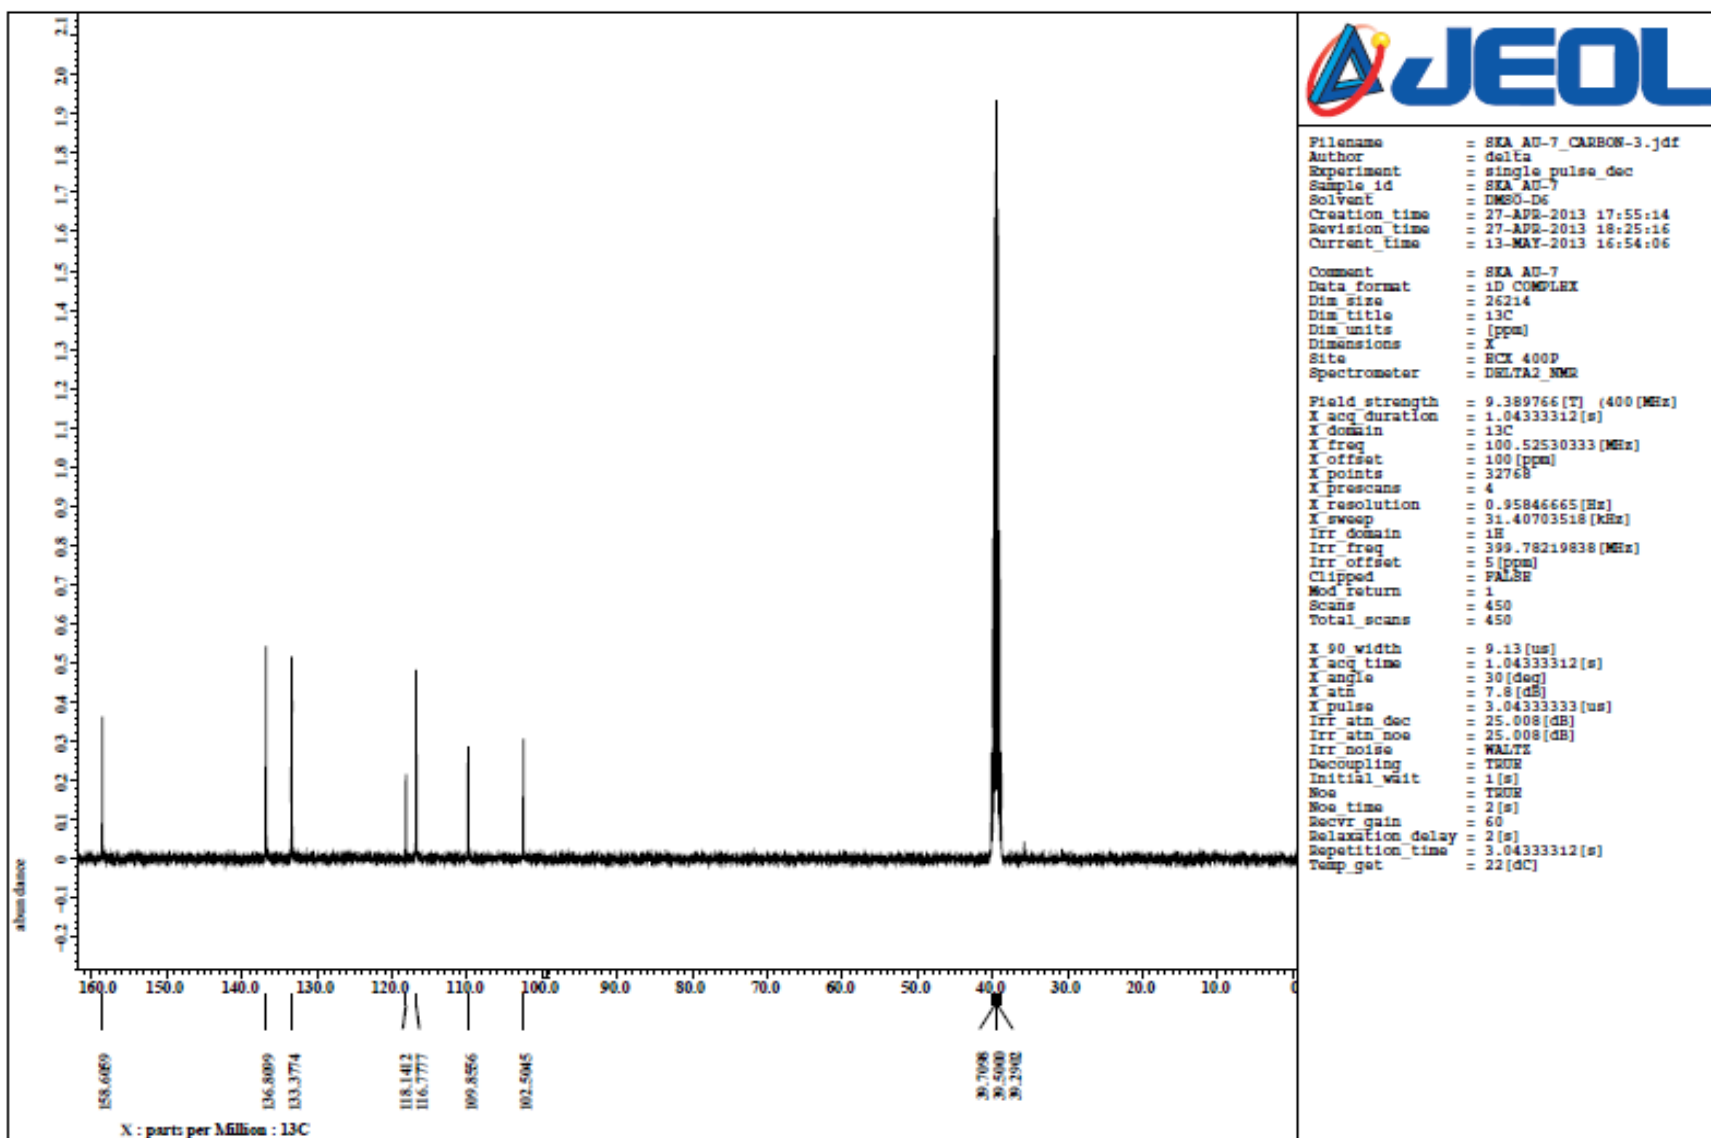

IR spectra of 10b

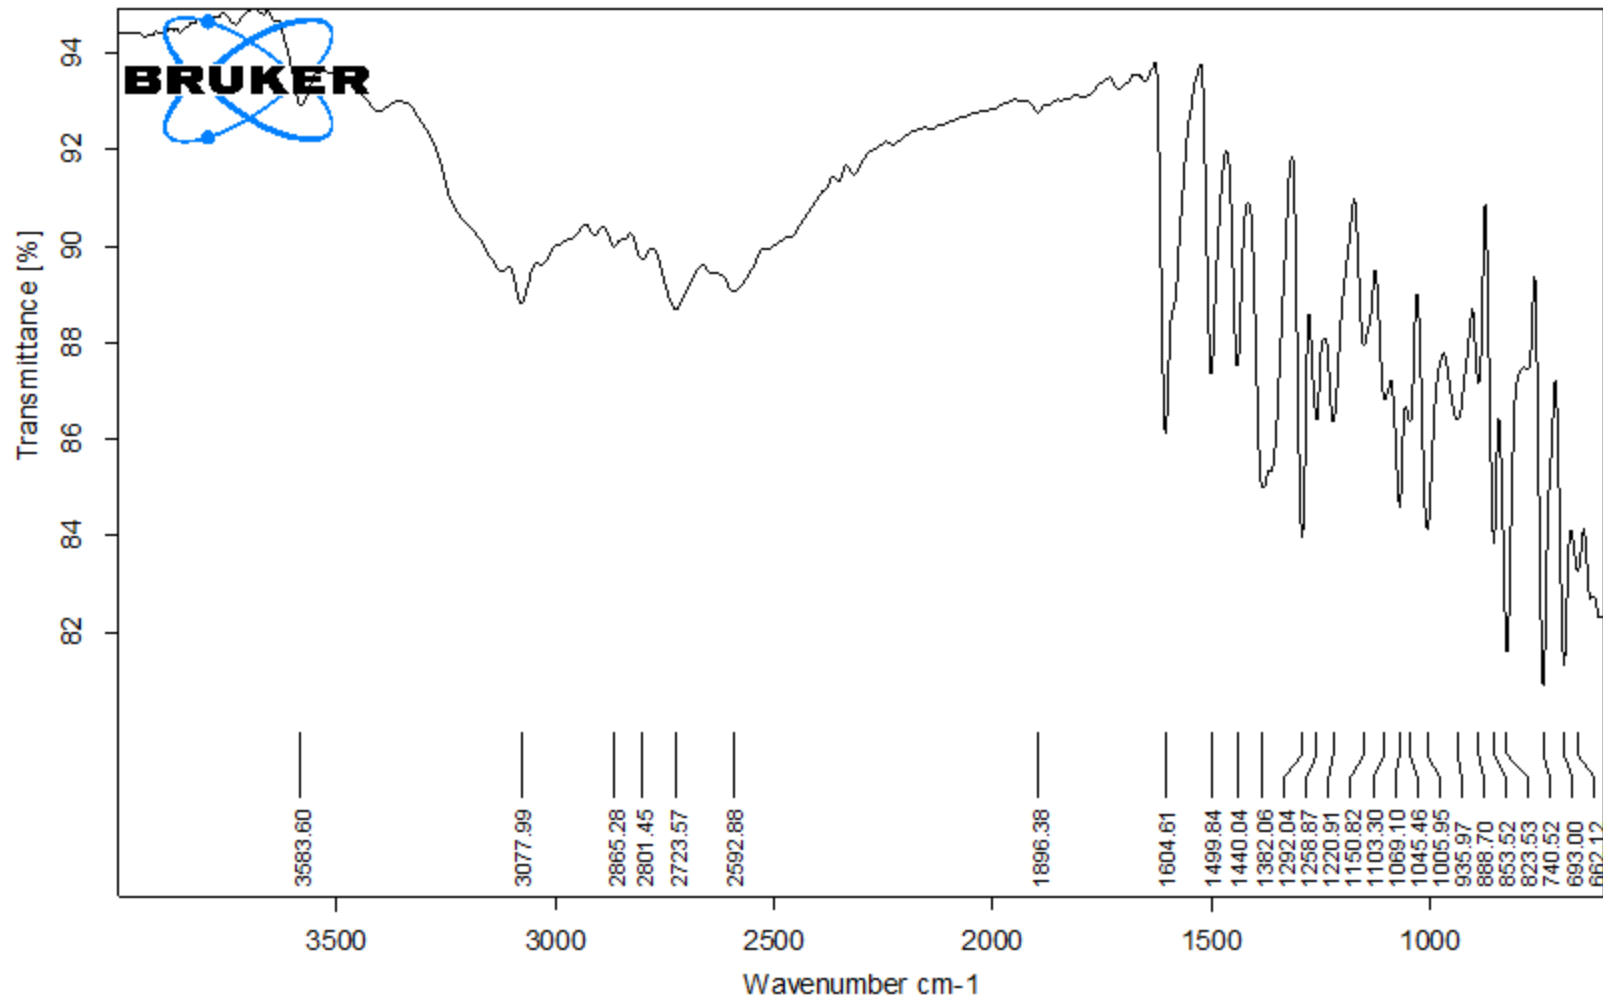

$^1\text{H}$  NMR of 11b



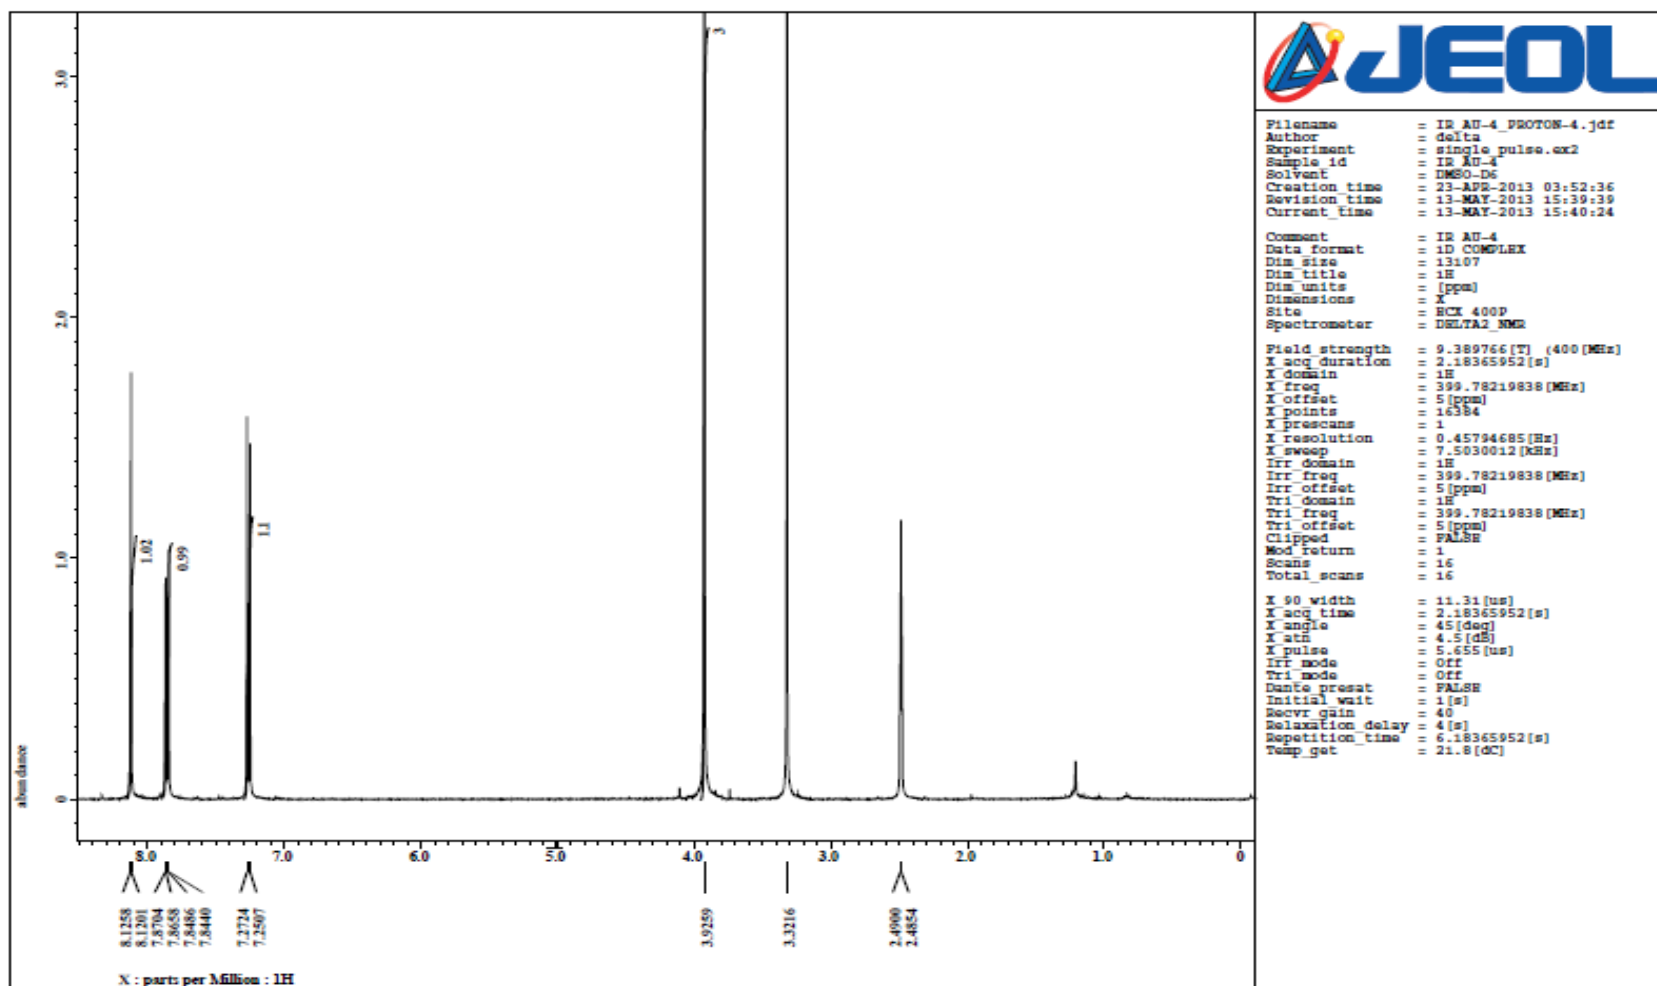

<sup>13</sup>C NMR of 11b

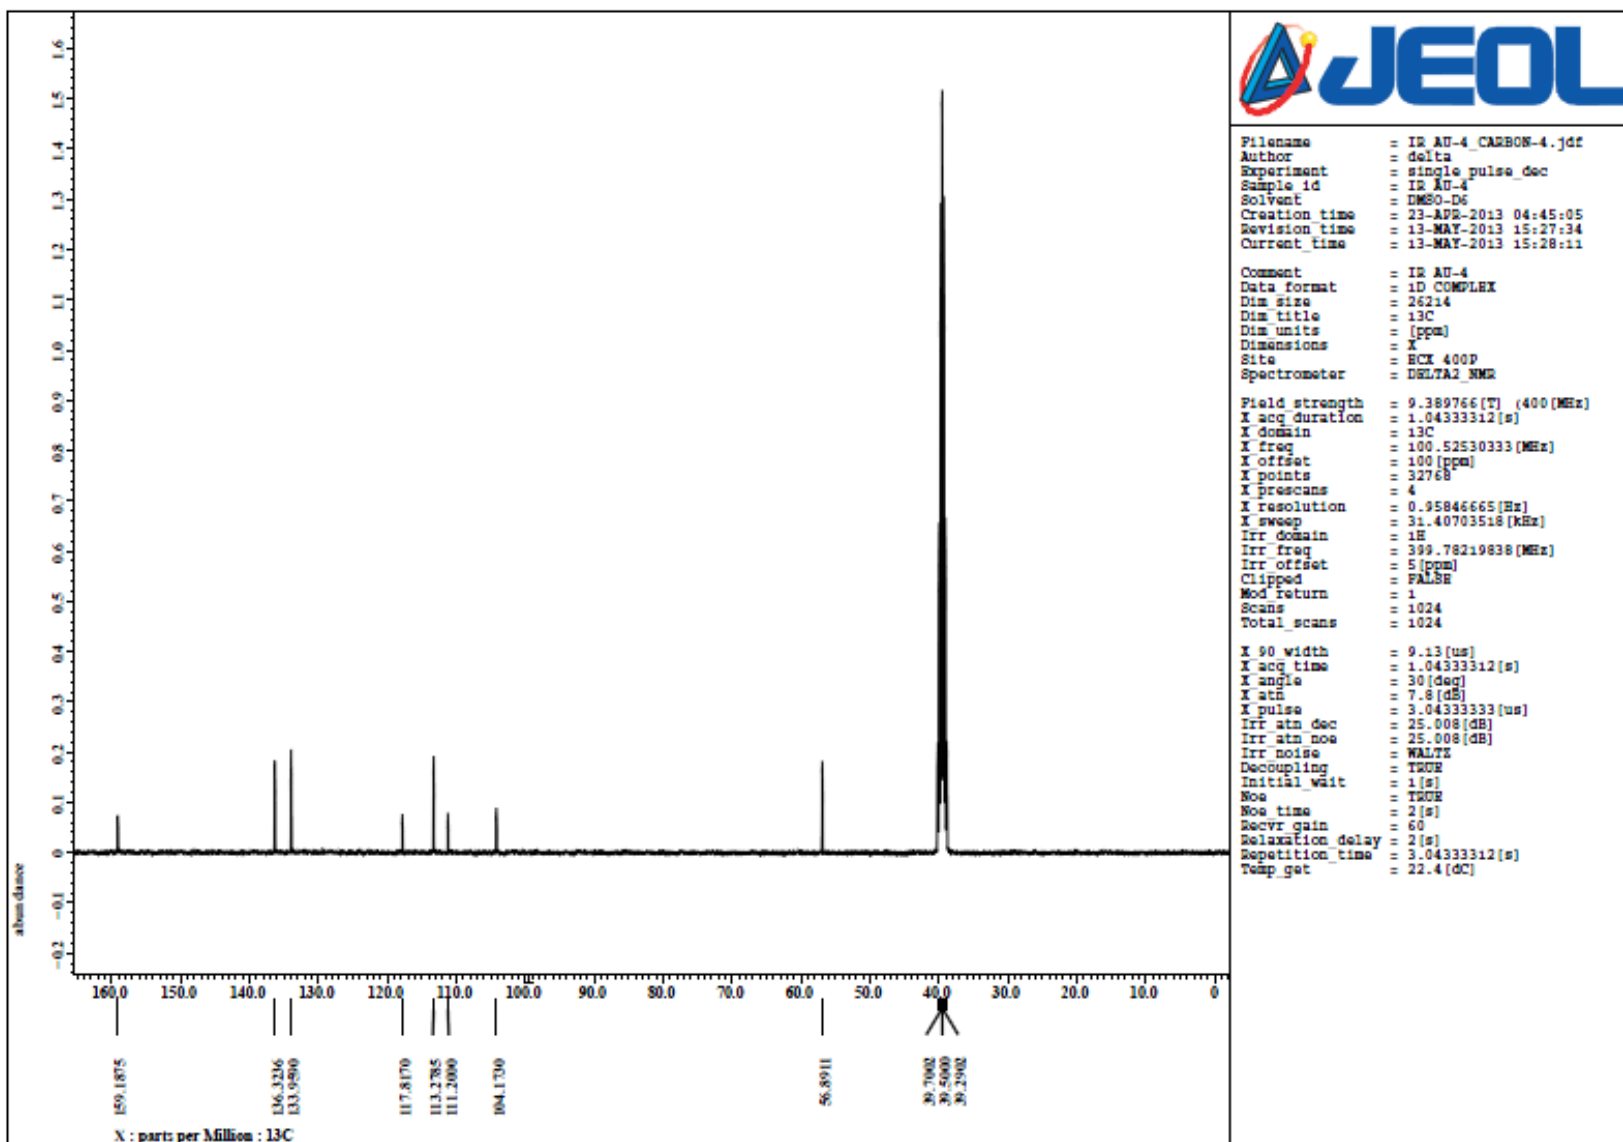

IR spectra of 11b

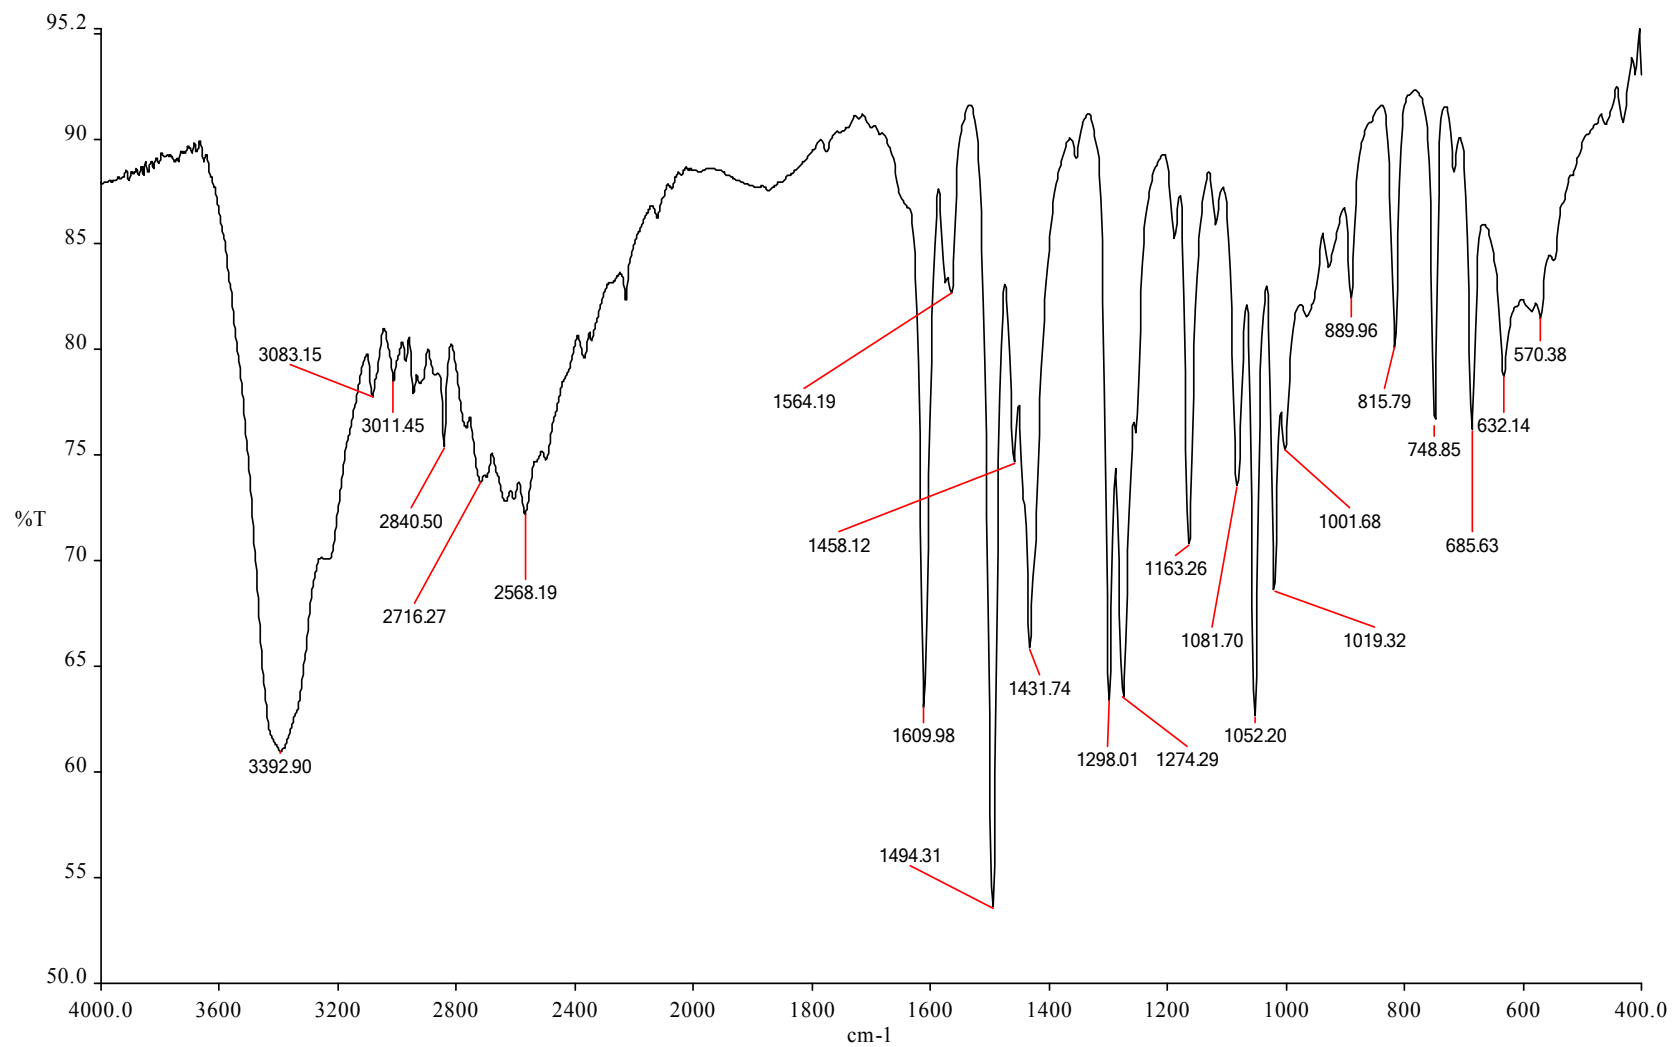

<sup>1</sup>H NMR of 12b

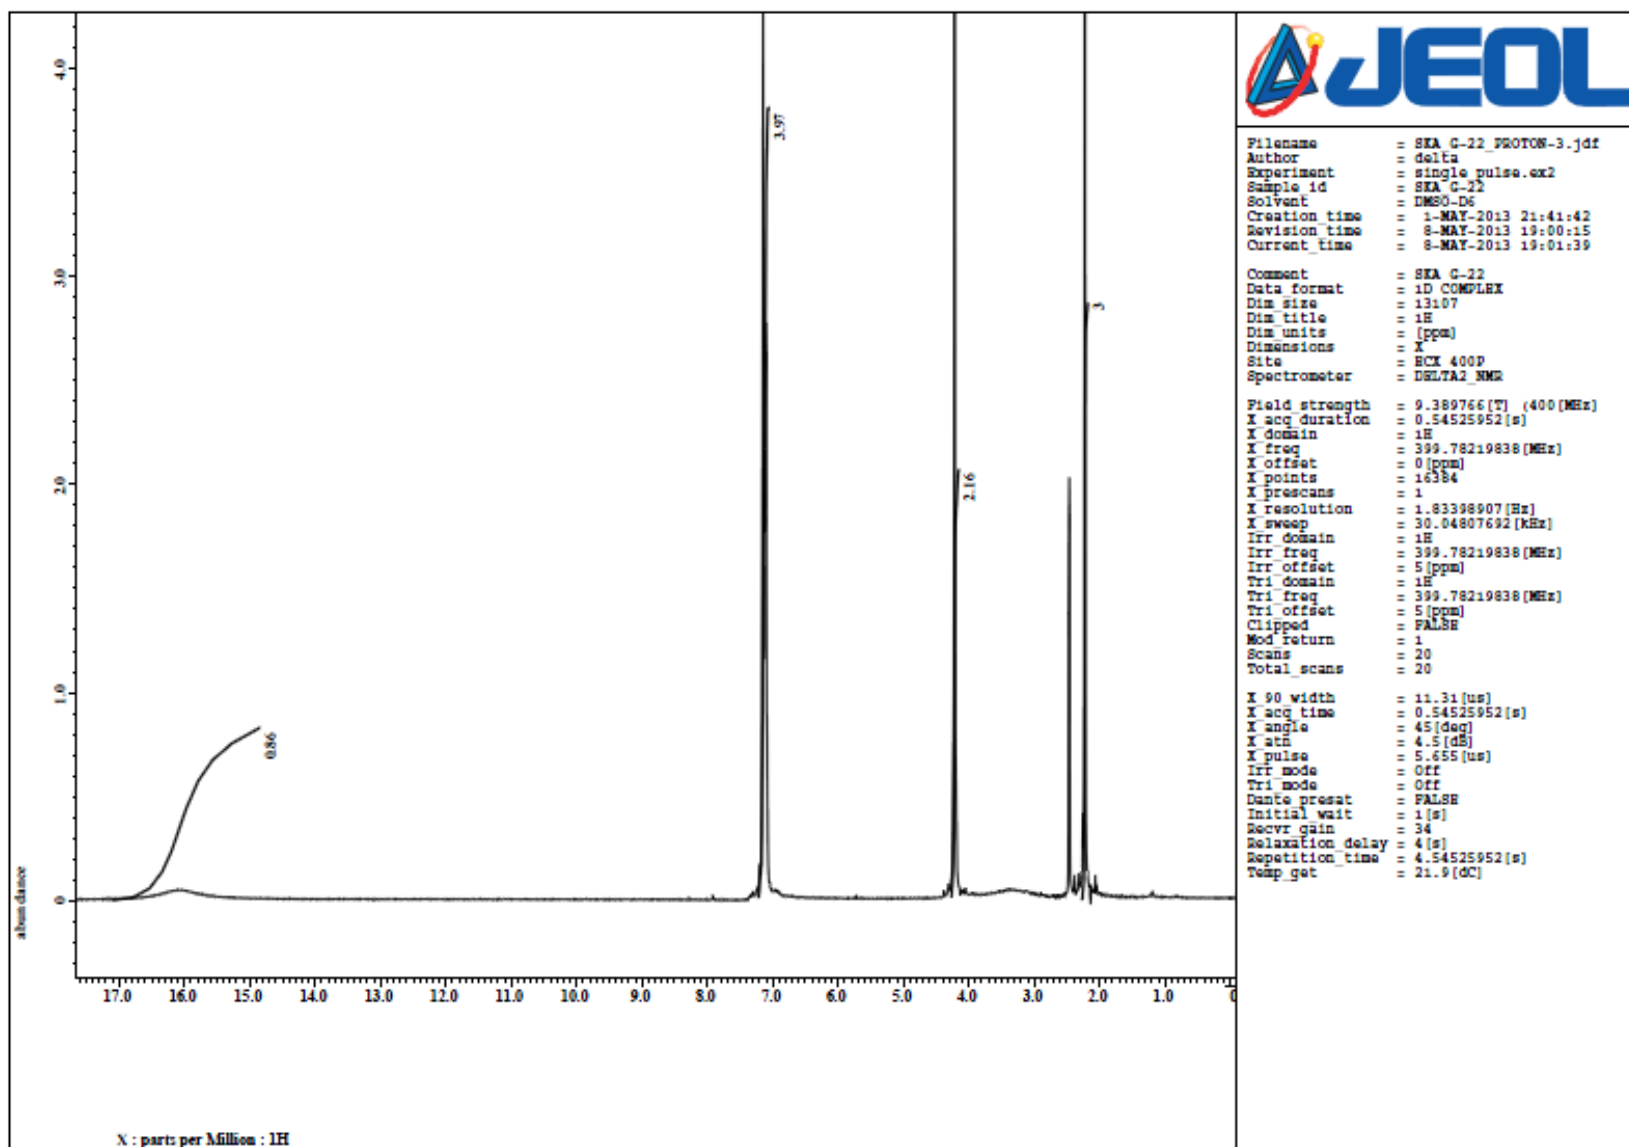

<sup>13</sup>C NMR of 12b

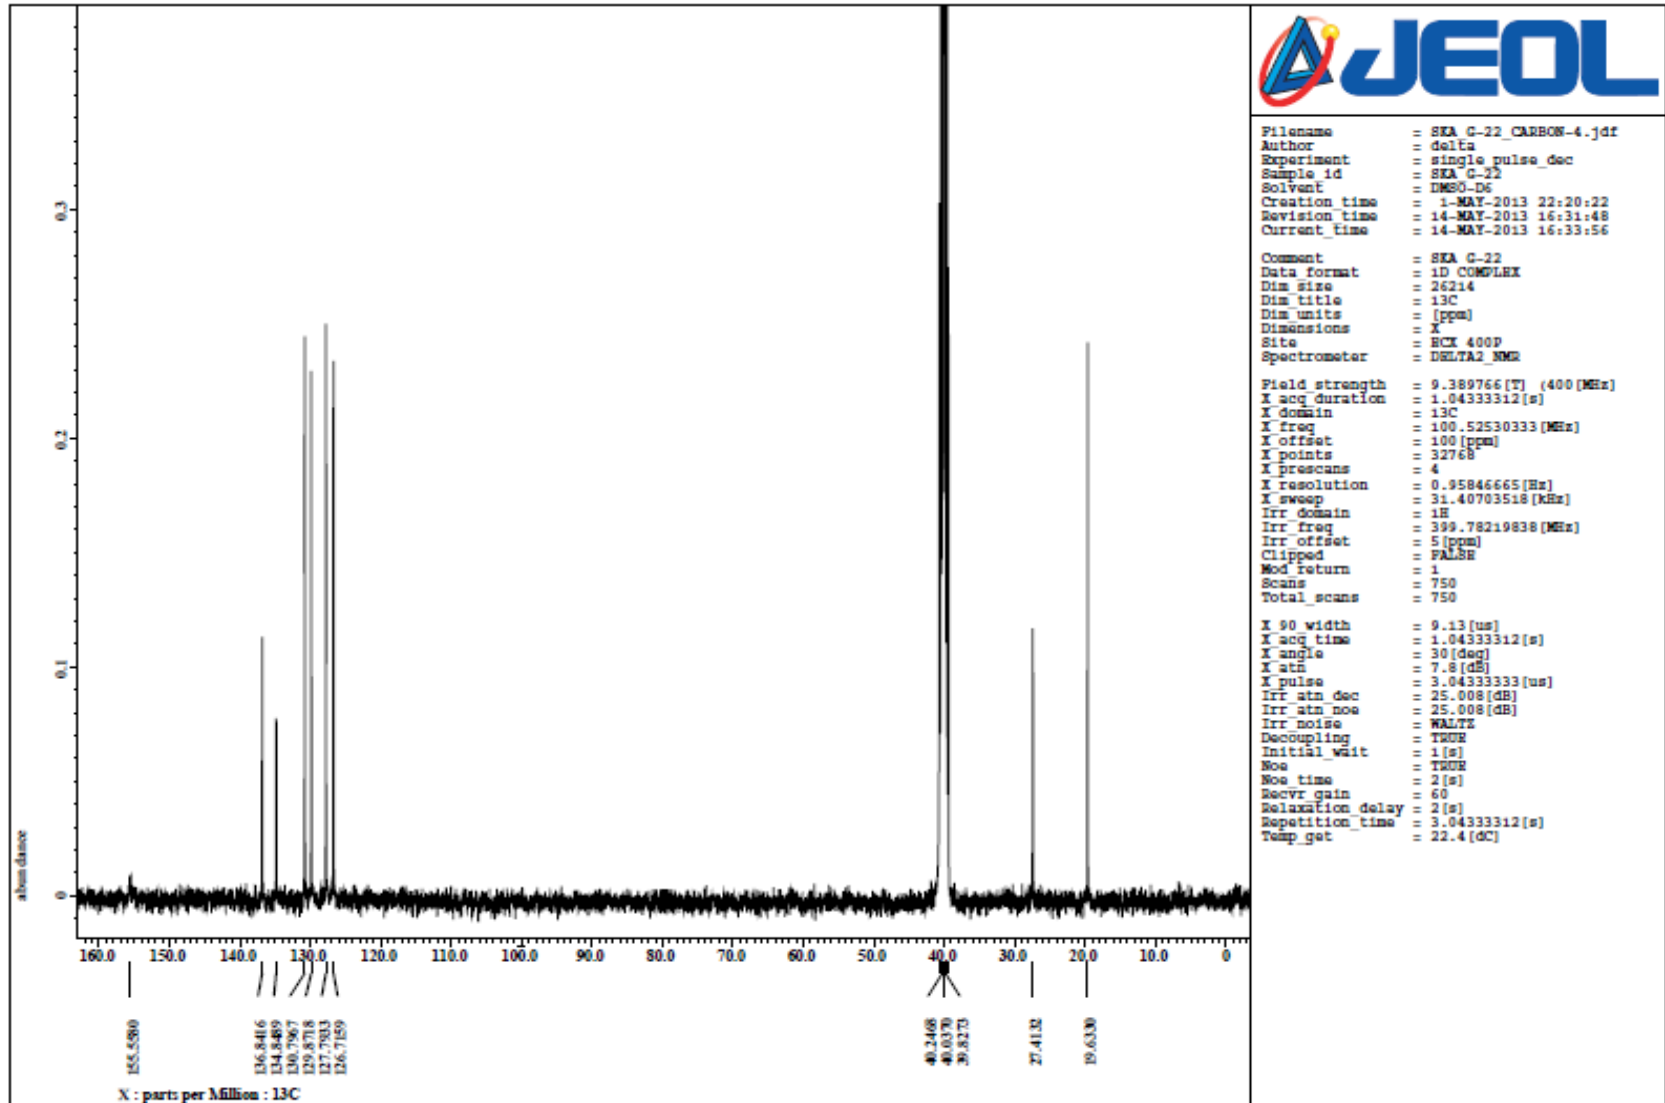

IR spectra of 12b

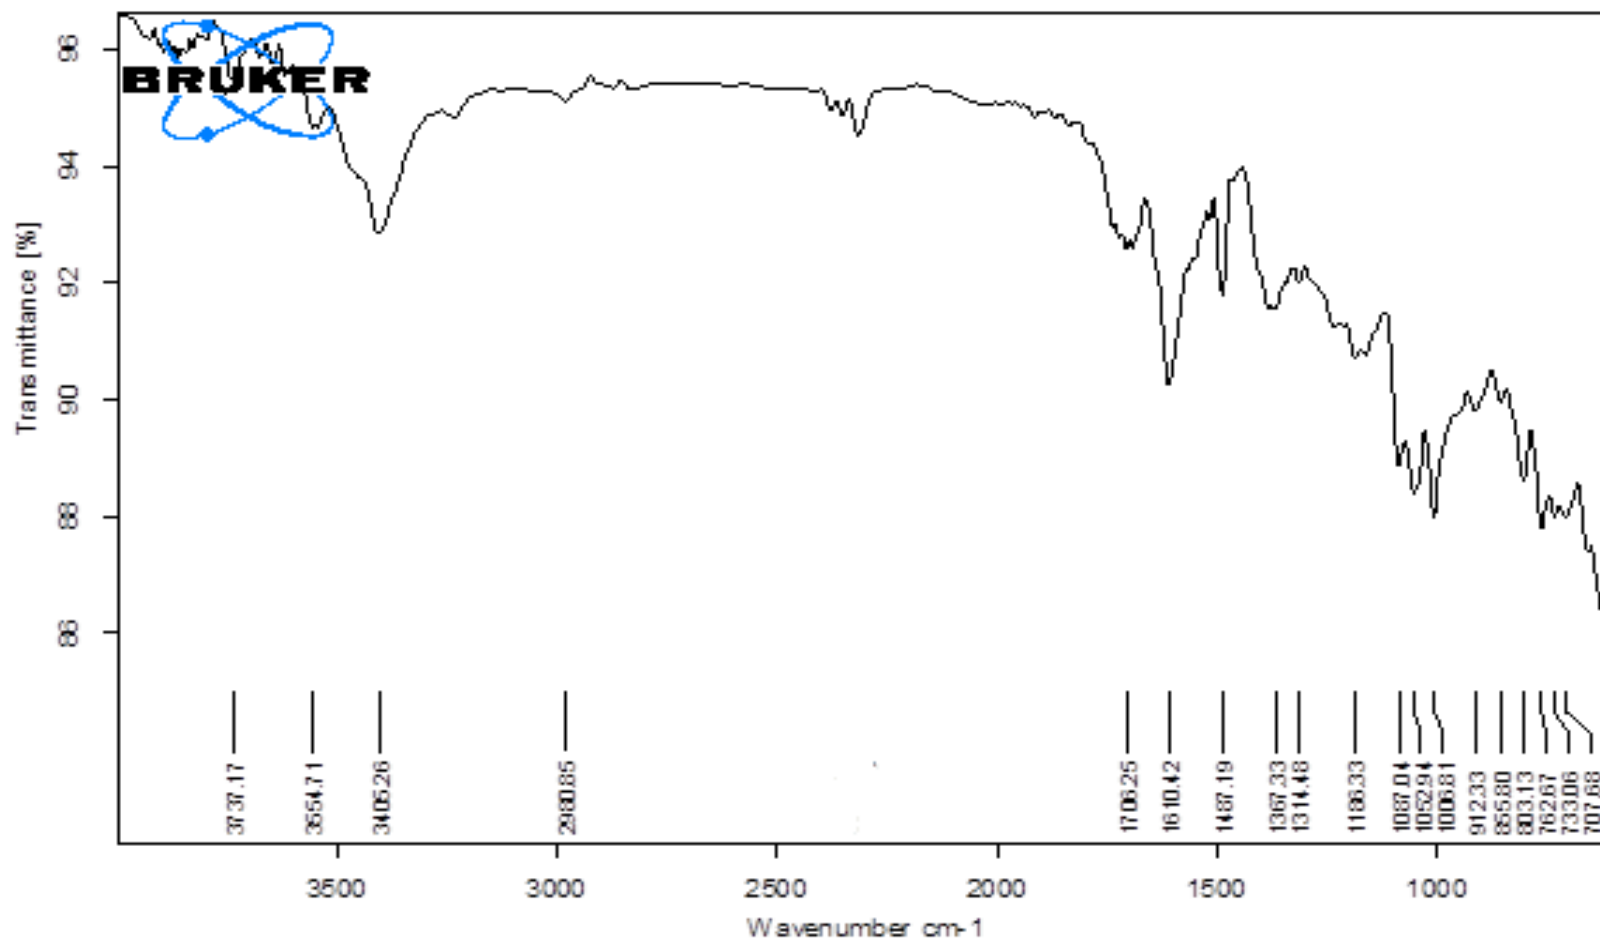

$^1\text{H}$  NMR of 13b

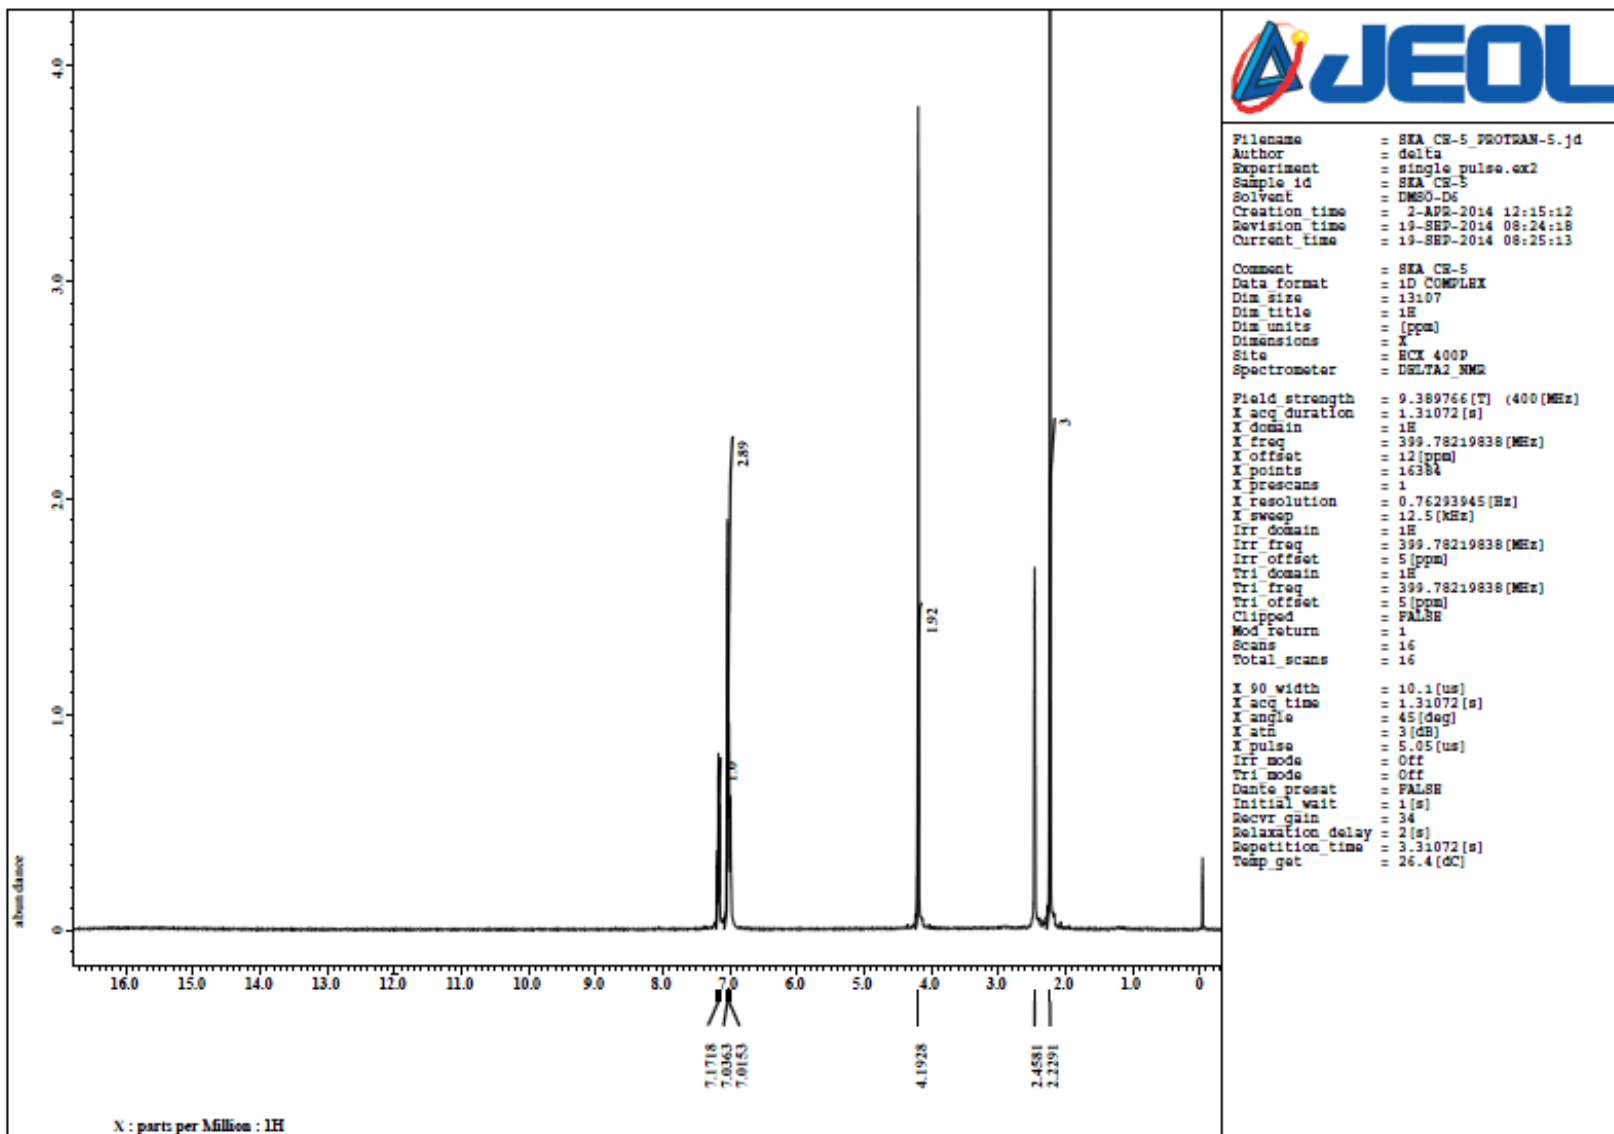

<sup>13</sup>C NMR of 13b

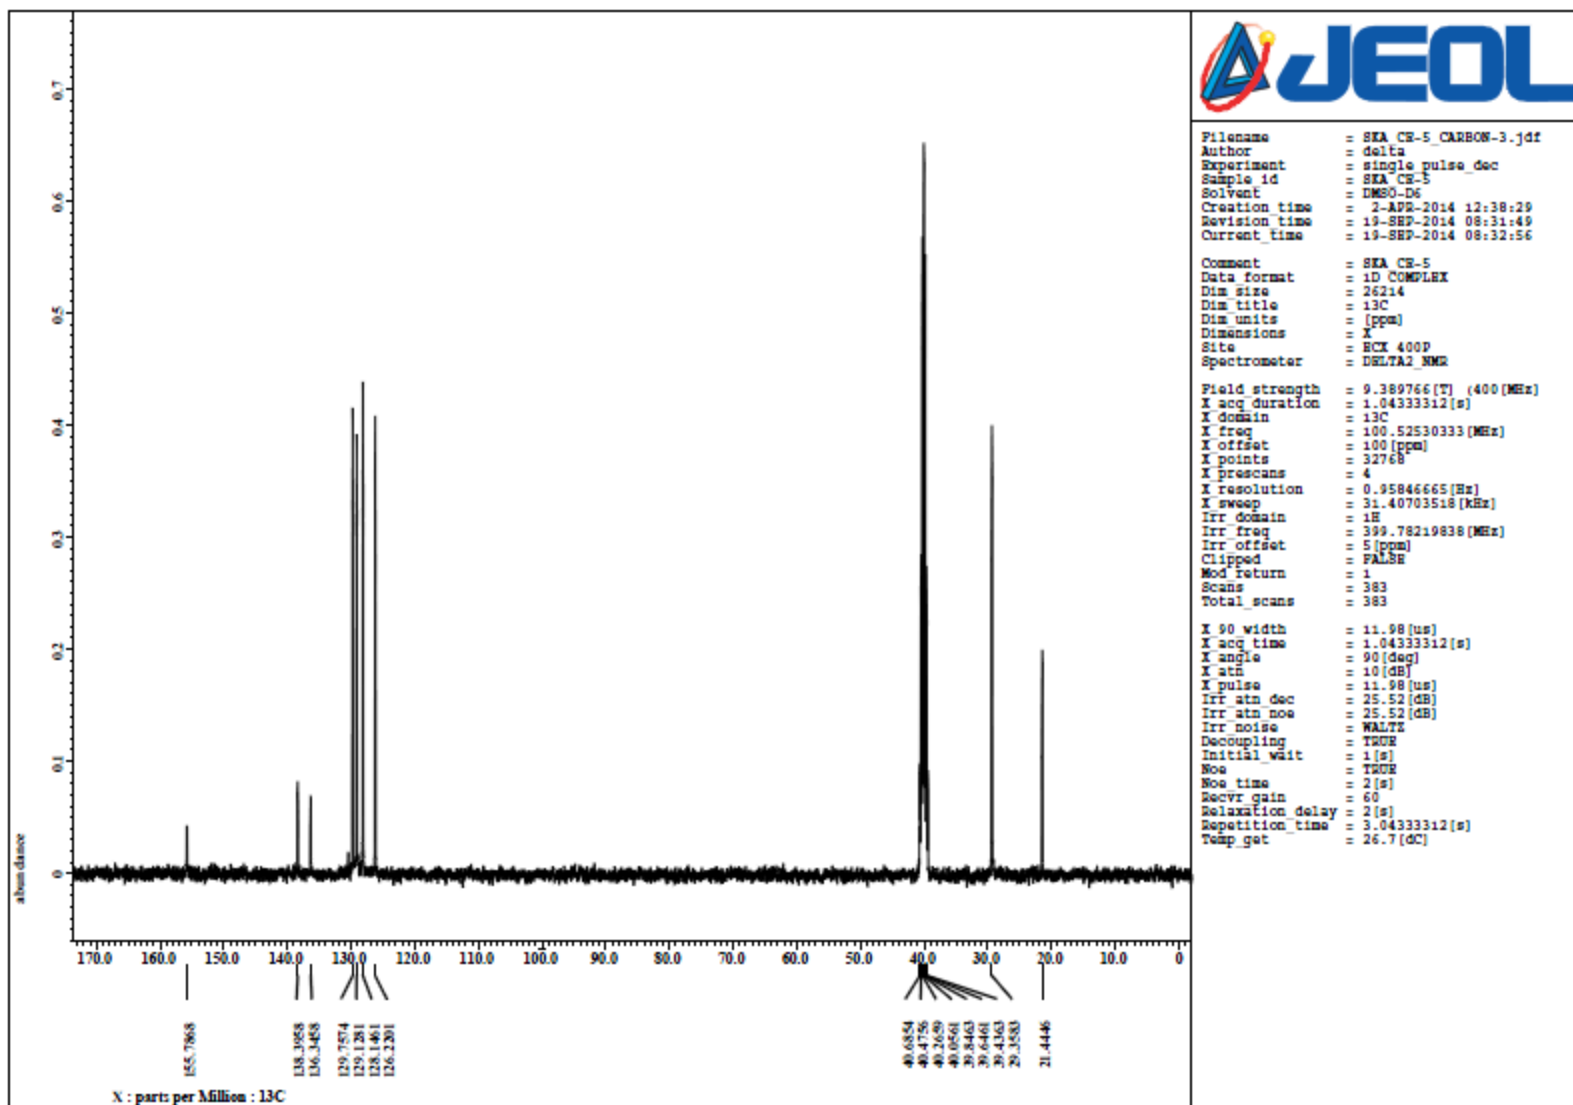

IR spectra of 13b



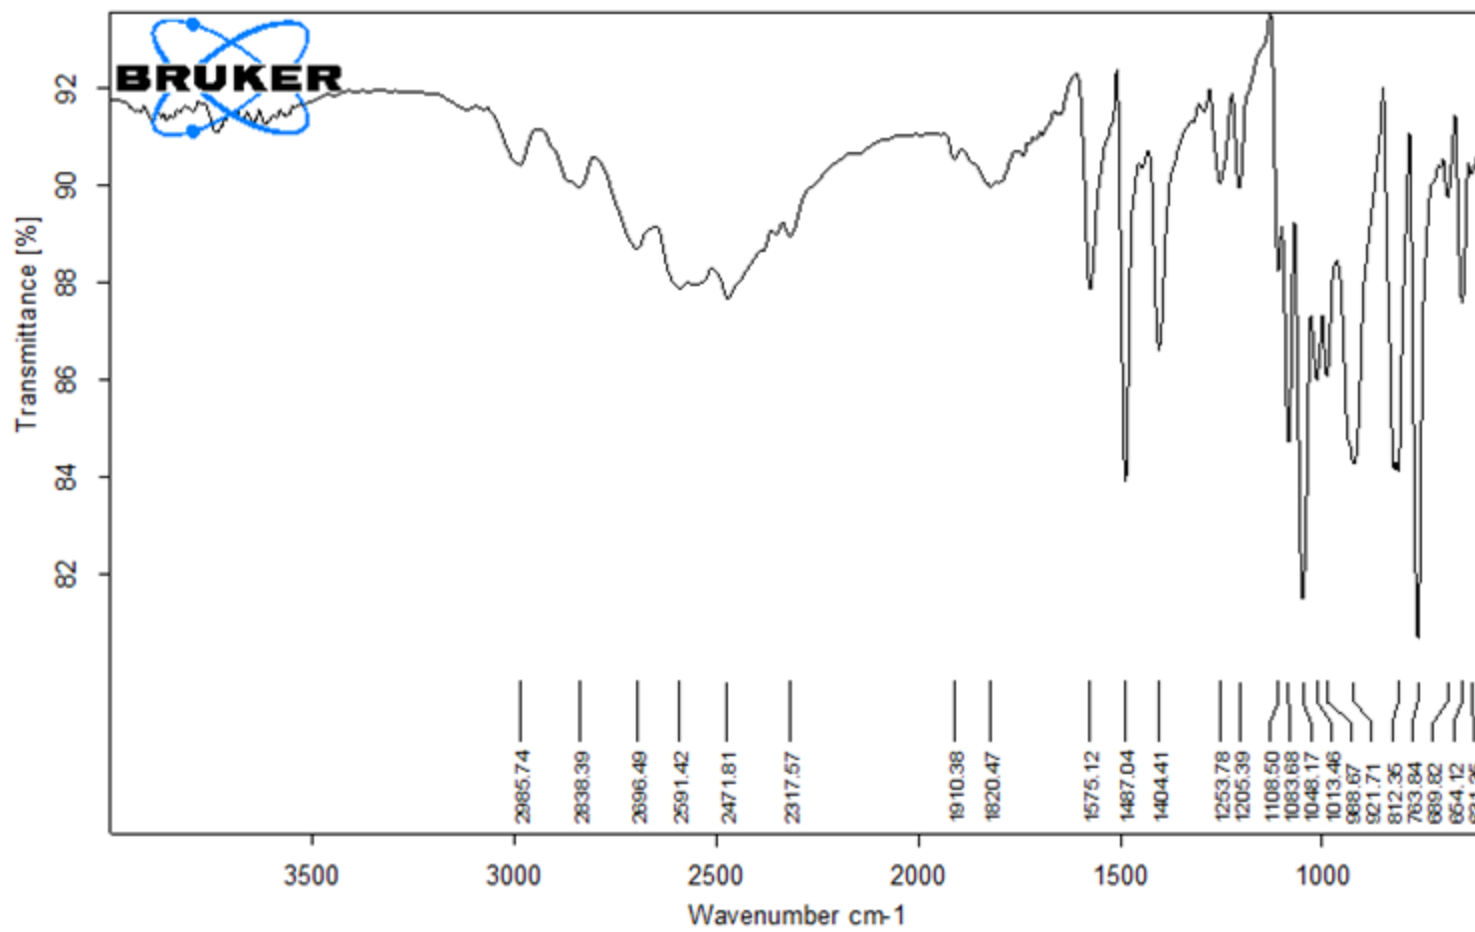

$^1\text{H}$  NMR of 14b

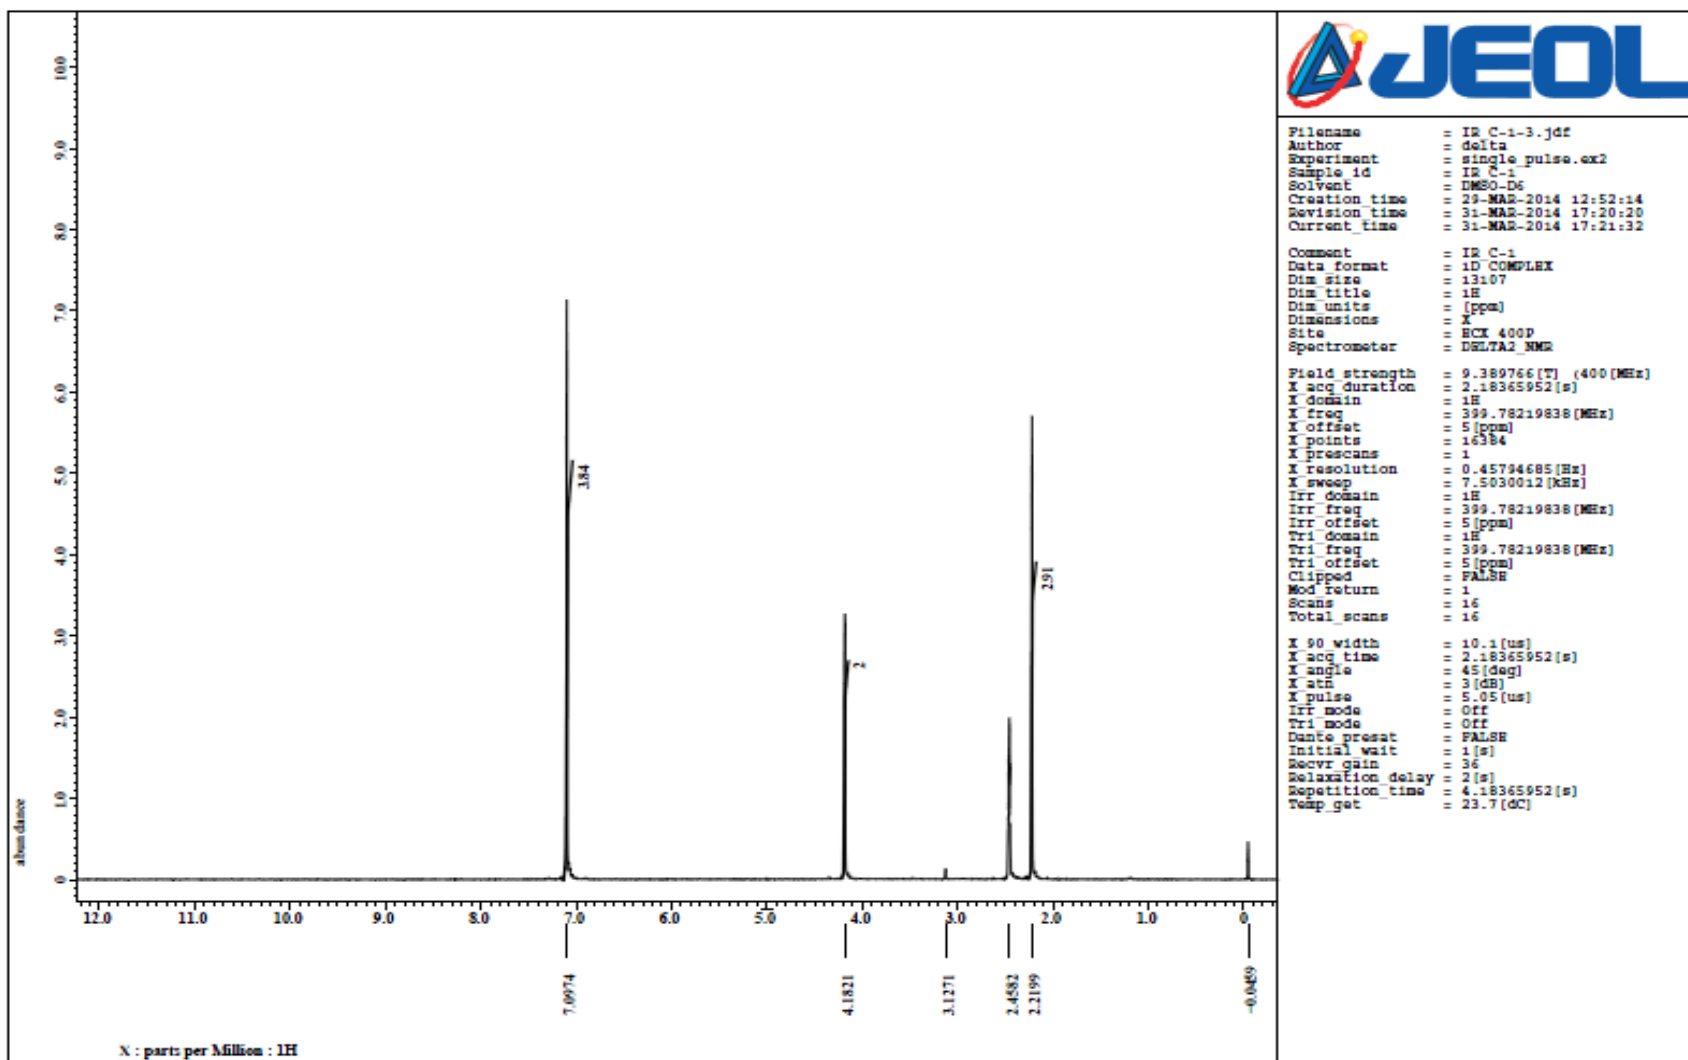

<sup>13</sup>C NMR of 14b

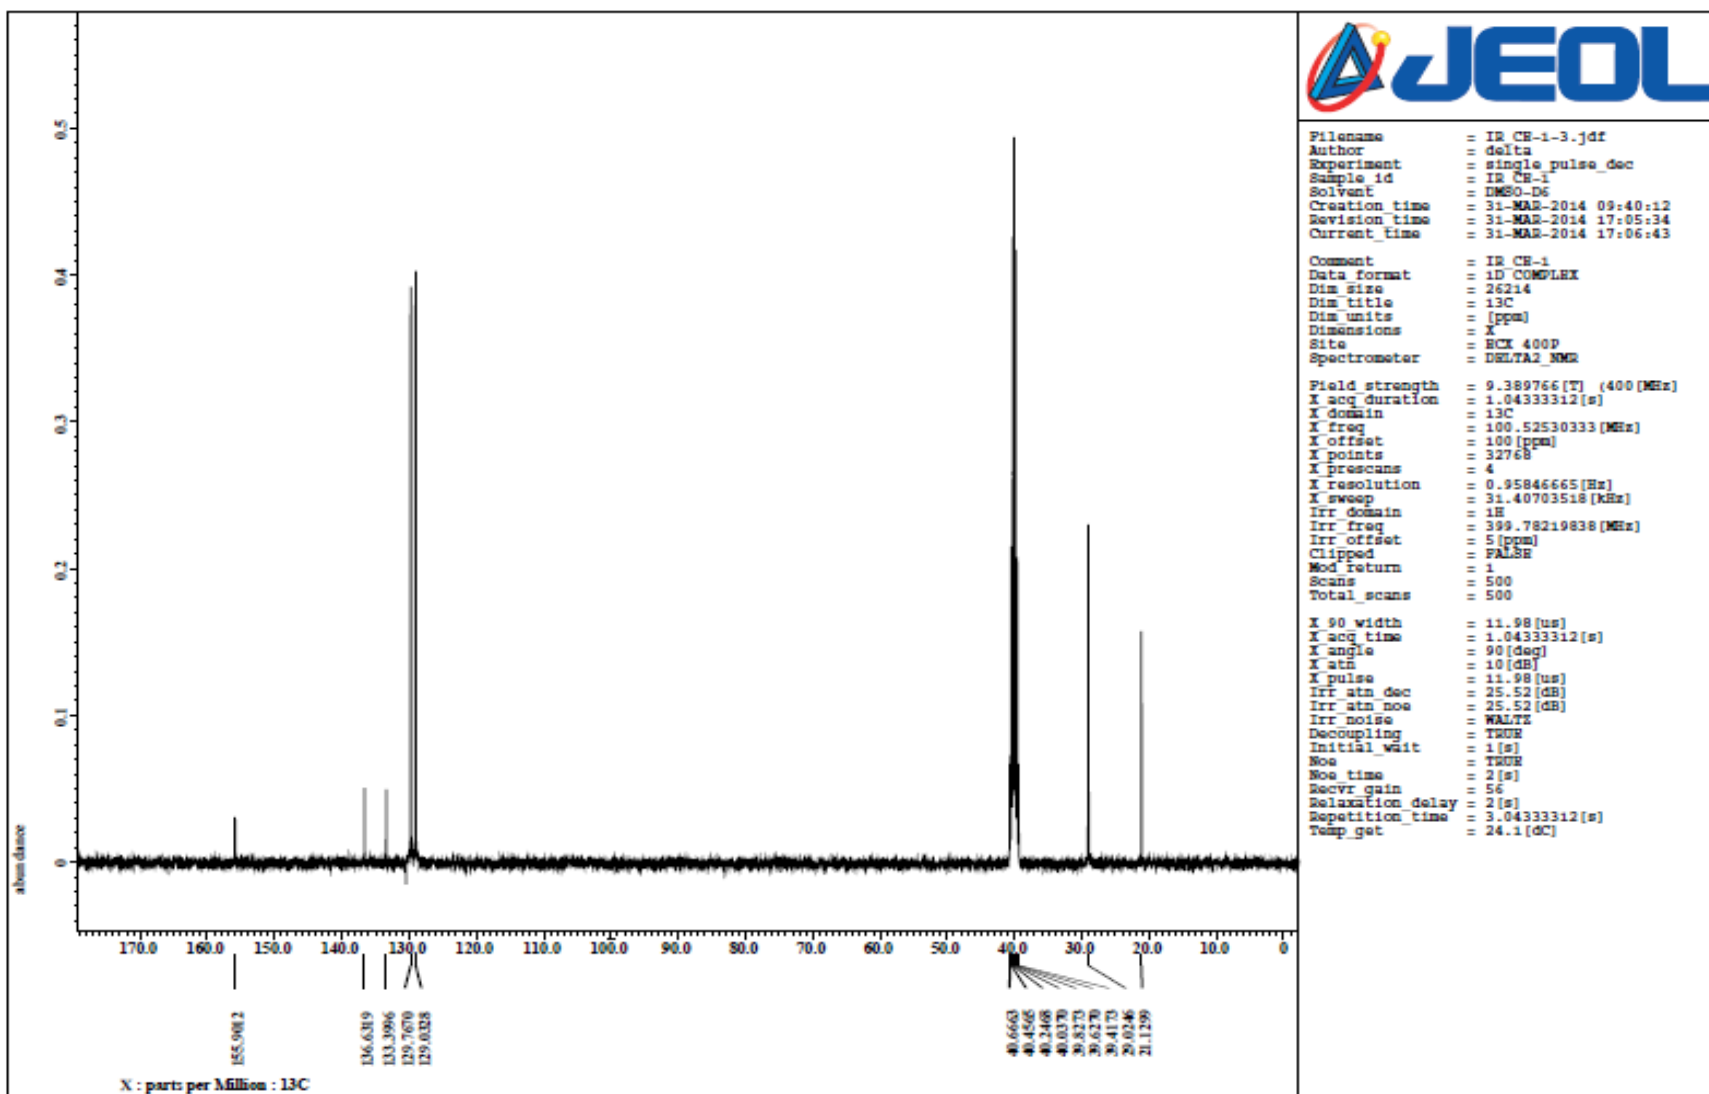

IR spectra of 14b

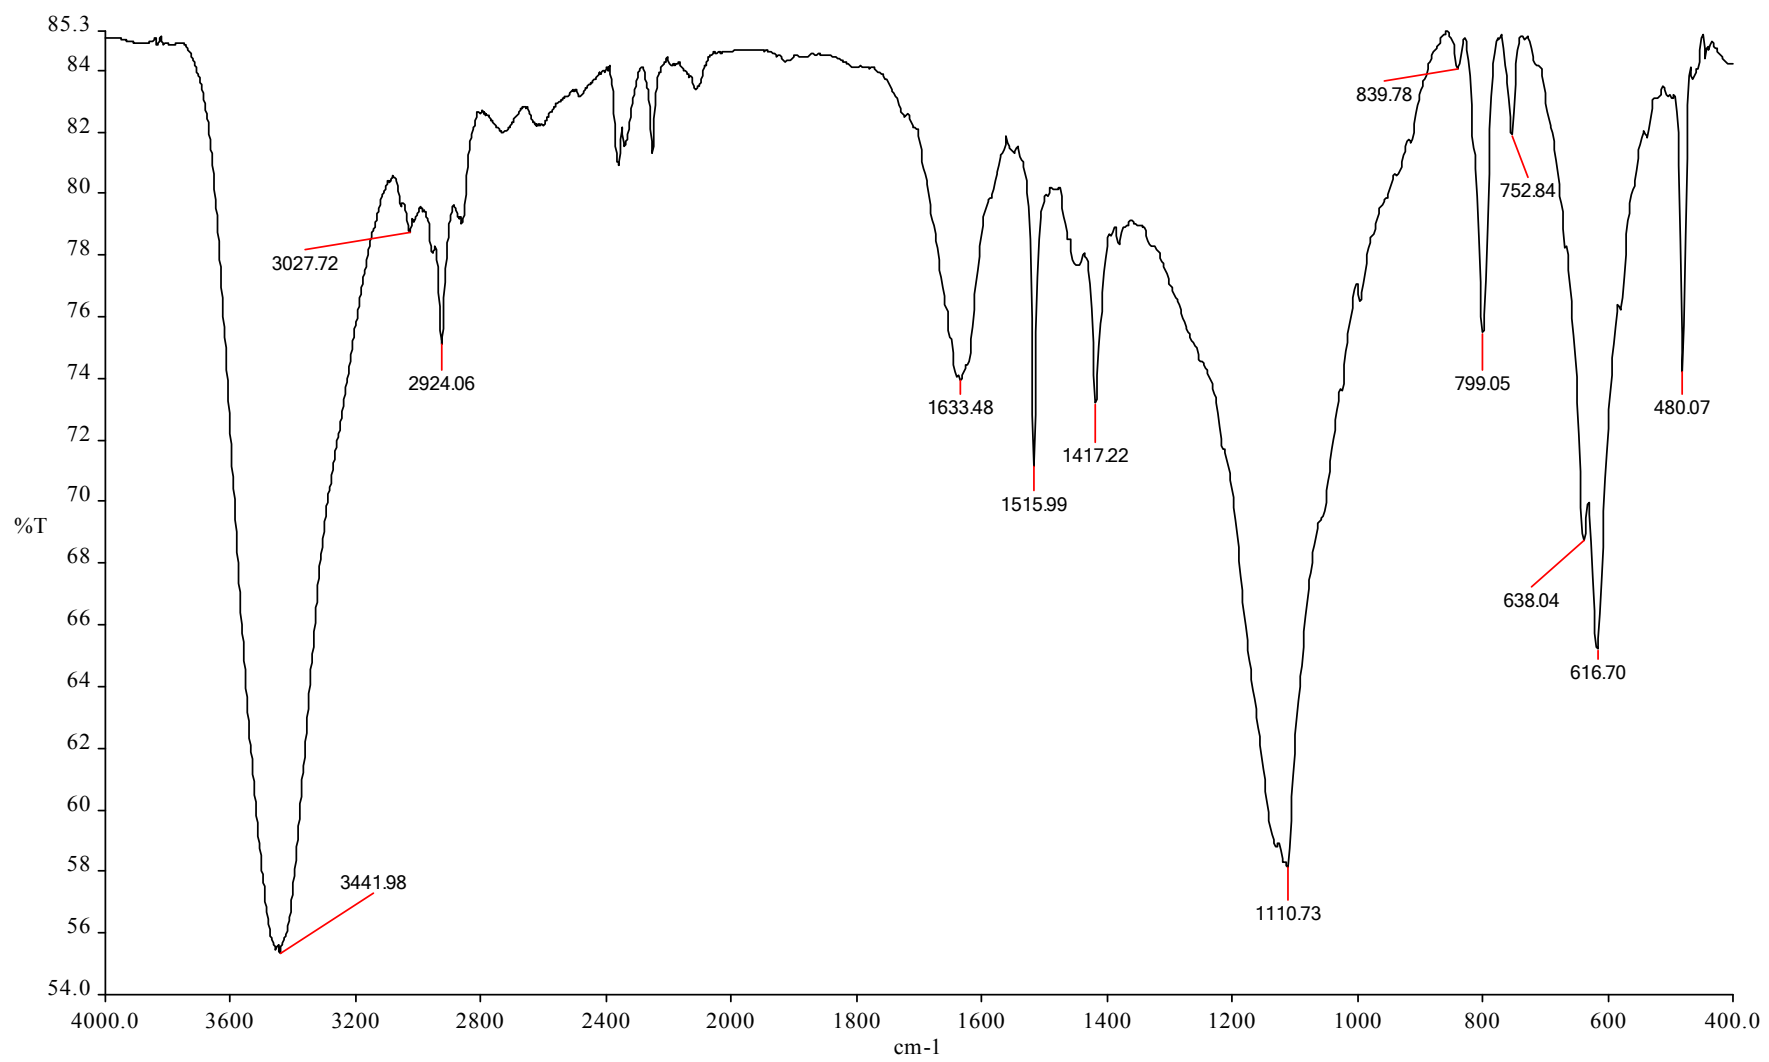

<sup>1</sup>H NMR of 15b

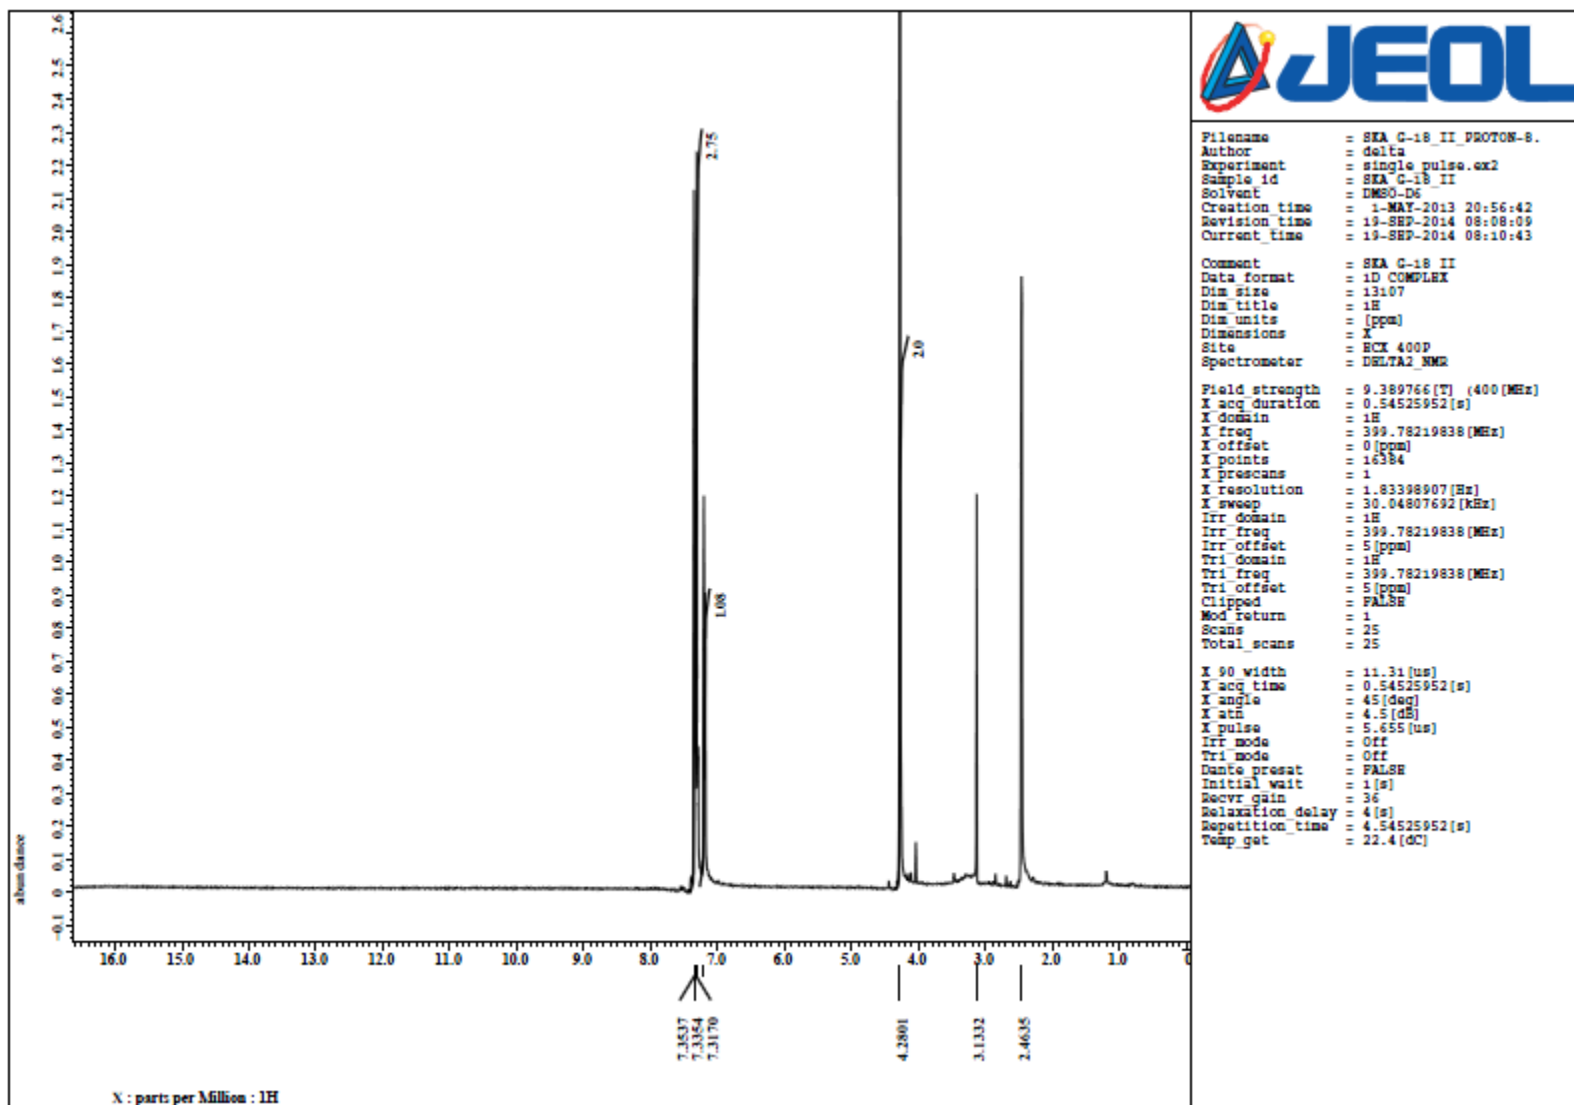

<sup>13</sup>C NMR of 15b

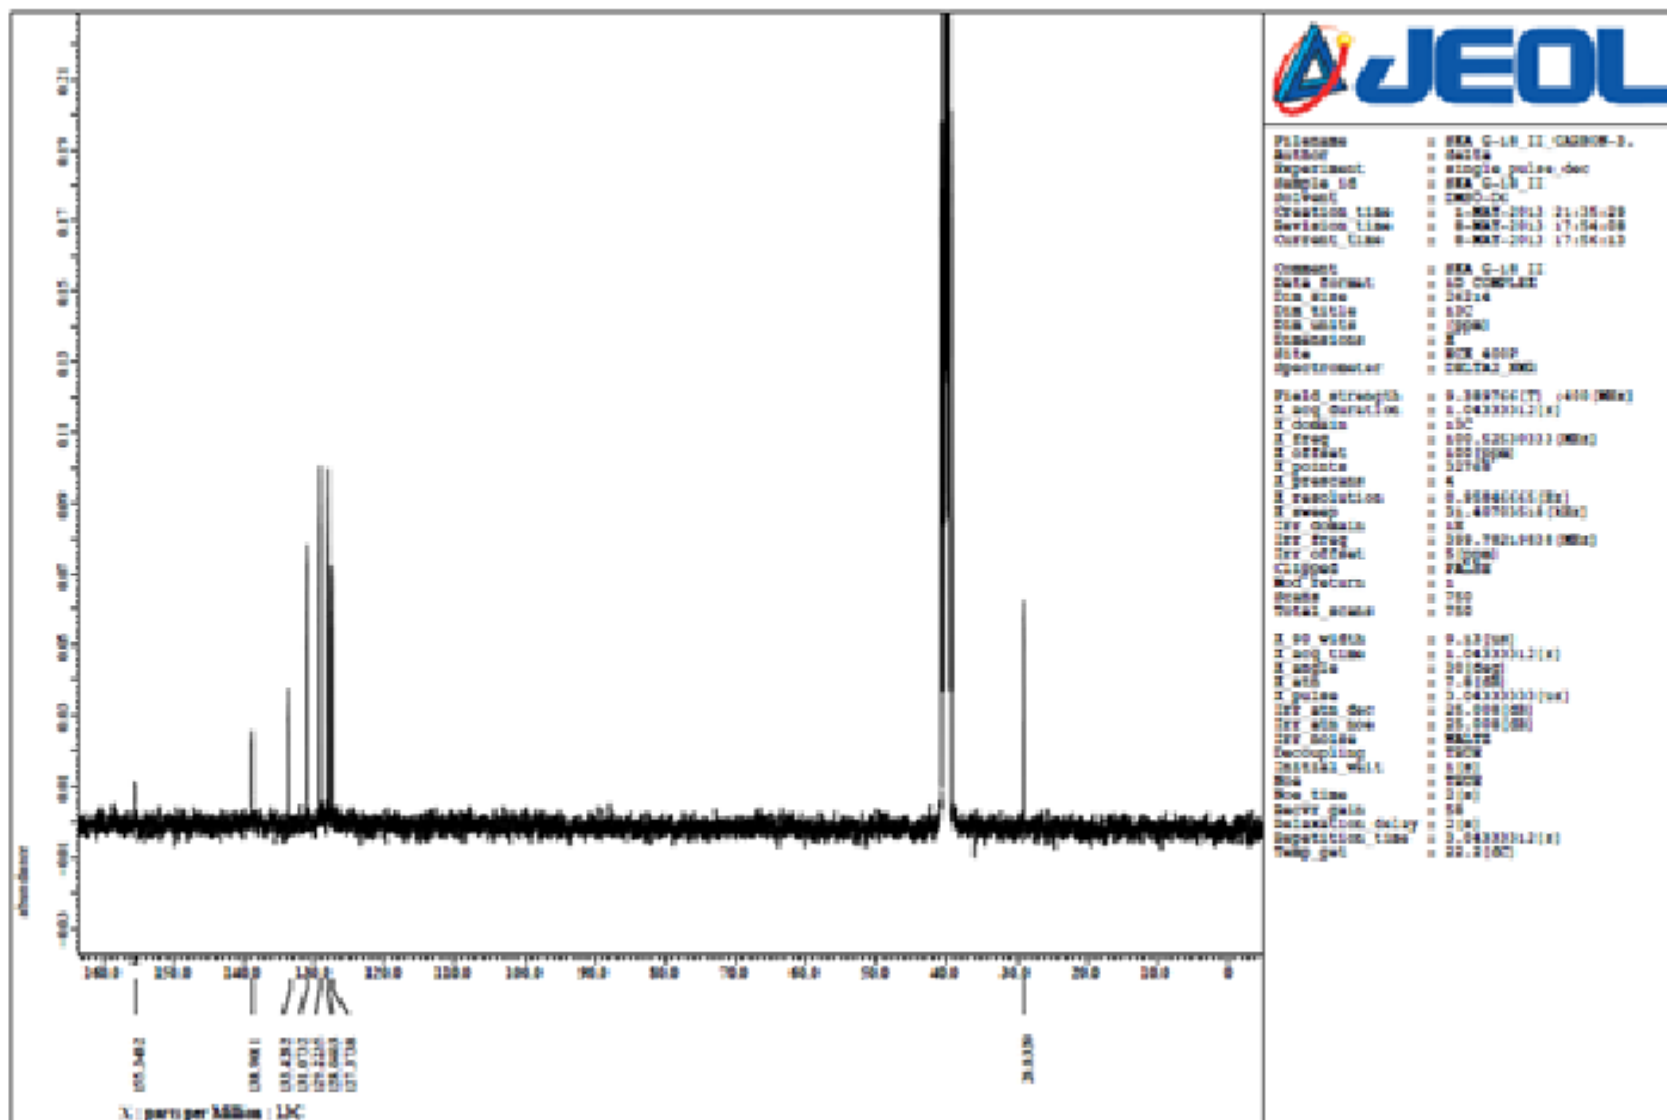

IR spectra of 15b

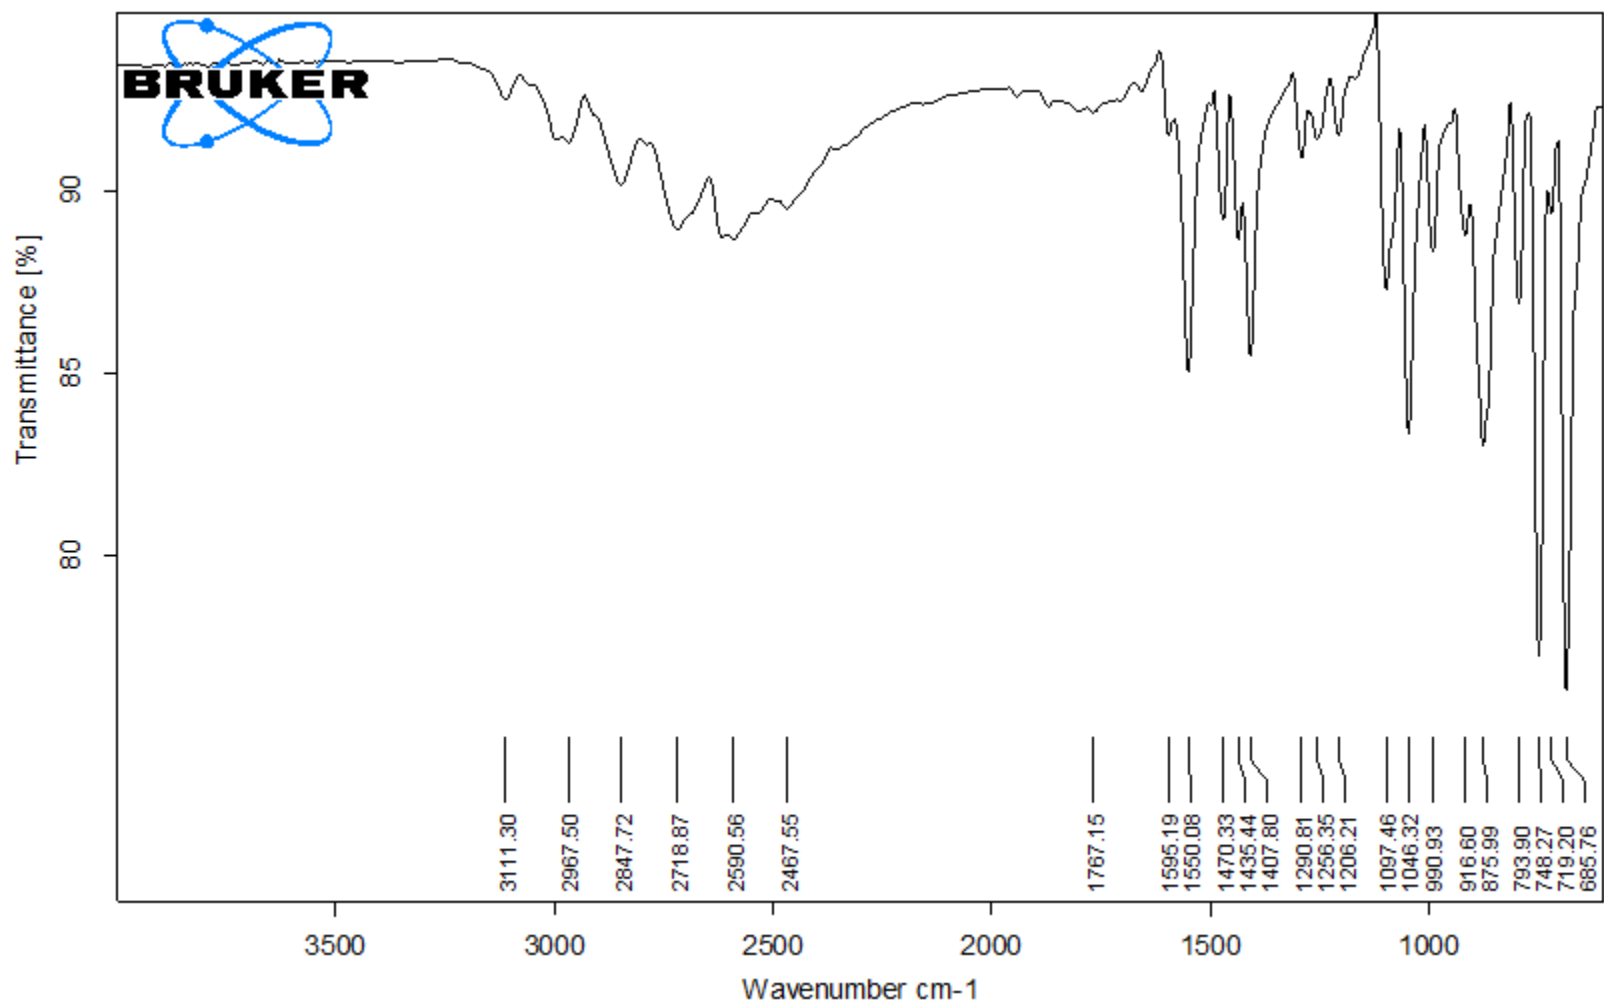

<sup>1</sup>H NMR of 16b

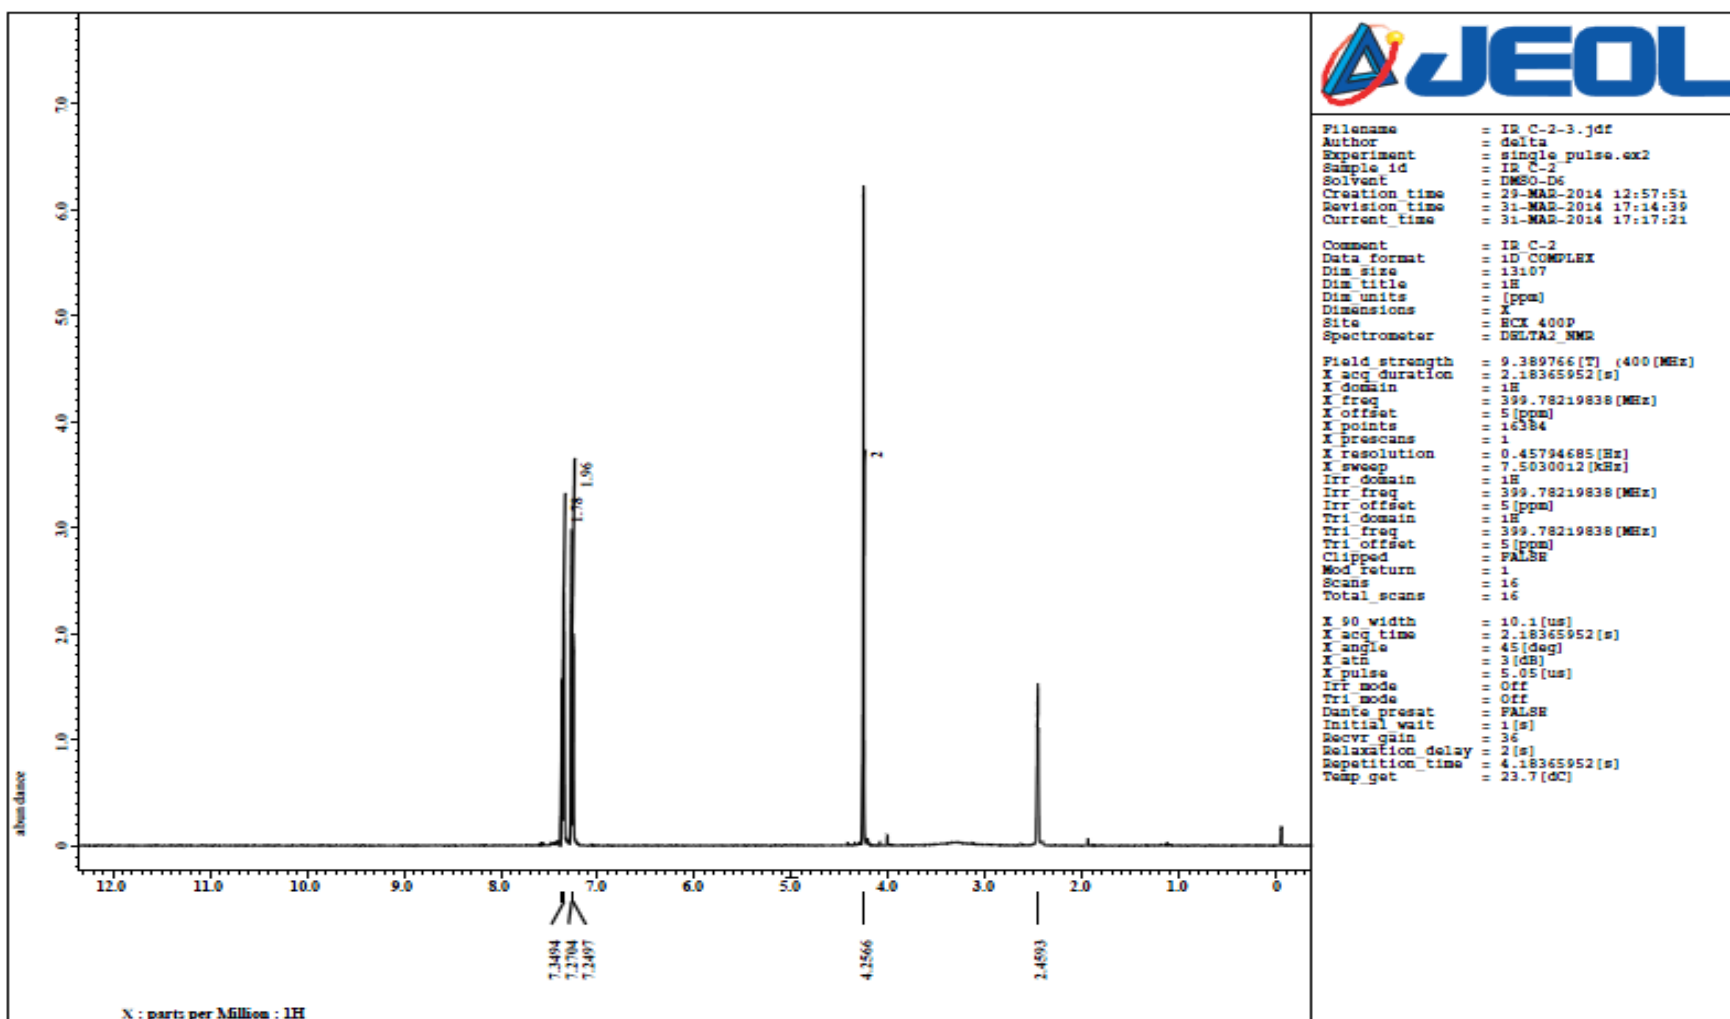



<sup>13</sup>C NMR of 16b

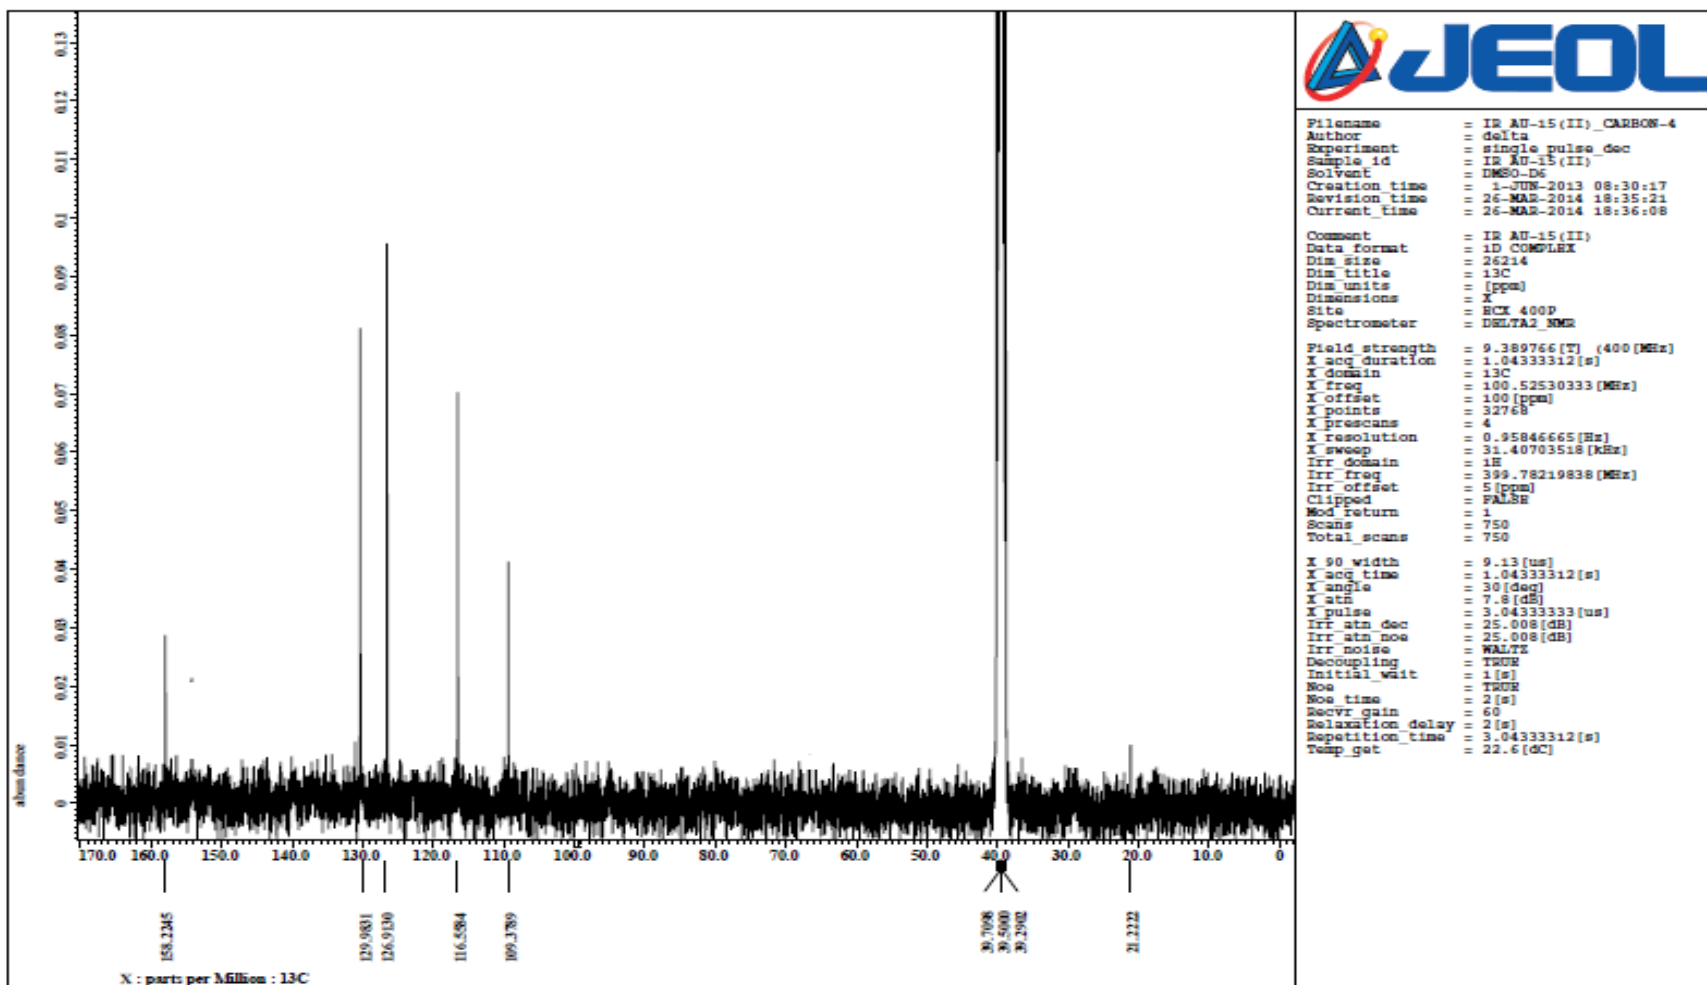

IR spectra of 16b

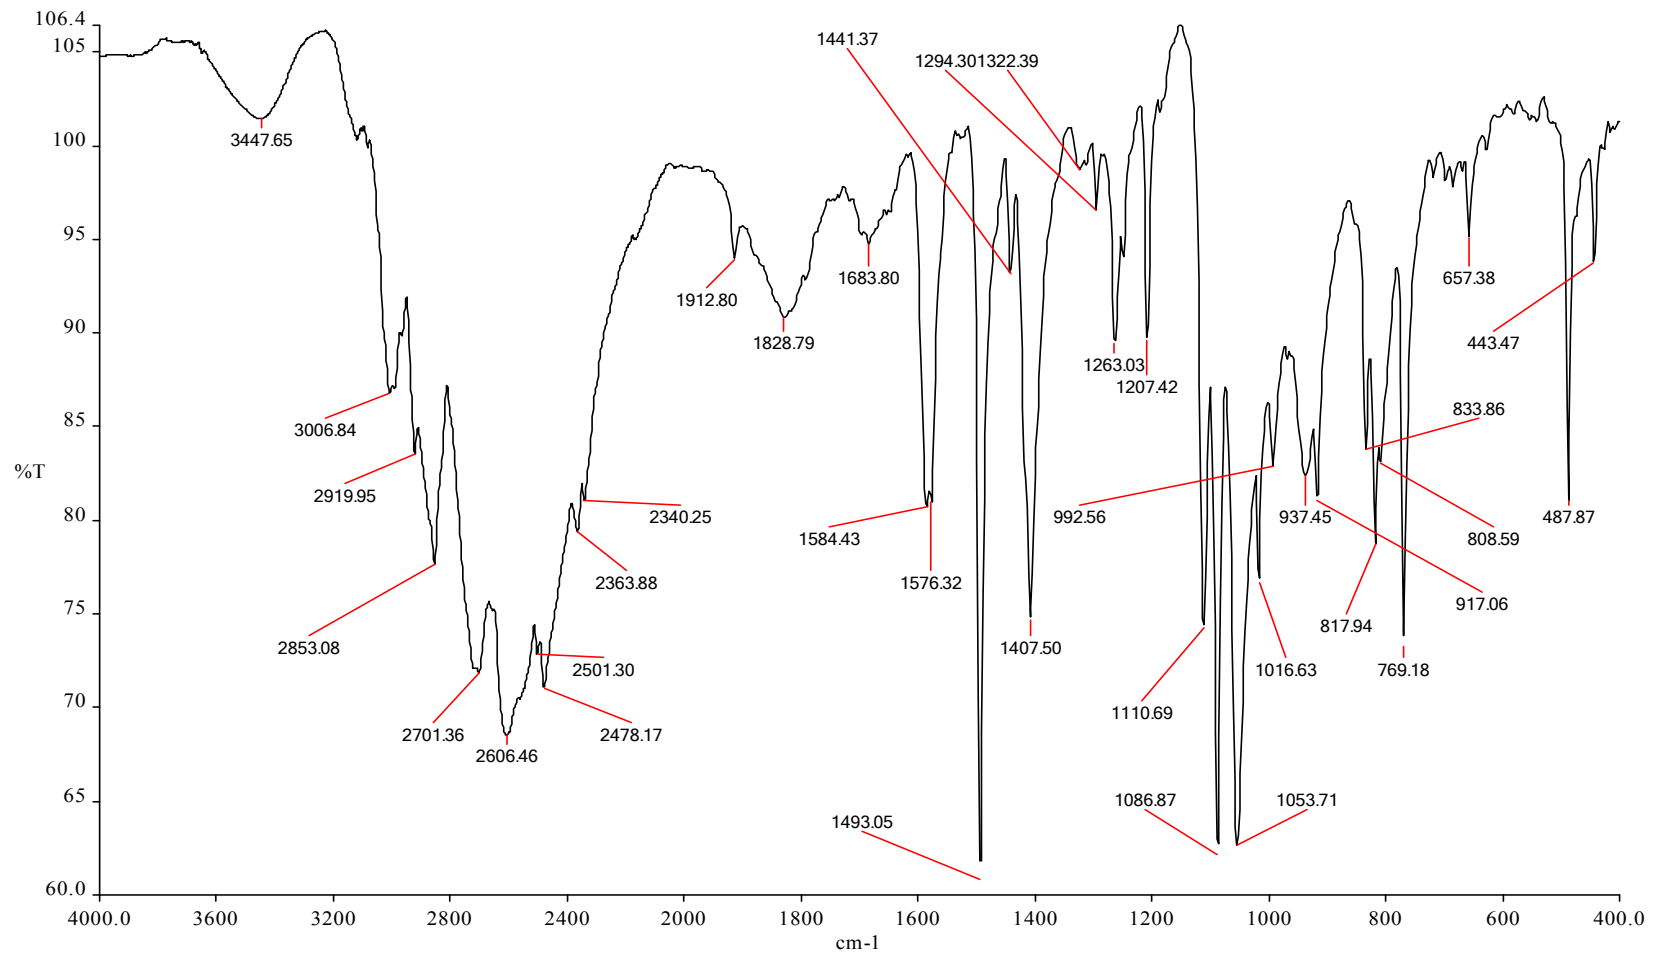

PCP analysis data

| Sample Name: SA-1                 |                   |                   |                   | Sample Type: Unknown Sample |                   |                   |                   |                          |  |
|-----------------------------------|-------------------|-------------------|-------------------|-----------------------------|-------------------|-------------------|-------------------|--------------------------|--|
| Measure Date: 2015-01-19 15:28:06 |                   | Calc. Date:       |                   | State: Measured             |                   | Quality: Drifted  |                   | Total Dilution: 1.000000 |  |
| Sample Identification             |                   |                   |                   |                             |                   |                   |                   |                          |  |
| Sample Name                       |                   |                   |                   |                             |                   |                   |                   |                          |  |
| SA-1                              |                   |                   |                   |                             |                   |                   |                   |                          |  |
|                                   | <b>Ar 430.010</b> | <b>Ar 404.442</b> | <b>Au</b>         | <b>Pd</b>                   | <b>Rh</b>         |                   |                   |                          |  |
| Conc 1                            | 381381            | 214509            | <-0.173[mg/l]     | <-0.071[mg/l]               | <-0.089[mg/l]     |                   |                   |                          |  |
| Conc MinRange                     | ---               | ---               | 0.001[mg/l]       | 0.001[mg/l]                 | 0.005[mg/l]       |                   |                   |                          |  |
| Conc Mean                         | 381381            | 214509            | <-0.173[mg/l]     | <-0.071[mg/l]               | <-0.089[mg/l]     |                   |                   |                          |  |
| Conc MaxRange                     | ---               | ---               | 12.000[mg/l]      | 12.000[mg/l]                | 12.000[mg/l]      |                   |                   |                          |  |
| Conc RSD                          | ---               | ---               | 0.000             | 0.000                       | 0.000             |                   |                   |                          |  |
| Conc SD                           | 0.000             | 0.000             | <0.000[mg/l]      | <0.000[mg/l]                | <0.000[mg/l]      |                   |                   |                          |  |
| Reported                          | ---               | ---               | <-0.173[mg/l]     | <-0.071[mg/l]               | <-0.089[mg/l]     |                   |                   |                          |  |
|                                   | <b>Ar 430.010</b> | <b>Ar 404.442</b> | <b>Au 242.795</b> | <b>Au 267.595</b>           | <b>Pd 340.458</b> | <b>Pd 229.651</b> | <b>Rh 343.489</b> |                          |  |
| Conc 1                            | 381381            | 214509            | <-0.173[mg/l]     | <-0.217[mg/l]               | <-0.071[mg/l]     | <-0.095[mg/l]     | <-0.089[mg/l]     |                          |  |
| Conc MinRange                     | ---               | ---               | 0.001[mg/l]       | 0.003[mg/l]                 | 0.001[mg/l]       | 0.007[mg/l]       | 0.010[mg/l]       |                          |  |
| Conc Mean                         | 381381            | 214509            | <-0.173[mg/l]     | <-0.217[mg/l]               | <-0.071[mg/l]     | <-0.095[mg/l]     | <-0.089[mg/l]     |                          |  |
| Conc MaxRange                     | ---               | ---               | 12.000[mg/l]      | 12.000[mg/l]                | 12.000[mg/l]      | 12.000[mg/l]      | 12.000[mg/l]      |                          |  |
| Conc RSD                          | ---               | ---               | 0.000             | 0.000                       | 0.000             | 0.000             | 0.000             |                          |  |
| Conc SD                           | 0.000             | 0.000             | <0.000[mg/l]      | <0.000[mg/l]                | <0.000[mg/l]      | <0.000[mg/l]      | <0.000[mg/l]      |                          |  |
| Reported                          | ---               | ---               | ---               | ---                         | ---               | ---               | ---               |                          |  |
|                                   | <b>Rh 233.477</b> |                   |                   |                             |                   |                   |                   |                          |  |
| Conc 1                            | <-0.123[mg/l]     |                   |                   |                             |                   |                   |                   |                          |  |
| Conc MinRange                     | 0.005[mg/l]       |                   |                   |                             |                   |                   |                   |                          |  |
| Conc Mean                         | <-0.123[mg/l]     |                   |                   |                             |                   |                   |                   |                          |  |
| Conc MaxRange                     | 12.000[mg/l]      |                   |                   |                             |                   |                   |                   |                          |  |
| Conc RSD                          | 0.000             |                   |                   |                             |                   |                   |                   |                          |  |
| Conc SD                           | <0.000[mg/l]      |                   |                   |                             |                   |                   |                   |                          |  |
| Reported                          | ---               |                   |                   |                             |                   |                   |                   |                          |  |

Table 5. ICP analysis data
